# Supplementary material for: Silver(i)-catalyzed novel ipso-cycloaddition and retro-Friedel–Crafts reaction of ortho-hydroxyphenyl-substituted para-quinone methides
Source: Royal Society of Chemistry journal article supplement (doi:10.1039/d1qo01056e), 2021-01-01
Supplement: d1qo01056e1.pdf [file d1qo01056e1.pdf]

# Supporting Information

## Silver(I)-Catalyzed Novel *ipso*-Cycloaddition and retro-Friedel-Crafts Reaction of *ortho*-Hydroxyphenyl-Substituted *para*-Quinone Methides

Caiqi Zhuo,<sup>†</sup> Ran Song,<sup>†</sup> Zhanxu Liu, Qirui Xiang, Daoshan Yang, Wen Si,<sup>\*</sup> and Jian Lv<sup>\*</sup>

*Key Laboratory of Optic-electric Sensing and Analytic Chemistry for Life Science, MOE, College of Chemistry and Molecular Engineering, Qingdao University of Science & Technology, Qingdao 266042, China*

*\*Email: lvjian@iccas.ac.cn (for J. Lv); siwen@qust.edu.cn (for W. Si)*

### Table of Contents

|                                                      |     |
|------------------------------------------------------|-----|
| 1. General Experiment Information and Materials      | S1  |
| 2. Investigation of Water effect                     | S2  |
| 3. Experimental Procedures and Characterization Data | S3  |
| 4. Control Experiments                               | S25 |
| 5. X-ray crystal Data                                | S30 |
| 6. NMR Spectrum                                      | S34 |
| 7. References                                        | S75 |

## 1. General Experiment Information and Materials

All commercial reagents were used without further purification unless otherwise noted. Solvents were freshly dried according to *the purification handbook Purification of Laboratory Chemicals* before using. All of *p*-QMs **1**<sup>1</sup> and 4-aryl or 5-aryl salicylic aldehyde<sup>2</sup> were prepared according to literature procedure. Proton and carbon magnetic resonance spectra (<sup>1</sup>H NMR and <sup>13</sup>C NMR) were recorded on a Bruker Avance 500MHz spectrometer. Tetramethylsilane (TMS) served as the internal standard for <sup>1</sup>H NMR, and CDCl<sub>3</sub> served as the internal standard for <sup>13</sup>C NMR. <sup>1</sup>H NMR data were reported as follows: chemical shift, multiplicity (s = singlet, d = doublet, t = triplet, m = multiplet, td = triplet of doublet, dt = doublet of triplet, dd = doublet of doublet), coupling constants (Hz), and integration. Infrared Spectroscopy was conducted on Thermo Fisher Nicolet is10. The X-ray single-crystal diffraction was performed on Saturn 724+ instrument. High resolution mass spectra were obtained on an Ultima Global spectrometer with an ESI source.

## 2. Investigation of water effect

**Table S1 Screening of reaction conditions <sup>a</sup>**

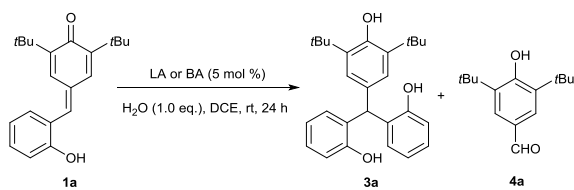

| Entry | Acids                | Yield ( <b>3a</b> , %) <sup>b</sup> |
|-------|----------------------|-------------------------------------|
| 1     | InCl <sub>3</sub>    | 60                                  |
| 2     | In(OAc) <sub>3</sub> | nr                                  |
| 3     | HfCl <sub>4</sub>    | 54                                  |
| 4     | Sc(OTf) <sub>3</sub> | 62                                  |
| 5     | AgBF <sub>4</sub>    | 49                                  |
| 6     | AgSbF <sub>6</sub>   | 25                                  |

<sup>a</sup> Reaction conditions: **1a** (0.1 mmol) and Lewis acid (5 mol %) in DCE (1.0 mL) at room temperature for 24 h, DCE removing water with CaH<sub>2</sub>. <sup>b</sup> Isolated yield. DCE = 1,2-dichloroethane, nr = no reaction.

### 3. Experimental Procedures and Characterization Data

#### A) Synthesis of *ortho*-hydroxyphenyl-substituted *para*-quinone methides (*p*-QMs)

1:

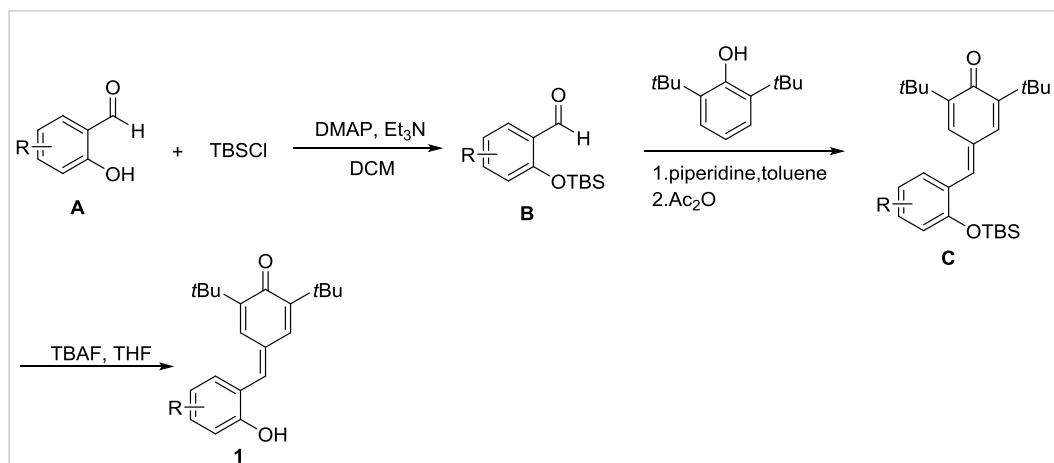

**General procedure I:** To an oven-dried reaction tube was added 2-hydroxybenzaldehyde **A** (8 mmol, 1.0 equiv) and DMAP (0.4 mmol, 5 mol%) in CH<sub>2</sub>Cl<sub>2</sub> (0.2 M, 40 mL), which was sealed at room temperature. Then TBSCl (8.8 mmol, 1.1 equiv) was added by dropwise slowly. The solvent was stirred overnight, and a saturated NaHCO<sub>3</sub> solution was added dropwise to quench the reaction. The resulting solution was extracted with CH<sub>2</sub>Cl<sub>2</sub> (3×10 mL). Then the combined organic phases were washed with brine and dried over anhydrous Na<sub>2</sub>SO<sub>4</sub>, resulting crude product **S2** and used directly in the next step without purification.

A solution of aldehydes **B** (7.2 mmol, 1.0 equiv) and phenols (7.92mmol, 1.1 equiv) in toluene (0.2 M, 36 mL) was placed in a Dean-Stark apparatus, and the solution was heated to reflux. Piperidine (14.4 mmol, 2.0 equiv) was added dropwise slowly. Then, the solution was stirred at 140 °C for 12 h. Then the reaction mixture was cooled to 120 °C, and acetic anhydride (14.4 mmol, 2.0 equiv) was dropwise added. After stirring for 30 min, the solution was poured on ice-water and extracted with CH<sub>2</sub>Cl<sub>2</sub> (3×30 mL). The organic phases were combined, washed with brine and dried over anhydrous Na<sub>2</sub>SO<sub>4</sub>. Then the solvent was evaporated under reduced pressure and the corresponding products **C** were obtained after flash column chromatography (PE/ethyl acetate = 100/1).

To a solution of **C** (3.96 mmol, 1.0 equiv) in THF (0.2M, 20 mL) at 0 °C was added

tetrabutylammonium fluoride trihydrate (TBAF) (4.36 mmol, 1.1 equiv). The reaction mixture was stirred for 15 minutes and a saturated NH<sub>4</sub>Cl solution was added dropwise to quench the reaction. The resulting solution was extracted with ethyl acetate (3×10 mL). Then the combined organic phases were washed with brine and dried over anhydrous Na<sub>2</sub>SO<sub>4</sub>. The solvent was removed to give the crude product which was purified by flash column chromatography (PE/ethyl acetate = 80/1 to 10/1) to afford the desired compounds **1**.

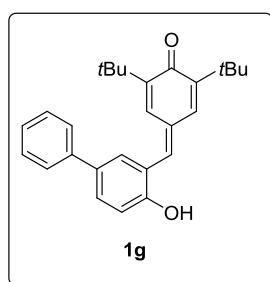

**2,6-di-tert-butyl-4-((4-hydroxy-[1,1'-biphenyl]-3-yl)methylene)cyclohexa-2,5-dien-1-one (1g)**: Prepared according to the general procedure **I** above and obtained as yellow solid (0.93 g, 35% yield for 4 steps), melting point: 159-160 °C; <sup>1</sup>H NMR (500 MHz, DMSO-*d*<sub>6</sub>) δ 10.47 (s, 1H), 7.65 – 7.55 (m, 6H), 7.42 (t, *J* = 7.5 Hz, 2H), 7.29 (t, *J* = 7.5 Hz, 1H), 7.25 (d, *J* = 1.0 Hz, 1H), 7.06 (d, *J* = 9.0 Hz, 1H), 1.25 (d, *J* = 20.5 Hz, 18H) ppm; <sup>13</sup>C NMR (125 MHz, DMSO-*d*<sub>6</sub>) δ 185.6, 156.6, 147.6, 146.1, 140.9, 139.4, 135.6, 131.2, 130.1, 129.7, 129.3, 128.90, 128.3, 126.8, 125.9, 122.9, 116.5, 34.9, 34.6, 29.3, 29.2 ppm.

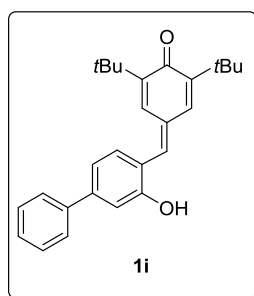

**2,6-di-tert-butyl-4-((3-hydroxy-[1,1'-biphenyl]-4-yl)methylene)cyclohexa-2,5-dien-1-one (1i)**: Prepared according to the general procedure **I** above and obtained as yellow solid (0.98g, 36% yield for 4 steps), melting point: 232-233 °C; <sup>1</sup>H NMR (500 MHz, DMSO-*d*<sub>6</sub>) δ 10.41 (s, 1H), 7.66 – 7.63 (m, 3H), 7.54 (s, 1H), 7.50 – 7.47 (m, 3H), 7.40 (t, *J* = 7.5 Hz, 1H), 7.26-7.23 (m, 3H), 1.28 (d, *J* = 13.0 Hz, 18H) ppm; <sup>13</sup>C

NMR (125 MHz, DMSO-*d*<sub>6</sub>)  $\delta$  185.7, 157.5, 147.6, 145.9, 143.1, 140.5, 139.2, 135.7, 132.0, 129.8, 129.0, 128.3, 128.0, 126.5, 121.9, 117.9, 113.7, 35.0, 34.7, 29.3, 29.2 ppm.

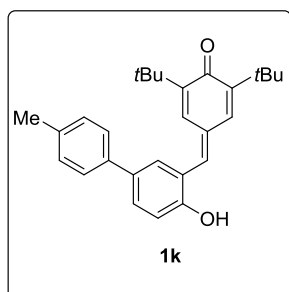

**2,6-di-tert-butyl-4-((4-hydroxy-4'-methyl-[1,1'-biphenyl]-3-yl)methylene)cyclohexa-2,5-dien-1-one (1k):** Prepared according to the general procedure I above and obtained as yellow solid (1.5 g, 39% yield for 4 steps), melting point: 190-192 °C; <sup>1</sup>H NMR (500 MHz, DMSO-*d*<sub>6</sub>)  $\delta$  10.36 (s, 1H), 7.64 (s, 1H), 7.59 (d, *J* = 7.5 Hz, 3H), 7.50 (d, *J* = 8.0 Hz, 2H), 7.26 – 7.23 (m, 3H), 7.03 (d, *J* = 8.0 Hz, 1H), 2.31 (s, 3H), 1.26 (d, *J* = 20.0 Hz, 18H) ppm; <sup>13</sup>C NMR (125 MHz, DMSO-*d*<sub>6</sub>)  $\delta$  185.7, 156.4, 147.6, 146.1, 140.9, 136.6, 136.1, 135.7, 131.2, 130.1, 129.5, 129.44, 129.0, 128.3, 125.7, 122.8, 116.5, 34.7, 34.7, 29.3, 29.2, 20.5 ppm.

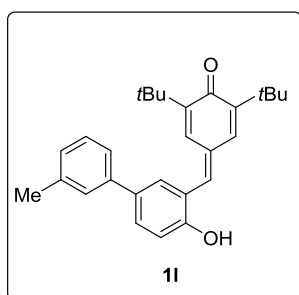

**2,6-di-tert-butyl-4-((4-hydroxy-3'-methyl-[1,1'-biphenyl]-3-yl)methylene)cyclohexa-2,5-dien-1-one (1l):** Prepared according to the general procedure I above and obtained as yellow solid (1.3 g, 34% yield for 4 steps), melting point: 170-171 °C; <sup>1</sup>H NMR (500 MHz, DMSO-*d*<sub>6</sub>)  $\delta$  10.43 (s, 1H), 7.65 (s, 1H), 7.61 – 7.59 (m, 3H), 7.43 – 7.39 (m, 2H), 7.31 (t, *J* = 7.5 Hz, 1H), 7.26 (d, *J* = 1.5 Hz, 1H), 7.12 (d, *J* = 7.0 Hz, 1H), 7.04 (d, *J* = 8.5 Hz, 1H), 2.34 (s, 3H), 1.27 (d, *J* = 9.0 Hz, 18H) ppm; <sup>13</sup>C NMR (125 MHz, DMSO-*d*<sub>6</sub>)  $\delta$  185.7, 156.6, 147.6, 146.1, 140.8, 139.4, 138.0, 135.7, 131.3,

130.0, 129.6, 129.4, 128.8, 128.3, 127.5, 126.7, 122.7, 122.8, 116.4, 35.0, 34.7, 29.3, 29.2, 21.0 ppm.

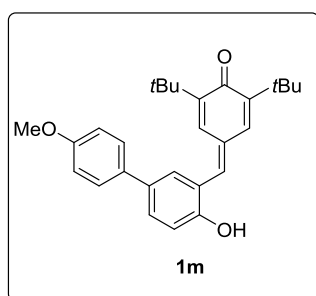

**2,6-di-tert-butyl-4-((4-hydroxy-4'-methoxy-[1,1'-biphenyl]-3-yl)methylene)cyclohexa-2,5-dien-1-one (1m)**: Prepared according to the general procedure **I** above and obtained as yellow solid (1.26 g, 30% yield for 4 steps), melting point: 195-196 °C;  $^1\text{H}$  NMR (500 MHz, DMSO- $d_6$ )  $\delta$  10.29 (s, 1H), 7.64 (s, 1H), 7.58 – 7.53 (m, 5H), 7.26 (s, 1H), 7.04 – 6.99 (m, 3H), 3.78 (s, 3H), 1.27 (d,  $J = 18.1$  Hz, 18H) ppm;  $^{13}\text{C}$  NMR (125 MHz, DMSO- $d_6$ )  $\delta$  183.8, 156.6, 154.3, 145.8, 144.3, 139.2, 133.9, 130.1, 129.2, 128.2, 127.5, 126.9, 126.5, 125.1, 121.0, 114.6, 112.5, 53.3, 33.2, 32.8, 27.5, 27.4 ppm.

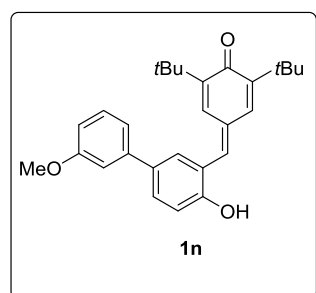

**2,6-di-tert-butyl-4-((4-hydroxy-3'-methoxy-[1,1'-biphenyl]-3-yl)methylene)cyclohexa-2,5-dien-1-one (1n)**: Prepared according to the general procedure **I** above and obtained as yellow solid (1.1 g, 26% yield for 4 steps), melting point: 168-169 °C;  $^1\text{H}$  NMR (500 MHz, DMSO- $d_6$ )  $\delta$  10.43 (s, 1H), 7.64 – 7.62 (m, 3H), 7.58 (d,  $J = 1.0$  Hz, 1H), 7.33 (t,  $J = 8.0$  Hz, 1H), 7.26 (s, 1H), 7.17 (d,  $J = 7.5$  Hz, 1H), 7.13 (s, 1H), 7.05 (d,  $J = 8.5$  Hz, 1H), 6.87 (dd,  $J = 8.1, 1.9$  Hz, 1H), 3.80 (s, 3H), 1.27 (d,  $J = 17.0$  Hz, 18H) ppm;  $^{13}\text{C}$  NMR (125 MHz, DMSO- $d_6$ )  $\delta$  185.7, 159.7, 156.8, 147.6, 146.1, 141.0, 140.9, 135.7, 131.1, 130.1, 129.9, 129.8, 129.3, 128.3, 122.8, 118.3, 116.4, 112.7, 111.2, 55.1, 35.0, 34.7, 29.3, 29.2 ppm.

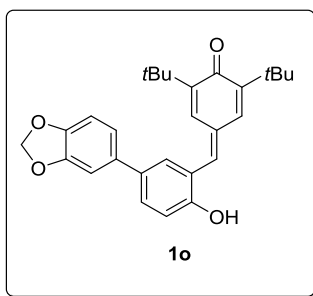

**4-(5-(benzo[d][1,3]dioxol-5-yl)-2-hydroxybenzylidene)-2,6-di-tert-butylcyclohexa-2,5-dien-1-one (1o):** Prepared according to the general procedure **I** above and obtained as yellow solid (1.64 g, 38% yield for 4 steps), melting point: 175-176 °C;  $^1\text{H}$  NMR (500 MHz,  $\text{DMSO-}d_6$ )  $\delta$  10.33 (s, 1H), 7.62 (s, 1H), 7.57 – 7.53 (m, 3H), 7.26 (d,  $J = 1.5$  Hz, 1H), 7.16 (d,  $J = 1.5$  Hz, 1H), 7.07 (dd,  $J = 8.1, 1.6$  Hz, 1H), 7.01 (d,  $J = 8.0$  Hz, 1H), 6.96 (d,  $J = 8.0$  Hz, 1H), 6.04 (s, 2H), 1.27 (d,  $J = 18.0$  Hz, 18H) ppm;  $^{13}\text{C}$  NMR (126 MHz,  $\text{DMSO-}d_6$ )  $\delta$  185.6, 156.3, 147.9, 147.6, 146.4, 146.1, 140.9, 135.7, 133.9, 131.1, 130.1, 129.5, 129.0, 128.3, 122.7, 119.3, 116.4, 108.6, 106.5, 101.1, 35.0, 34.7, 29.3, 29.2 ppm.

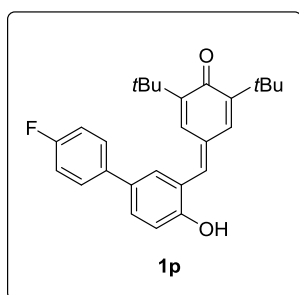

**2,6-di-tert-butyl-4-((4'-fluoro-4-hydroxy-[1,1'-biphenyl]-3-yl)methylene)cyclohexa-2,5-dien-1-one (1p):** Prepared according to the general procedure **I** above and obtained as yellow solid (1.4 g, 35% yield for 4 steps), melting point: 142-143 °C;  $^1\text{H}$  NMR (500 MHz,  $\text{DMSO-}d_6$ )  $\delta$  10.39 (s, 1H), 7.65 – 7.55 (m, 6H), 7.25 (t,  $J = 8.0$  Hz, 3H), 7.04 (d,  $J = 8.0$  Hz, 1H), 1.26 (d,  $J = 24.5$  Hz, 18H) ppm;  $^{13}\text{C}$  NMR (125 MHz,  $\text{DMSO-}d_6$ )  $\delta$  185.6, 161.4 (d,  $J = 243.7$  Hz), 156.5, 147.6, 146.0, 140.8, 136.0, 135.6, 130.2 (d,  $J = 7.8$  Hz), 129.6, 129.3, 128.3, 127.8, 127.7, 122.9, 116.5, 115.7 (d,  $J = 21.3$  Hz), 35.0, 34.7, 29.3, 29.2 ppm.



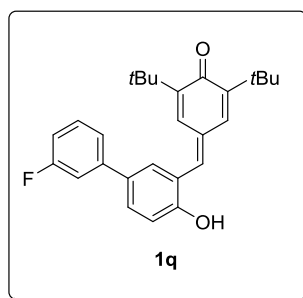

**2,6-di-tert-butyl-4-((3'-fluoro-4-hydroxy-[1,1'-biphenyl]-3-yl)methylene)cyclohexa-2,5-dien-1-one (1q):** Prepared according to the general procedure I above and obtained as yellow solid (1.52 g, 38% yield for 4 steps), melting point: 200-201 °C; <sup>1</sup>H NMR (500 MHz, DMSO-*d*<sub>6</sub>) δ 10.50 (s, 1H), 7.69 – 7.61 (m, 3H), 7.56 (s, 1H), 7.49 – 7.44 (m, 3H), 7.27 (d, *J* = 2.0 Hz, 1H), 7.16 – 7.10 (m, 1H), 7.06 (d, *J* = 8.0 Hz, 1H), 1.27 (d, *J* = 22.0 Hz, 18H) ppm; <sup>13</sup>C NMR (125 MHz, DMSO-*d*<sub>6</sub>) δ 185.7, 162.7 (d, *J* = 243.2 Hz), 157.0, 147.6, 146.2, 142.0 (d, *J* = 7.7 Hz), 140.6, 135.6, 130.8, 130.7, 130.3, 129.7, 129.5, 128.3, 122.9, 121.8 (d, *J* = 2.3 Hz), 116.5, 113.4 (d, *J* = 21.0 Hz), 112.6 (d, *J* = 21.0 Hz), 35.0, 34.7, 29.3, 29.2 ppm.

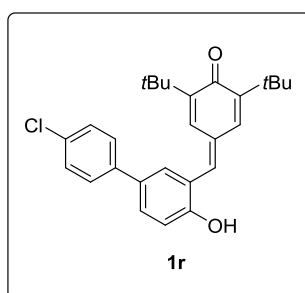

**2,6-di-tert-butyl-4-((4'-chloro-4-hydroxy-[1,1'-biphenyl]-3-yl)methylene)cyclohexa-2,5-dien-1-one (1r):** Prepared according to the general procedure I above and obtained as yellow solid (1.05 g, 25% yield for 4 steps), melting point: 174-175 °C; <sup>1</sup>H NMR (500 MHz, DMSO-*d*<sub>6</sub>) δ 10.48 (s, 1H), 7.64– 7.60 (m, 5H), 7.53 (d, *J* = 1.5 Hz, 1H), 7.47 (d, *J* = 8.5 Hz, 2H), 7.25 (d, *J* = 2.0 Hz, 1H), 7.05 (d, *J* = 8.5 Hz, 1H), 1.25 (d, *J* = 27.0 Hz, 18H) ppm; <sup>13</sup>C NMR (125 MHz, DMSO-*d*<sub>6</sub>) δ 185.6, 156.8, 147.6, 146.2, 140.7, 138.3, 135.6, 131.6, 130.3, 129.8, 129.6, 129.31, 128.8, 128.3, 127.6, 123.0, 116.5, 35.0, 34.7, 29.3, 29.2 ppm.

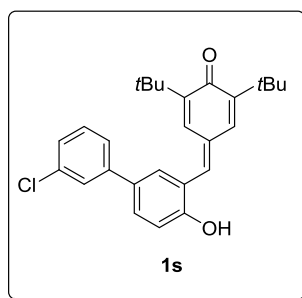

**2,6-di-tert-butyl-4-((3'-chloro-4-hydroxy-[1,1'-biphenyl]-3-yl)methylene)cyclohexa-2,5-dien-1-one (1s):** Prepared according to the general procedure **I** above and obtained as yellow solid (0.95 g, 22% yield for 4 steps), melting point: 212-213 °C; <sup>1</sup>H NMR (500 MHz, DMSO-*d*<sub>6</sub>) δ 10.51 (s, 1H), 7.66– 7.63 (m, 4H), 7.60 – 7.57 (m, 2H), 7.46 (t, *J* = 8.0 Hz, 1H), 7.36 (d, *J* = 7.5 Hz, 1H), 7.27 (d, *J* = 1.5 Hz, 1H), 7.06 (d, *J* = 8.0 Hz, 1H), 1.27 (d, *J* = 15.5 Hz, 18H) ppm; <sup>13</sup>C NMR (126 MHz, DMSO) δ 186.2, 157.6, 148.1, 146.7, 142.1, 141.0, 136.1, 134.2, 131.2, 130.8, 130.2, 130.1, 130.1, 128.8, 127.1, 126.2, 125.0, 123.5, 117.0, 35.5, 35.2, 29.8, 29.7 ppm.

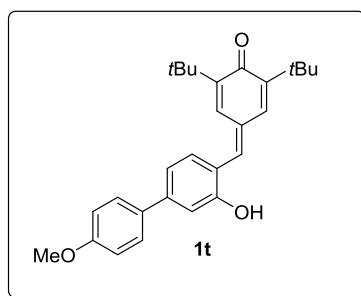

**2,6-di-tert-butyl-4-((3-hydroxy-4'-methoxy-[1,1'-biphenyl]-4-yl)methylene)cyclohexa-2,5-dien-1-one (1t):** Prepared according to the general procedure **I** above and obtained as yellow solid (1.14 g, 27% yield for 4 steps), melting point: 248-249 °C; <sup>1</sup>H NMR (500 MHz, DMSO-*d*<sub>6</sub>) δ 10.36 (s, 1H), 7.66 – 7.58 (m, 3H), 7.55 (s, 1H), 7.46 (d, *J* = 8.0 Hz, 1H), 7.29 – 7.16 (m, 3H), 7.05 (d, *J* = 8.5 Hz, 2H), 3.81 (s, 3H), 1.28 (d, *J* = 11.5 Hz, 18H) ppm; <sup>13</sup>C NMR (125 MHz, DMSO-*d*<sub>6</sub>) δ 186.1, 159.9, 158.0, 148.0, 146.3, 143.4, 141.1, 136.2, 132.4, 131.9, 130.0, 128.8, 128.17, 121.7, 117.9, 115.0, 113.6, 55.7, 35.5, 35.1, 29.8, 29.7 ppm.

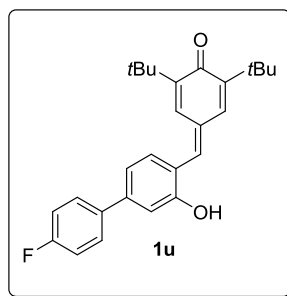

**2,6-di-tert-butyl-4-((4'-fluoro-3-hydroxy-[1,1'-biphenyl]-4-yl)methylene)cyclohexa-2,5-dien-1-one (1u):** Prepared according to the general procedure I above and obtained as yellow solid (1.48 g, 37% yield for 4 steps), melting point: 247-248 °C;  $^1\text{H}$  NMR (500 MHz,  $\text{DMSO-}d_6$ )  $\delta$  10.42 (s, 1H), 7.70 – 7.68 (m, 2H), 7.62 (s, 1H), 7.53 (s, 1H), 7.47 (d,  $J = 8.5$  Hz, 1H), 7.32 (t,  $J = 8.5$  Hz, 2H), 7.24 – 7.22 (m, 2H), 7.19 (s, 1H), 1.27 (d,  $J = 13.5$  Hz, 18H) ppm;  $^{13}\text{C}$  NMR (125 MHz,  $\text{DMSO-}d_6$ )  $\delta$  185.8, 162.1 (d,  $J = 245.8$  Hz), 157.4, 147.6, 146.0, 142.0, 140.4, 135.7, 132.0, 130.0, 128.6, 128.5, 128.2, 121.9, 117.9, 115.9 (d,  $J = 21.5$ Hz), 113.7, 35.0, 34.6, 29.3, 29.2 ppm.

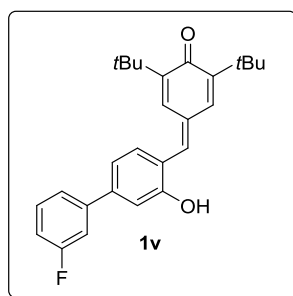

**2,6-di-tert-butyl-4-((3'-fluoro-3-hydroxy-[1,1'-biphenyl]-4-yl)methylene)cyclohexa-2,5-dien-1-one (1v):** Prepared according to the general procedure I above and obtained as yellow solid (1.37 g, 34% yield for 4 steps), melting point: 243-244 °C;  $^1\text{H}$  NMR (500 MHz,  $\text{DMSO-}d_6$ )  $\delta$  7.60 (s, 1H), 7.51 – 7.46 (m, 5H), 7.27 – 7.21 (m, 4H), 1.25 (d,  $J = 13.5$  Hz, 18H) ppm;  $^{13}\text{C}$  NMR (125 MHz,  $\text{DMSO-}d_6$ )  $\delta$  186.2, 163.1 (d,  $J = 244.1$  Hz), 157.9, 148.2, 146.5, 142.3 (d,  $J = 7.8$  Hz), 142.1, 140.8, 136.2, 132.5, 131.5 (d,  $J = 8.4$  Hz), 130.5, 128.7, 123.1, 123.0, 118.5, 115.2 (d,  $J = 21.1$  Hz), 114.4, 113.7 (d,  $J = 22.1$  Hz), 35.5, 35.2, 29.8, 29.7 ppm.

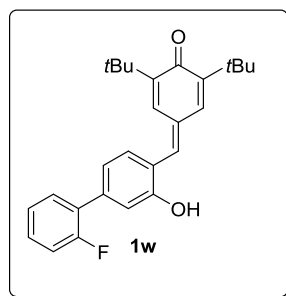

**2,6-di-tert-butyl-4-((2'-fluoro-3-hydroxy-[1,1'-biphenyl]-4-yl)methylene)cyclohexa-2,5-dien-1-one (1w):** Prepared according to the general procedure **I** above and obtained as yellow solid (1.3 g, 31% yield for 4 steps), melting point: 230-232 °C; <sup>1</sup>H NMR (500 MHz, DMSO-*d*<sub>6</sub>) δ 10.42 (s, 1H), 7.62 (s, 1H), 7.57 – 7.54 (m, 2H), 7.49 (d, *J* = 8.0 Hz, 1H), 7.46 – 7.43 (m, 1H), 7.35 – 7.30 (m, 2H), 7.26 (d, *J* = 2.0 Hz, 1H), 7.17 (s, 1H), 7.13 (d, *J* = 8.0 Hz, 1H), 1.27 (d, *J* = 14.5 Hz, 18H) ppm; <sup>13</sup>C NMR (125 MHz, DMSO-*d*<sub>6</sub>) δ 185.7, 159.1 (d, *J* = 247.1 Hz), 156.9, 147.7, 146.1, 140.3, 137.9, 135.7, 131.6, 130.4 (d, *J* = 3.2 Hz), 130.0, 130.0 (d, *J* = 8.4 Hz), 128.2, 127.4 (d, *J* = 12.7 Hz), 125.0 (d, *J* = 3.4 Hz), 122.2, 119.9 (d, *J* = 2.3 Hz), 116.2 (d, *J* = 22.7 Hz), 116.1 (d, *J* = 3.4 Hz), 35.0, 34.7, 29.3, 29.2 ppm.

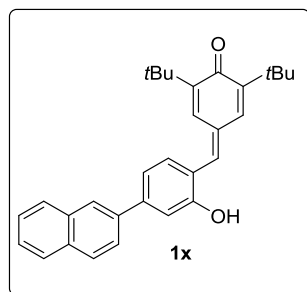

**2,6-di-tert-butyl-4-(2-hydroxy-4-(naphthalen-2-yl)benzylidene)cyclohexa-2,5-dien-1-one (1x):** Prepared according to the general procedure **I** above and obtained as yellow solid (1.57 g, 36% yield for 4 steps), melting point: 263-265 °C; <sup>1</sup>H NMR (500 MHz, DMSO-*d*<sub>6</sub>) δ 10.47 (s, 1H), 8.23 (s, 1H), 8.02 (d, *J* = 8.0 Hz, 2H), 7.95 (d, *J* = 7.3 Hz, 1H), 7.82 (d, *J* = 8.5 Hz, 1H), 7.66 (s, 1H), 7.61 – 7.50 (m, 4H), 7.45 – 7.35 (m, 2H), 7.26 (d, *J* = 0.5 Hz, 1H), 1.28 (d, *J* = 9.5 Hz, 18H) ppm; <sup>13</sup>C NMR (125 MHz, DMSO-*d*<sub>6</sub>) δ 186.2, 158.0, 148.1, 146.5, 143.4, 141.0, 137.1, 136.2, 133.7, 133.0, 132.5, 130.4, 129.1, 128.8, 128.0, 127.0, 126.9, 125.9, 125.2, 122.5, 118.7, 114.5, 35.5, 35.2, 29.8, 29.7 ppm.

## B) Synthesis of triarylmethanes (TRAMs)

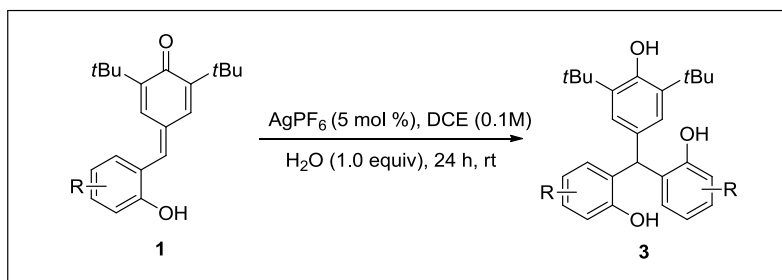

**General Procedure II:** To an oven-dried reaction tube was added *p*-QMs **1** (0.1 mmol) and AgPF<sub>6</sub> (5 mol %), and DCE (1.0 mL) was added, Then H<sub>2</sub>O (0.1 mmol) was added by dropwise slowly. The mixture was stirred for 24 h at room temperature. Purification of mixture by column chromatography on silica gel (PE/EA = 5:1 as eluent) gave the desired product **3**.

**Large-scale Reaction:** To an oven-dried reaction tube was added *p*-QMs **1a** (1.0 g, 3.2 mmol) and AgPF<sub>6</sub> (5 mol %), and DCE (32 mL) was added, Then H<sub>2</sub>O (58 μL, 3.2 mmol) was added by dropwise slowly. The mixture was stirred for 24 h at room temperature. Purification of mixture by column chromatography on silica gel (PE/EA = 5:1 as eluent) gave the desired product **3a** (0.65 g, 90% yield).

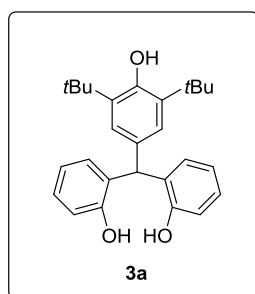

**2,2'-((3,5-di-tert-butyl-4-hydroxyphenyl)methylene)diphenol (3a):** Prepared according to the general procedure **II** above and obtained as yellow solid (37.2 mg, 92% yield), melting point: 161-162 °C; <sup>1</sup>H NMR (500 MHz, DMSO-*d*<sub>6</sub>) δ 9.14 (s, 2H), 6.99-6.96 (m, 2H), 6.77 (s, 2H), 6.74 (d, *J* = 7.5 Hz, 2H), 6.68 (s, 1H), 6.66 (d, *J* = 4.0 Hz, 4H), 5.94 (s, 1H), 1.28 (s, 18H) ppm; <sup>13</sup>C NMR (125 MHz, DMSO-*d*<sub>6</sub>) δ=154.6, 151.5, 138.4, 134.4, 131.0, 129.4, 126.5, 125.2, 118.2, 114.8, 42.2, 34.4, 30.4 ppm; IR (KBr, cm<sup>-1</sup>): 3633, 2956, 1594, 1484, 1453, 1434, 1277, 1233, 1023, 820, 756; HRMS (ESI) calcd for C<sub>27</sub>H<sub>31</sub>O<sub>3</sub><sup>-</sup> [M-H]<sup>-</sup>: 403.2279, found: 403.2280.

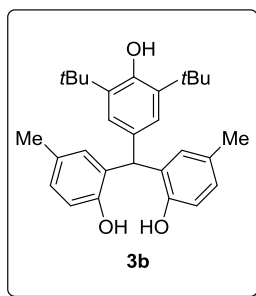

**2,2'-((3,5-di-tert-butyl-4-hydroxyphenyl)methylene)bis(4-methylphenol) (3b):**

Prepared according to the general procedure **II** above and obtained as colorless oil (42 mg, 97% yield);  $^1\text{H}$  NMR (500 MHz,  $\text{DMSO-}d_6$ )  $\delta$  8.87 (s, 2H), 6.80– 6.77 (m, 4H), 6.67 (s, 1H), 6.62 (d,  $J = 8.0$  Hz, 2H), 6.53 (s, 2H), 5.87 (s, 1H), 2.08 (s, 6H), 1.29 (s, 18H) ppm;  $^{13}\text{C}$  NMR (125 MHz,  $\text{DMSO-}d_6$ )  $\delta$  152.4, 151.5, 138.3, 134.3, 130.8, 129.9, 126.8, 126.2, 125.3, 114.7, 42.2, 34.4, 30.4, 20.5 ppm; IR (KBr,  $\text{cm}^{-1}$ ): 3643, 2956, 2924, 1610, 1506, 1434, 1232, 1034, 814, 769; HRMS (ESI) calcd for  $\text{C}_{29}\text{H}_{35}\text{O}_3$   $[\text{M-H}]^-$  : 431.2592, found: 431.2590.

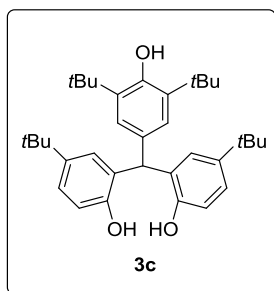

**2,2'-((3,5-di-tert-butyl-4-hydroxyphenyl)methylene)bis(4-(tert-butyl)phenol) (3c):**

Prepared according to the general procedure **II** above and obtained as yellow solid (40 mg, 78% yield), melting point: 108-109  $^{\circ}\text{C}$ ,  $^1\text{H}$  NMR (500 MHz,  $\text{DMSO-}d_6$ )  $\delta$  8.92 (s, 2H), 6.95 (dd,  $J = 8.3, 2.2$  Hz, 2H), 6.87 – 6.86 (m, 4H), 6.68 (s, 1H), 6.64 (d,  $J = 8.5$  Hz, 2H), 6.00 (s, 1H), 1.30 (s, 18H), 1.11 (s, 18H) ppm;  $^{13}\text{C}$  NMR (125 MHz,  $\text{DMSO-}d_6$ )  $\delta$  152.1, 151.4, 139.8, 138.4, 134.5, 130.1, 126.6, 125.3, 122.6, 114.3, 41.7, 34.4, 33.5, 31.3, 30.4 ppm; IR (KBr,  $\text{cm}^{-1}$ ): 3636, 2956, 2868, 1609, 1508, 1427, 1231, 1202, 824, 765; HRMS (ESI) calcd for  $\text{C}_{35}\text{H}_{47}\text{O}_3$   $[\text{M-H}]^-$  : 515.3531, found: 515.3523.

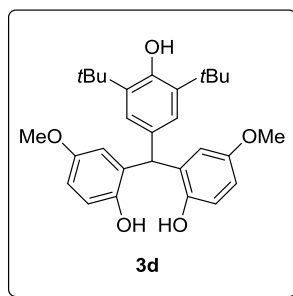

**2,2'-((3,5-di-tert-butyl-4-hydroxyphenyl)methylene)bis(4-methoxyphenol) (3d):** Prepared according to the general procedure **II** above and obtained as colorless oil (20 mg, 43% yield);  $^1\text{H}$  NMR (500 MHz,  $\text{DMSO-}d_6$ )  $\delta$  8.74 (s, 2H), 6.81 (s, 2H), 6.74 (s, 1H), 6.66 (d,  $J = 8.5$  Hz, 2H), 6.60– 6.58 (m, 2H), 6.24 (s, 2H), 5.84 (s, 1H), 3.54 (s, 6H), 1.30 (s, 18H) ppm;  $^{13}\text{C}$  NMR (125 MHz,  $\text{DMSO-}d_6$ )  $\delta$  151.7, 151.7, 148.6, 138.5, 133.8, 132.0, 125.1, 116.0, 115.1, 110.7, 55.1, 42.8, 34.4, 30.4 ppm; IR (KBr,  $\text{cm}^{-1}$ ), 3606, 2958, 1590, 1502, 1431, 1275, 1235, 1148, 1040, 818, 721; HRMS (ESI) calcd for  $\text{C}_{29}\text{H}_{35}\text{O}_5$   $[\text{M-H}]^-$ : 463.2490, found: 463.2490.

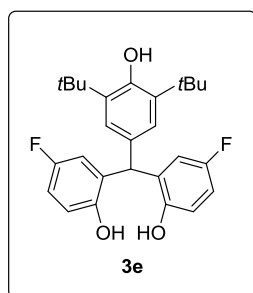

**2,2'-((3,5-di-tert-butyl-4-hydroxyphenyl)methylene)bis(4-fluorophenol) (3e):** Prepared according to the general procedure **II** above and obtained as colorless oil (27 mg, 63% yield);  $^1\text{H}$  NMR (500 MHz,  $\text{DMSO-}d_6$ )  $\delta$  9.30 (s, 2H), 6.87 – 6.82 (m, 3H), 6.76– 6.73 (m, 4H), 6.34 (dd,  $J = 9.9, 3.0$  Hz, 2H), 5.84 (s, 1H), 1.29 (s, 18H) ppm;  $^{13}\text{C}$  NMR (125 MHz,  $\text{DMSO-}d_6$ )  $\delta$  155.6 (d,  $J = 233.7$  Hz), 152.5, 151.4, 139.3, 133.4, 132.7 (d,  $J = 5.6$  Hz), 125.5, 116.1 (d,  $J = 7.6$  Hz), 115.8 (d,  $J = 23.6$  Hz), 113.4 (d,  $J = 22.6$  Hz), 43.4, 34.9, 30.9 ppm; IR (KBr,  $\text{cm}^{-1}$ ): 2954, 1555, 1506, 1436, 1258, 1026, 822, 760; HRMS (ESI) calcd for  $\text{C}_{27}\text{H}_{29}\text{F}_2\text{O}_3$   $[\text{M-H}]^-$  : 439.2090, found: 439.2091.

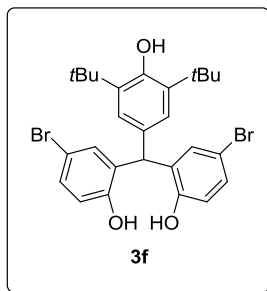

**2,2'-((3,5-di-tert-butyl-4-hydroxyphenyl)methylene)bis(4-bromophenol) (3f):**

Prepared according to the general procedure **II** above and obtained as colorless oil (18.5 mg, 33% yield);  $^1\text{H}$  NMR (500 MHz,  $\text{DMSO-}d_6$ )  $\delta$  9.66 (s, 2H), 7.19 (dd,  $J = 8.5, 2.3$  Hz, 2H), 6.84 (s, 1H), 6.77 – 6.73 (m, 4H), 6.70 (d,  $J = 2.5$  Hz, 2H), 5.80 (s, 1H), 1.30 (s, 18H) ppm;  $^{13}\text{C}$  NMR (125 MHz,  $\text{DMSO-}d_6$ )  $\delta$  154.1, 152.0, 138.9, 133.2, 132.3, 131.3, 129.6, 125.1, 117.1, 109.5, 42.9, 34.4, 30.4 ppm; IR (KBr,  $\text{cm}^{-1}$ ): 3632, 2956, 1597, 1490, 1434, 1232, 816, 769; HRMS (ESI) calcd for  $\text{C}_{27}\text{H}_{29}\text{Br}_2\text{O}_3^-[\text{M-H}]^-$  : 559.0489, found: 559.0475.

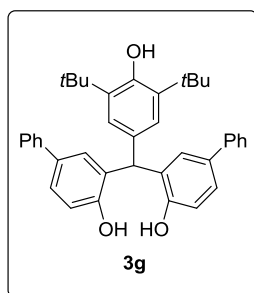

**3,3'-((3,5-di-tert-butyl-4-hydroxyphenyl)methylene)bis([1,1'-biphenyl]-4-ol) (3g):**

Prepared according to the general procedure **II** above and obtained as colorless oil (53 mg, 96% yield).  $^1\text{H}$  NMR (500 MHz,  $\text{CDCl}_3$ )  $\delta$  9.45 (s, 2H), 7.37 – 7.30 (m, 10H), 7.22 – 7.20 (m, 2H), 7.07 (d,  $J = 2.0$  Hz, 2H), 6.99 (s, 2H), 6.86 (d,  $J = 8.0$  Hz, 2H), 6.78 (s, 1H), 6.01 (s, 1H), 1.33 (s, 18H) ppm;  $^{13}\text{C}$  NMR (125 MHz,  $\text{DMSO-}d_6$ )  $\delta$  154.6, 151.8, 140.8, 138.7, 133.5, 131.3, 130.2, 128.8, 127.7, 126.2, 125.6, 125.4, 125.1, 115.5, 42.9, 34.5, 30.4 ppm; IR (KBr,  $\text{cm}^{-1}$ ): 3627, 2957, 1606, 1514, 1486, 1453, 1433, 1278, 1233, 764; HRMS (ESI) calcd for  $\text{C}_{39}\text{H}_{39}\text{O}_3^-[\text{M-H}]^-$ : 555.2905, found: 555.2897.



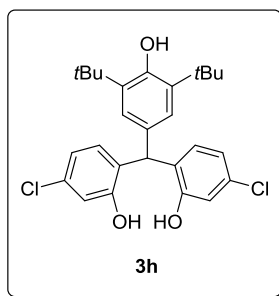

**6,6'-((3,5-di-tert-butyl-4-hydroxyphenyl)methylene)bis(3-chlorophenol) (3h):**

Prepared according to the general procedure **II** above and obtained as colorless oil (39 mg, 83% yield);  $^1\text{H NMR}$  (500 MHz,  $\text{DMSO-}d_6$ )  $\delta$  9.79 (s, 2H), 6.78 – 6.74 (m, 7H), 6.61 (d,  $J = 8.5$  Hz, 2H), 5.80 (s, 1H), 1.28 (s, 18H) ppm;  $^{13}\text{C NMR}$  (125 MHz,  $\text{DMSO-}d_6$ )  $\delta$  155.6, 151.9, 138.7, 133.1, 130.6, 130.5, 129.9, 125.0, 118.2, 114.6, 41.8, 34.4, 30.4 ppm; IR (KBr,  $\text{cm}^{-1}$ ): 3633, 2957, 1587, 1501, 1414, 1262, 1232, 856, 820; HRMS (ESI) calcd for  $\text{C}_{27}\text{H}_{29}\text{Cl}_2\text{O}_3^- [\text{M-H}]^-$ : 471.1499, found: 471.1500.

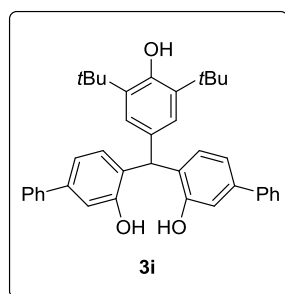

**4,4'-((3,5-di-tert-butyl-4-hydroxyphenyl)methylene)bis([1,1'-biphenyl]-3-ol) (3i):**

Prepared according to the general procedure **II** above and obtained as colorless oil (42 mg, 42% yield);  $^1\text{H NMR}$  (500 MHz,  $\text{DMSO-}d_6$ )  $\delta$  9.40 (s, 2H), 7.56 (d,  $J = 8.0$  Hz, 4H), 7.44 (t,  $J = 8.0$  Hz, 4H), 7.32 (t,  $J = 7.5$  Hz, 2H), 7.04 – 7.01 (m, 4H), 6.88 (s, 2H), 6.82 (d,  $J = 8.0$  Hz, 2H), 6.73 (s, 1H), 5.99 (s, 1H), 1.31 (s, 18H) ppm;  $^{13}\text{C NMR}$  (125 MHz,  $\text{DMSO-}d_6$ )  $\delta$  155.0, 151.70, 140.3, 138.7, 138.6, 134.0, 130.5, 129.9, 128.8, 127.1, 126.3, 125.2, 116.8, 113.1, 42.2, 34.4, 30.4 ppm; IR (KBr,  $\text{cm}^{-1}$ ): 3629, 2957, 1610, 1568, 1488, 1433, 1232, 821; HRMS (ESI) calcd for  $\text{C}_{39}\text{H}_{39}\text{O}_3^- [\text{M-H}]^-$ : 555.2905, found: 555.2896.

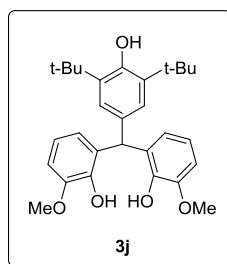

**6,6'-((3,5-di-tert-butyl-4-hydroxyphenyl)methylene)bis(2-methoxyphenol) (3j):**

Prepared according to the general procedure **II** above and obtained as yellow solid (22 mg, 47% yield), melting point: 80-82 °C; <sup>1</sup>H NMR (500 MHz, DMSO-*d*<sub>6</sub>) δ 8.31 (s, 2H), 6.77 (d, *J* = 8.0 Hz, 4H), 6.69 (s, 1H), 6.63 (t, *J* = 8.0 Hz, 2H), 6.30 (d, *J* = 7.5 Hz, 2H), 6.00 (s, 1H), 3.75 (s, 6H), 1.28 (s, 18H) ppm; <sup>13</sup>C NMR (125 MHz, DMSO-*d*<sub>6</sub>) δ 151.6, 147.0, 143.5, 138.4, 134.4, 131.3, 125.1, 121.5, 117.7, 109.3, 55.7, 42.2, 34.4, 30.4 ppm; IR (KBr, cm<sup>-1</sup>): 3622, 2957, 1610, 1479, 1434, 1275, 1214, 1025, 770, 749; HRMS (ESI) calcd for C<sub>29</sub>H<sub>35</sub>O<sub>5</sub><sup>-</sup>[M-H]<sup>-</sup>: 463.2490, found: 463.2492.

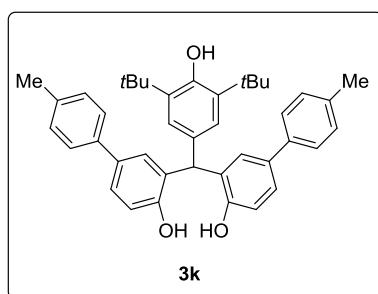

**3,3''-((3,5-di-tert-butyl-4-hydroxyphenyl)methylene)bis(4'-methyl-[1,1'-biphenyl]-4-ol) (3k):** Prepared according to the general procedure **II** above and obtained as colorless oil (52 mg, 90% yield); <sup>1</sup>H NMR (500 MHz, DMSO-*d*<sub>6</sub>) δ 9.39 (s, 2H), 7.28 – 7.23 (m, 6H), 7.14 (d, *J* = 8.0 Hz, 4H), 7.04 (s, 2H), 6.98 (s, 2H), 6.83 (d, *J* = 8.5 Hz, 2H), 6.77 (s, 1H), 6.00 (s, 1H), 2.25 (s, 6H), 1.32 (s, 18H) ppm; <sup>13</sup>C NMR (125 MHz, DMSO-*d*<sub>6</sub>) δ 154.3, 151.8, 138.6, 137.9, 135.4, 133.5, 131.3, 130.2, 129.4, 127.5, 125.5, 125.4, 124.8, 115.4, 42.7, 34.5, 30.4, 20.5 ppm; IR (KBr, cm<sup>-1</sup>): 3626, 2957, 1606, 1498, 1432, 1231, 1024, 888, 811, 762; HRMS (ESI) calcd for C<sub>41</sub>H<sub>43</sub>O<sub>3</sub><sup>-</sup>[M-H]<sup>-</sup>: 583.3218, found: 583.3210.

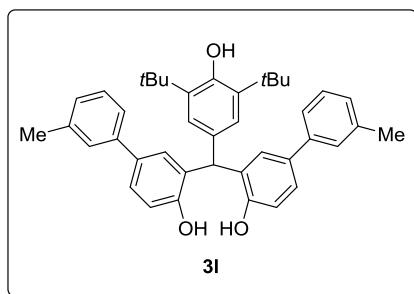

**3,3'-(3,5-di-tert-butyl-4-hydroxyphenyl)methylenebis(3'-methyl-[1,1'-biphenyl]-4-ol) (3l):** Prepared according to the general procedure **II** above and obtained as colorless oil (32 mg, 56% yield);  $^1\text{H}$  NMR (500 MHz,  $\text{DMSO-}d_6$ )  $\delta$  9.48 (s, 2H), 7.30 – 7.29 (m, 2H), 7.23 – 7.16 (m, 6H), 7.10 (s, 2H), 7.02 (d,  $J = 7.5$  Hz, 4H), 6.85 (d,  $J = 8.0$  Hz, 2H), 6.81 (s, 1H), 6.03 (s, 1H), 2.27 (s, 6H), 1.34 (s, 18H) ppm;  $^{13}\text{C}$  NMR (125 MHz,  $\text{DMSO-}d_6$ )  $\delta$  154.5, 151.8, 140.7, 138.7, 137.7, 133.4, 131.2, 130.3, 128.7, 127.8, 126.9, 126.4, 125.4, 125.1, 122.8, 115.4, 42.6, 34.5, 30.4, 21.1 ppm; IR (KBr,  $\text{cm}^{-1}$ ): 2955, 1604, 1511, 1481, 1433, 1232, 1024, 888, 824, 703; HRMS (ESI) calcd for  $\text{C}_{41}\text{H}_{43}\text{O}^3\text{[M-H]}^-$ : 583.3218, found: 583.3207.

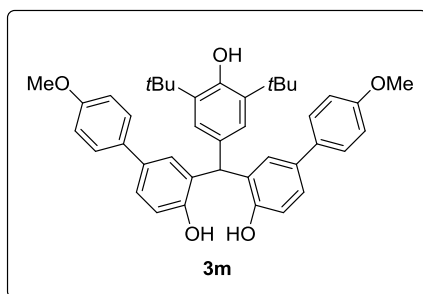

**3,3'-(3,5-di-tert-butyl-4-hydroxyphenyl)methylenebis(4'-methoxy-[1,1'-biphenyl]-4-ol) (3m):** Prepared according to the general procedure **II** above and obtained as colorless oil (22 mg, 36% yield);  $^1\text{H}$  NMR (500 MHz,  $\text{DMSO-}d_6$ )  $\delta$  9.33 (s, 2H), 7.27 (d,  $J = 8.5$  Hz, 4H), 7.24 (dd,  $J = 8.3, 2.2$  Hz, 2H), 6.99 (d,  $J = 2.0$  Hz, 2H), 6.97 (s, 2H), 6.91 (d,  $J = 8.5$  Hz, 4H), 6.81 (d,  $J = 8.0$  Hz, 2H), 6.77 (s, 1H), 5.98 (s, 1H), 3.73 (s, 6H), 1.32 (s, 18H) ppm;  $^{13}\text{C}$  NMR (125 MHz,  $\text{DMSO-}d_6$ )  $\delta$  158.0, 154.0, 151.7, 138.6, 133.6, 133.3, 131.3, 130.0, 127.2, 126.7, 125.4, 124.6, 115.4, 114.3, 55.1, 42.7, 34.5, 30.4 ppm; IR (KBr,  $\text{cm}^{-1}$ ): 3625, 2956, 1607, 1498, 1434, 1245, 1025, 822, 763; HRMS (ESI) calcd for  $\text{C}_{41}\text{H}_{43}\text{O}_5^3\text{[M-H]}^-$ : 615.3116, found: 615.3105.

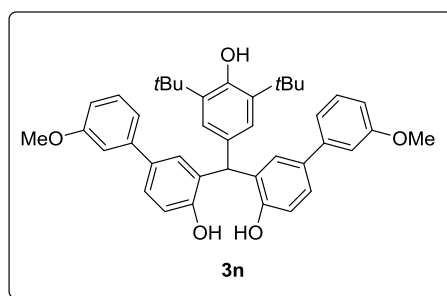

**3,3'-((3,5-di-tert-butyl-4-hydroxyphenyl)methylene)bis(3'-methoxy-[1,1'-biphenyl]-4-ol) (3n):** Prepared according to the general procedure **II** above and obtained as colorless oil (30 mg, 49% yield);  $^1\text{H NMR}$  (500 MHz,  $\text{DMSO-}d_6$ )  $\delta$  9.47 (s, 2H), 7.31 (dd,  $J = 8.2, 2.1$  Hz, 2H), 7.25 (t,  $J = 8.0$  Hz, 2H), 7.05 (d,  $J = 2.0$  Hz, 2H), 6.98 (s, 2H), 6.94 (d,  $J = 7.5$  Hz, 2H), 6.86 – 6.83 (m, 4H), 6.80 – 6.78 (m, 3H), 6.01 (s, 1H), 3.72 (s, 6H), 1.32 (s, 18H) ppm;  $^{13}\text{C NMR}$  (125 MHz,  $\text{DMSO-}d_6$ )  $\delta$  159.6, 154.7, 151.8, 142.1, 138.7, 133.4, 131.2, 130.0, 129.8, 127.7, 125.4, 125.1, 118.0, 115.4, 111.8, 111.2, 54.8, 42.6, 34.5, 30.4 ppm; IR (KBr,  $\text{cm}^{-1}$ ): 3626, 2956, 1604, 1578, 1481, 1435, 1363, 1278, 1219, 1024, 888, 824, 699; HRMS (ESI) calcd for  $\text{C}_{41}\text{H}_{43}\text{O}_5$  [M-H] $^-$ : 615.3116, found: 615.3111.

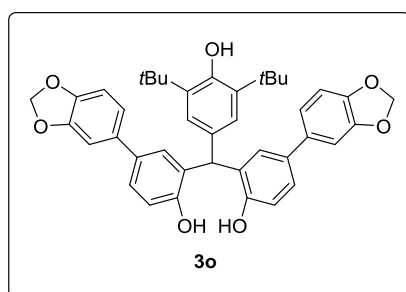

**2,2'-((3,5-di-tert-butyl-4-hydroxyphenyl)methylene)bis(4-(benzo[d][1,3]dioxol-5-yl)phenol) (3o):** Prepared according to the general procedure **II** above and obtained as colorless oil (29 mg, 45% yield).  $^1\text{H NMR}$  (500 MHz,  $\text{DMSO-}d_6$ )  $\delta$  9.46 (s, 2H), 7.23 (dd,  $J = 8.3, 1.6$  Hz, 2H), 6.95 (d,  $J = 4.0$  Hz, 4H), 6.89 – 6.85 (m, 4H), 6.81 (d,  $J = 7.5$  Hz, 5H), 5.97 (d,  $J = 2.0$  Hz, 5H), 1.32 (s, 18H) ppm;  $^{13}\text{C NMR}$  (125 MHz,  $\text{DMSO-}d_6$ )  $\delta$  154.2, 151.8, 147.8, 145.9, 138.7, 135.2, 133.4, 131.2, 130.0, 127.4, 125.4, 124.9, 118.9, 115.3, 108.6, 106.1, 100.9, 42.8, 34.5, 30.4 ppm; IR (KBr,  $\text{cm}^{-1}$ ):

3623, 2955, 1605, 1482, 1430, 1228, 1026, 859, 809, 763; HRMS (ESI) calcd for  $C_{41}H_{39}O_7[M-H]^-$ : 643.2701, found: 643.2690.

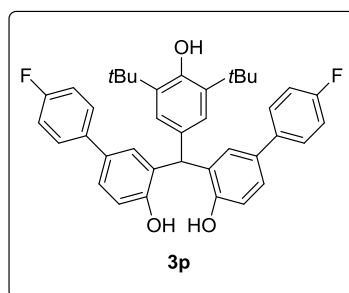

**3,3'-((3,5-di-tert-butyl-4-hydroxyphenyl)methylene)bis(4'-fluoro-[1,1'-biphenyl]-4-ol) (3p):** Prepared according to the general procedure **II** above and obtained as colorless oil (27 mg, 47% yield);  $^1H$  NMR (500 MHz,  $DMSO-d_6$ )  $\delta$  9.46 (s, 2H), 7.37 – 7.34 (m, 4H), 7.29 – 7.27 (m, 2H), 7.18 (t,  $J = 8.5$  Hz, 4H), 7.00 (d,  $J = 2.0$  Hz, 2H), 6.95 (s, 2H), 6.84 (d,  $J = 8.0$  Hz, 2H), 6.78 (s, 1H), 5.98 (s, 1H), 1.31 (s, 18H) ppm;  $^{13}C$  NMR (125 MHz,  $DMSO-d_6$ )  $\delta$  161.1 (d,  $J = 243.6$  Hz), 154.6, 151.8, 138.6, 137.3 (d,  $J = 3.0$  Hz), 133.4, 131.3, 129.3, 127.6, 127.4 (d,  $J = 8.1$  Hz), 125.4, 125.2, 115.6 (d,  $J = 21.3$  Hz), 115.5, 42.9, 34.4, 30.4 ppm; IR (KBr,  $cm^{-1}$ ): 2955, 1605, 1496, 1433, 1225, 1025, 821, 762; HRMS (ESI) calcd for  $C_{39}H_{37}F_2O_3[M-H]^-$ : 591.2716, found: 591.2708.

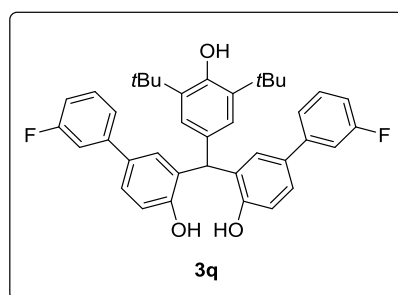

**3,3'-((3,5-di-tert-butyl-4-hydroxyphenyl)methylene)bis(3'-fluoro-[1,1'-biphenyl]-4-ol) (3q):** Prepared according to the general procedure **II** above and obtained as colorless oil (15.4 mg, 26% yield);  $^1H$  NMR (500 MHz,  $DMSO-d_6$ )  $\delta$  9.59 (s, 2H), 7.40 – 7.36 (m, 4H), 7.19 (d,  $J = 8.0$  Hz, 2H), 7.13 (d,  $J = 10.5$  Hz, 2H), 7.06 – 7.02 (m, 4H), 6.97 (s, 2H), 6.86 (d,  $J = 8.5$  Hz, 2H), 6.81 (s, 1H), 5.98 (s, 1H), 1.32 (s, 18H) ppm;  $^{13}C$  NMR (125 MHz,  $DMSO-d_6$ )  $\delta$  164.1, 162.2, 155.7, 152.4, 143.7 (d,  $J = 7.3$

Hz), 139.3, 133.7, 131.8, 131.3 (d,  $J = 8.2$  Hz), 129.2, 128.1, 125.9, 122.0, 116.0, 113.4 (d,  $J = 21.2$  Hz), 112.6 (d,  $J = 21.8$  Hz), 43.5, 35.0, 30.9 ppm; IR (KBr,  $\text{cm}^{-1}$ ): 2957, 1608, 1581, 1481, 1435, 1233, 1025, 889, 784, 695; HRMS (ESI) calcd for  $\text{C}_{39}\text{H}_{37}\text{F}_2\text{O}_3^-[\text{M-H}]^-$ : 591.2716, found: 591.2709.

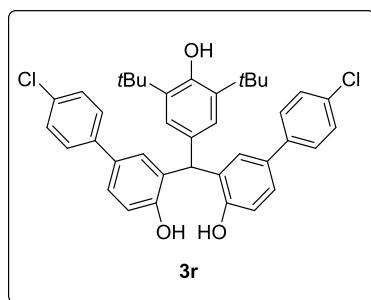

**3,3'-((3,5-di-tert-butyl-4-hydroxyphenyl)methylene)bis(4'-chloro-[1,1'-biphenyl]-4-ol) (3r)**: Prepared according to the general procedure **II** above and obtained as colorless oil (20 mg, 32% yield);  $^1\text{H}$  NMR (500 MHz,  $\text{DMSO-}d_6$ )  $\delta$  9.55 (s, 2H), 7.40 (d,  $J = 8.5$  Hz, 4H), 7.35 (d,  $J = 8.5$  Hz, 4H), 7.32 (dd,  $J = 8.2, 2.2$  Hz, 2H), 7.02 (d,  $J = 2.5$  Hz, 2H), 6.94 (s, 2H), 6.85 (d,  $J = 8.0$  Hz, 2H), 6.79 (s, 1H), 5.98 (s, 1H), 1.31 (s, 18H) ppm;  $^{13}\text{C}$  NMR (125 MHz,  $\text{DMSO-}d_6$ )  $\delta$  154.9, 151.8, 139.6, 138.7, 133.3, 131.4, 131.0, 128.9, 128.8, 127.5, 127.3, 125.3, 125.2, 115.6, 42.9, 34.5, 30.4 ppm; IR (KBr,  $\text{cm}^{-1}$ ): 3629, 2957, 1606, 1485, 1432, 1232, 1024, 818, 760; HRMS (ESI) calcd for  $\text{C}_{39}\text{H}_{37}\text{Cl}_2\text{O}_3^-[\text{M-H}]^-$ : 623.2125, found: 623.2117.

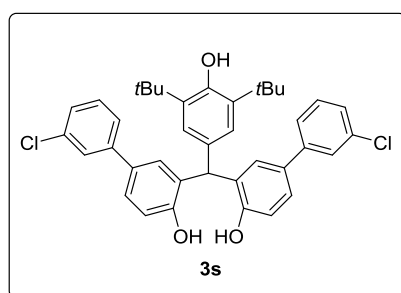

**3,3'-((3,5-di-tert-butyl-4-hydroxyphenyl)methylene)bis(3'-chloro-[1,1'-biphenyl]-4-ol) (3s)**: Prepared according to the general procedure **II** above and obtained as colorless oil (23 mg, 38% yield);  $^1\text{H}$  NMR (500 MHz,  $\text{DMSO-}d_6$ )  $\delta$  9.60 (s, 2H), 7.39 – 7.32 (m, 8H), 7.27 (d,  $J = 8.0$  Hz, 2H), 7.06 (d,  $J = 1.5$  Hz, 2H), 6.98 (s, 2H), 6.86 (d,  $J = 8.5$  Hz, 2H), 6.81 (s, 1H), 5.99 (s, 1H), 1.33 (s, 18H) ppm;  $^{13}\text{C}$  NMR (125

MHz, DMSO-*d*<sub>6</sub>)  $\delta$  155.2, 151.9, 142.8, 138.8, 133.6, 133.1, 131.3, 130.7, 128.5, 127.6, 126.0, 125.4, 125.3, 124.2, 115.6, 42.9, 34.5, 30.4 ppm; IR (KBr, cm<sup>-1</sup>): 3629, 2957, 1595, 1564, 1512, 1434, 1232, 1024, 884, 825, 695; HRMS (ESI) calcd for C<sub>39</sub>H<sub>37</sub>Cl<sub>2</sub>O<sub>3</sub><sup>-</sup>[M-H]<sup>-</sup>: 623.2125, found: 623.2112.

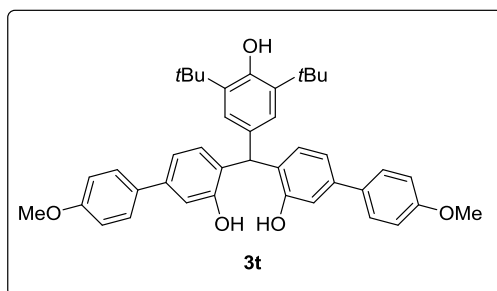

**4,4'-((3,5-di-tert-butyl-4-hydroxyphenyl)methylene)bis(4'-methoxy-[1,1'-biphenyl]-3-ol) (3t)**: Prepared according to the general procedure **II** above and obtained as colorless oil (20 mg, 33% yield); <sup>1</sup>H NMR (500 MHz, DMSO-*d*<sub>6</sub>)  $\delta$  9.32 (s, 2H), 7.49 (d, *J* = 8.5 Hz, 4H), 7.00 – 6.95 (m, 8H), 6.87 (s, 2H), 6.78 (d, *J* = 8.0 Hz, 2H), 6.73 (s, 1H), 5.95 (s, 1H), 3.78 (s, 6H), 1.31 (s, 18H) ppm; <sup>13</sup>C NMR (125 MHz, DMSO-*d*<sub>6</sub>)  $\delta$  159.1, 155.4, 152.2, 139.1, 138.8, 134.7, 133.1, 130.2, 127.8, 125.7, 116.8, 114.8, 113.1, 55.6, 42.6, 34.9, 30.9 ppm; IR (KBr, cm<sup>-1</sup>): 3634, 2949, 1607, 1501, 1431, 1405, 1231, 1046, 833; HRMS (ESI) calcd for C<sub>41</sub>H<sub>43</sub>O<sub>5</sub><sup>-</sup>[M-H]<sup>-</sup>: 615.3116, found: 615.3110.

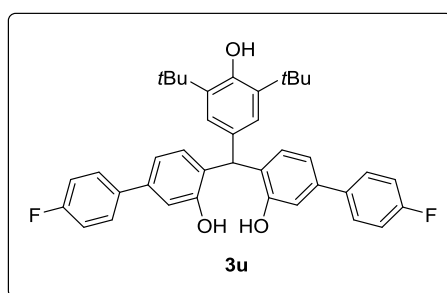

**4,4'-((3,5-di-tert-butyl-4-hydroxyphenyl)methylene)bis(4'-fluoro-[1,1'-biphenyl]-3-ol) (3u)**: Prepared according to the general procedure **II** above and obtained as colorless oil (25mg, 42% yield). <sup>1</sup>H NMR (500 MHz, DMSO-*d*<sub>6</sub>)  $\delta$  9.45 (s, 2H), 7.60 – 7.57 (m, 4H), 7.25 (t, *J* = 9.0 Hz, 4H), 7.01 – 6.98 (m, 4H), 6.87 (s, 2H), 6.80 (d, *J* = 7.5Hz, 2H), 6.75 (s, 1H), 5.97 (s, 1H), 1.31 (s, 18H) ppm; <sup>13</sup>C NMR (125 MHz,

DMSO-*d*<sub>6</sub>)  $\delta$  155.5, 152.2, 139.1, 138.2, 137.2, 134.4, 130.9, 130.4, 128.7 (d,  $J = 7.4$  Hz), 125.7, 117.2, 116.1 (d,  $J = 21.3$  Hz), 113.5, 42.6, 34.9, 30.9 ppm; IR (KBr,  $\text{cm}^{-1}$ ): 3635, 2959, 1601, 1499, 1432, 1230, 833, 811; HRMS (ESI) calcd for  $\text{C}_{39}\text{H}_{37}\text{F}_2\text{O}_3[\text{M-H}]^-$ : 591.2716, found: 591.2701.

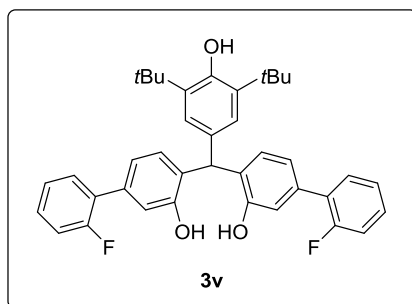

**4,4'-((3,5-di-tert-butyl-4-hydroxyphenyl)methylene)bis(2'-fluoro-[1,1'-biphenyl]-3-ol) (3v):** Prepared according to the general procedure **II** above and obtained as colorless oil (29mg, 49%);  $^1\text{H}$  NMR (500 MHz, DMSO-*d*<sub>6</sub>)  $\delta$  9.46 (s, 2H), 7.48 – 7.45 (m, 2H), 7.39 – 7.35 (m, 2H), 7.29– 7.25 (m, 4H), 6.98 (s, 2H), 6.92 – 6.87 (m, 4H), 6.83 (d,  $J = 8.0$  Hz, 2H), 6.74 (s, 1H), 6.00 (s, 1H), 1.31 (s, 18H) ppm;  $^{13}\text{C}$  NMR (125 MHz, DMSO-*d*<sub>6</sub>)  $\delta$  159.0(d,  $J = 244.3$  Hz), 154.5, 151.8, 138.6, 133.5, 130.8, 130.4, 129.5, 129.1 (d,  $J = 7.1$  Hz), 128.3, 128.2, 125.3, 124.8, 118.8, 116.1 (d,  $J = 22.7$  Hz), 115.3, 42.3, 34.4, 30.4 ppm; IR (KBr,  $\text{cm}^{-1}$ ): 3631, 2957, 1612, 1585, 1485, 1413, 1232, 1025, 812; HRMS (ESI) calcd for  $\text{C}_{39}\text{H}_{37}\text{F}_2\text{O}_3[\text{M-H}]^-$ : 591.2716, found: 591.2708.

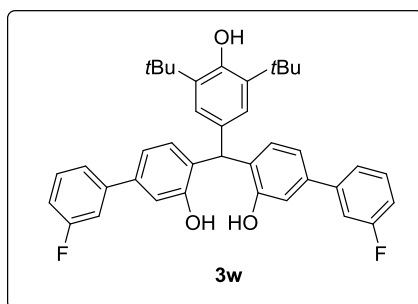

**4,4'-((3,5-di-tert-butyl-4-hydroxyphenyl)methylene)bis(3'-fluoro-[1,1'-biphenyl]-3-ol) (3w):** Prepared according to the general procedure **II** above and obtained as colorless oil (20mg, 34%);  $^1\text{H}$  NMR (500 MHz, DMSO-*d*<sub>6</sub>)  $\delta$  9.50 (s, 2H), 7.49 – 7.45 (m, 2H), 7.45 – 7.36 (m, 4H), 7.15 (t,  $J = 8.0$  Hz, 2H), 7.06 (d,  $J = 8.0$  Hz, 4H), 6.87



(s, 2H), 6.82 (d,  $J = 8.0$  Hz, 2H), 6.77 (s, 1H), 5.98 (s, 1H), 1.31 (s, 18H) ppm;  $^{13}\text{C}$  NMR (125 MHz,  $\text{DMSO-}d_6$ )  $\delta$  163.1 (d,  $J = 243.7$  Hz), 155.6, 152.3, 143.2 (d,  $J = 7.3$  Hz), 139.2, 137.8, 134.2, 131.6, 131.3 (d,  $J = 8.3$  Hz), 130.4, 125.7, 122.9, 117.4, 114.3 (d,  $J = 20.9$  Hz), 113.6, 113.4 (d,  $J = 22.1$  Hz), 42.8, 34.9, 30.9 ppm; IR (KBr,  $\text{cm}^{-1}$ ): 2958, 1611, 1573, 1483, 1433, 1025, 864, 829; HRMS (ESI) calcd for  $\text{C}_{39}\text{H}_{37}\text{F}_2\text{O}_3$   $[\text{M-H}]^-$ : 591.2716, found: 591.2709.

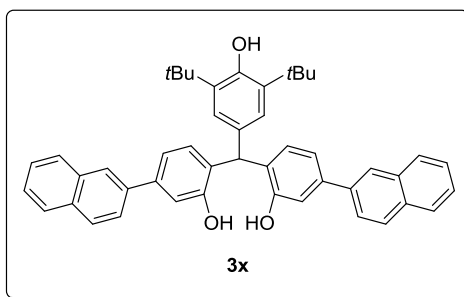

**6,6'-((3,5-di-tert-butyl-4-hydroxyphenyl)methylene)bis(3-(naphthalen-2-yl)phenol) (3x):** Prepared according to the general procedure **II** above and obtained as colorless oil (45mg, 69% yield);  $^1\text{H}$  NMR (500 MHz,  $\text{DMSO-}d_6$ )  $\delta$  9.50 (s, 2H), 8.10 (s, 2H), 7.98 (d,  $J = 8.5$  Hz, 4H), 7.92 (d,  $J = 7.5$  Hz, 2H), 7.76 (d,  $J = 8.5$  Hz, 2H), 7.54 – 7.48 (m, 4H), 7.21 – 7.18 (m, 4H), 6.94 (s, 2H), 6.91 (d,  $J = 8.0$  Hz, 2H), 6.78 (s, 1H), 6.05 (s, 1H), 1.34 (s, 18H) ppm;  $^{13}\text{C}$  NMR (125 MHz,  $\text{DMSO-}d_6$ )  $\delta$  155.6, 152.3, 139.2, 139.1, 138.2, 134.5, 133.8, 132.6, 131.2, 130.5, 128.9, 128.6, 127.9, 126.8, 126.4, 125.8, 125.5, 125.2, 117.7, 113.9, 42.8, 35.0, 31.0 ppm; IR (KBr,  $\text{cm}^{-1}$ ): 3631, 2922, 1600, 1500, 1433, 1415, 1242, 846, 817; HRMS (ESI) calcd for  $\text{C}_{47}\text{H}_{43}\text{O}_3$   $[\text{M-H}]^-$ : 655.3218, found: 655.3204.

#### 4. Control Experiments

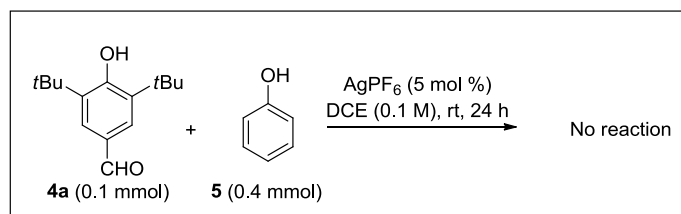

**A) Friedel-Crafts reaction of 3,5-di-*tert*-butyl-4-hydroxy benzaldehyde **4a** with phenol **5**:** To an oven-dried reaction tube was added 3,5-di-*tert*-butyl-4-hydroxy benzaldehyde **4a** (0.1 mmol), phenol **5** (0.4 mmol) and  $\text{AgPF}_6$  (5 mol %), and DCE (1.0 mL) was added. The mixture was stirred for 24 h at room temperature, and no reaction was observed.

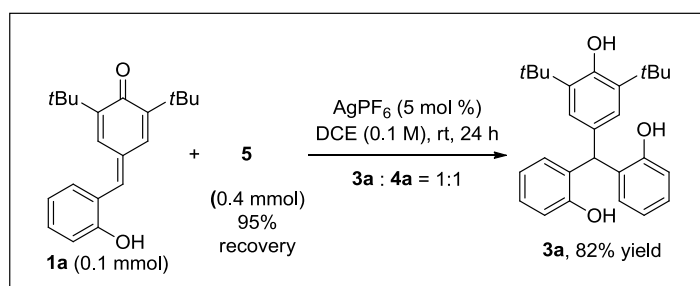

**B) 1,6-Michael addition of *ortho*-hydroxyphenyl-substituted *para*-quinone methide **1a** with phenol **5**:** To an oven-dried reaction tube was added *ortho*-hydroxyphenyl-substituted *para*-quinone methide **1a** (0.1 mmol), phenol **5** (0.4 mmol) and  $\text{AgPF}_6$  (5 mol %), and DCE (1.0 mL) was added. The mixture was stirred for 24 h at room temperature. Purification of mixture by column chromatography on silica gel (PE/EA = 5:1 as eluent) gave the desired product **3a** (33.1 mg, 82% yield) and the recovered phenol **5** (34.6 mg, 95% yield).

**Two observations can exclude the possibility of Michael addition reaction with simple phenol **5****

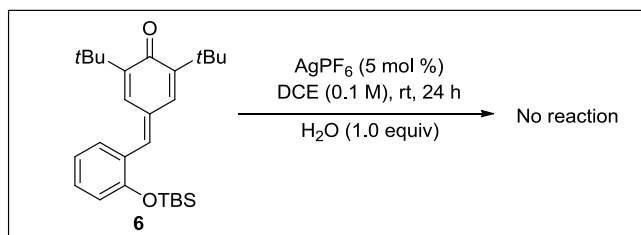

**C) AgPF<sub>6</sub> catalyzed O-TBS protected *ortho*-hydroxyphenyl-substituted *para*-quinone methide **6**:** To an oven-dried reaction tube was added **6** (0.1 mmol) and AgPF<sub>6</sub> (5 mol %), and DCE (1.0 mL) was added, Then H<sub>2</sub>O (0.1 mmol) was added by dropwise slowly. The mixture was stirred for 24 h at room temperature. No reaction was observed.

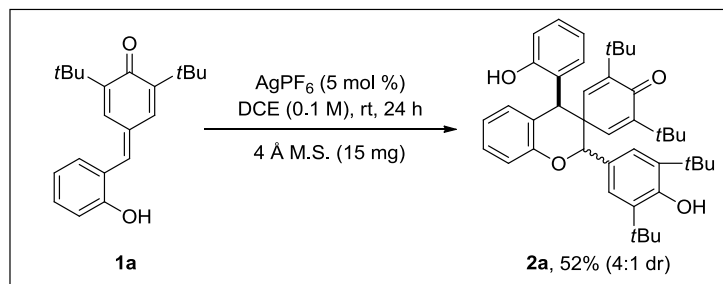

**D) Synthesis of intermediate 2a:** To an oven-dried reaction tube was added *p*-QMs **1a** (0.1 mmol, 1.0 equiv), AgPF<sub>6</sub> (5 mol %), 4 Å M.S. (15 mg) and DCE (1.0 mL). The reaction mixture was then stirred for 24 h at room temperature. Purification of mixture by column chromatography on silica gel (PE/EA = 5:1 as eluent) gave the desired product **2a** (32.0 mg, 52% yield, and 4:1 dr), melting point: 220-222 °C; <sup>1</sup>H NMR (500 MHz, DMSO-*d*<sub>6</sub>) δ 9.70 (s, 0.3H), 9.52 (s, 1H), 7.23-7.18 (m, 1.42H), 7.07 (s, 2H), 7.05-6.97 (m, 3H), 6.93-6.80 (m, 7H), 6.75-6.69 (m, 3.2H), 6.60-6.57 (t, *J* = 5 Hz, 0.5H), 6.52-6.45 (m, 2.2H), 5.83 (s, 0.3H), 5.70 (s, 1H), 5.40 (s, 1H), 4.95 (s, 0.3H), 1.34 (s, 23H), 0.98-0.97 (m, 11.6H), 0.92-0.91 (m, 11.8H) ppm; <sup>13</sup>C NMR (125 MHz, DMSO-*d*<sub>6</sub>) δ 185.0, 184.9, 156.1, 154.9, 154.8, 153.9, 153.3, 152.5, 148.9, 148.7, 146.1, 145.0, 142.7, 137.6, 137.5, 136.3, 130.7, 130.1, 129.5, 128.7, 128.2, 127.8, 127.6 (d, *J* = 6.3 Hz), 123.9, 123.7, 123.5, 123.1, 122.6, 120.8, 117.2, 116.4, 116.3, 114.3, 114.2, 83.7, 77.5, 59.7, 47.2, 46.7, 44.3, 34.4, 34.1, 30.2, 28.6, 28.5 ppm; IR (KBr, cm<sup>-1</sup>): 3638, 2957, 1618, 1582, 1545, 1231, 803, 754; HRMS (ESI) calcd for C<sub>42</sub>H<sub>52</sub>O<sub>4</sub>Na<sup>+</sup> [M+Na]<sup>+</sup>: 643.3758, found: 643.3775.

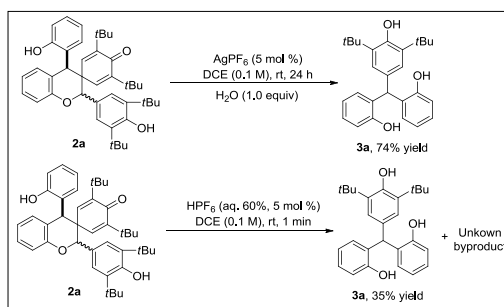

**E) Transformation of intermediate 2a:** 1) To an oven-dried reaction tube was added **2a** (0.1 mmol, 1.0 equiv), AgPF<sub>6</sub> (5 mol %), H<sub>2</sub>O (0.1 mmol, 1.0 equiv) and DCE (1.0 mL). The reaction mixture was then stirred for 24 h at room temperature. Purification of mixture by column chromatography on silica gel (PE/EA = 5:1 as eluent) gave the desired product **3a** (29.9 mg, 74% yield); 2) To an oven-dried reaction tube was added **2a** (0.1 mmol, 1.0 equiv), HPF<sub>6</sub> (aq. 60%, 5 mol %), and DCE (1.0 mL). The reaction mixture was then stirred for 1 min at room temperature. Purification of mixture by column chromatography on silica gel (PE/EA = 5:1 as eluent) gave the desired product **3a** (14.1 mg, 35% yield).

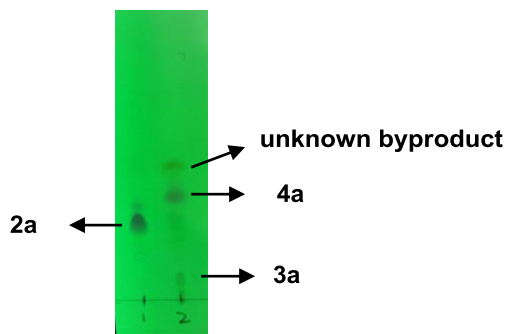

Figure S1 TLC detection in the transformation of intermediate **2a** for 1 min: 1) reaction **E1**; 2) reaction **E2**.

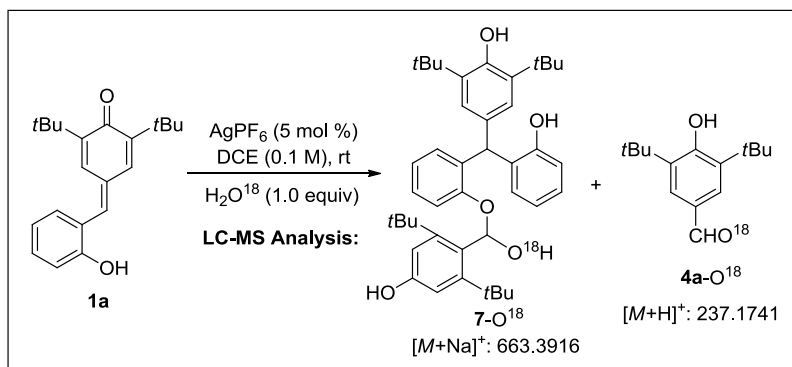

### F) The LC-HRMS spectra of the reaction in the presence of $\text{H}_2\text{O}^{18}$ .

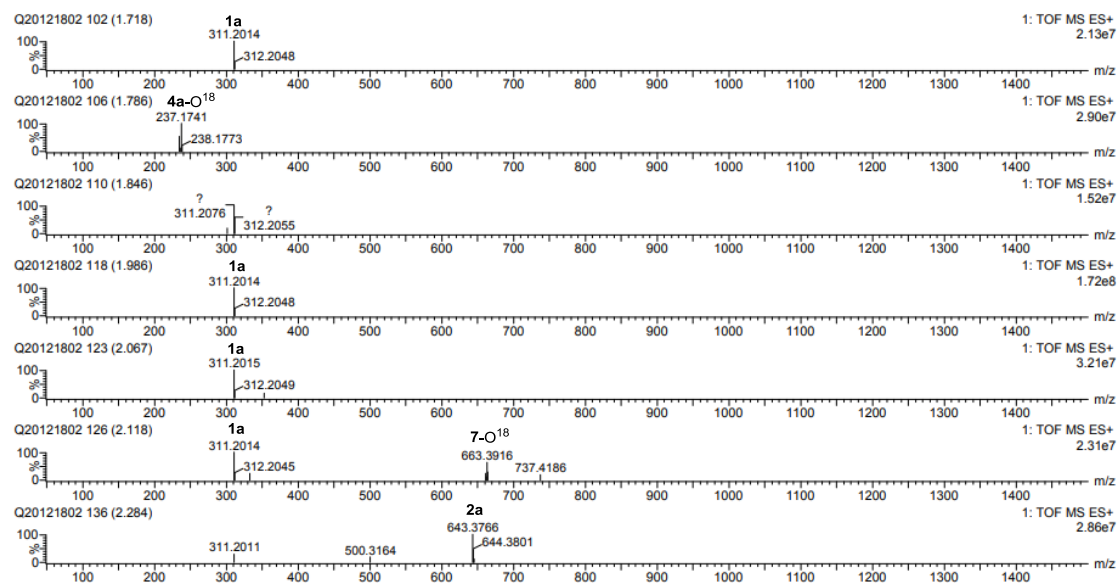

## 4. X-ray crystal Data

### A) X-Ray Structure of product 3a (CCDC 2039963)

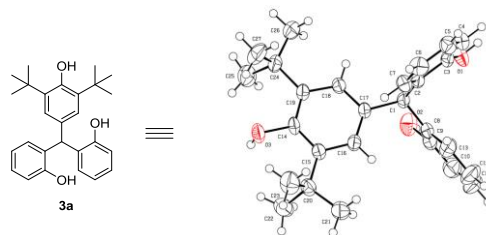

Figure S2 X-Ray Structure of 3a

Table S1 Crystal data and structure refinement for 3a

|                                  |                                                                                                                            |
|----------------------------------|----------------------------------------------------------------------------------------------------------------------------|
| Empirical formula                | C <sub>13.50</sub> H <sub>16</sub> O <sub>1.50</sub>                                                                       |
| Formula weight                   | 202.26                                                                                                                     |
| Temperature                      | 298(2) K                                                                                                                   |
| Wavelength                       | 0.71073 Å                                                                                                                  |
| Crystal system                   | Triclinic                                                                                                                  |
| Space group                      | P -1                                                                                                                       |
| Unit cell dimensions             | a = 10.835(17) Å      a = 84.933(17) °<br>b = 10.925(17) Å      b = 64.499(17) °<br>c = 10.995(17) Å      γ = 79.764(19) ° |
| Volume                           | 1156(3) Å <sup>3</sup>                                                                                                     |
| Z                                | 4                                                                                                                          |
| Density (calculated)             | 1.162 Mg/m <sup>3</sup>                                                                                                    |
| Absorption coefficient           | 0.074 mm <sup>-1</sup>                                                                                                     |
| F(000)                           | 436                                                                                                                        |
| Crystal size                     | 0.43 x 0.40 x 0.38 mm <sup>3</sup>                                                                                         |
| Theta range for data collection  | 2.052 to 25.015 °                                                                                                          |
| Index ranges                     | -7 ≤ h ≤ 12, -12 ≤ k ≤ 12, -12 ≤ l ≤ 13                                                                                    |
| Reflections collected            | 5822                                                                                                                       |
| Independent reflections          | 4006 [R(int) = 0.0382]                                                                                                     |
| Completeness to theta = 25.015 ° | 98.6 %                                                                                                                     |
| Absorption correction            | Semi-empirical from equivalents                                                                                            |
| Max. and min. transmission       | 0.9724 and 0.9689                                                                                                          |

|                                   |                                             |
|-----------------------------------|---------------------------------------------|
| Refinement method                 | Full-matrix least-squares on F <sup>2</sup> |
| Data / restraints / parameters    | 4006 / 0 / 278                              |
| Goodness-of-fit on F <sup>2</sup> | 1.056                                       |
| Final R indices [I>2sigma(I)]     | R1 = 0.0579, wR2 = 0.1433                   |
| R indices (all data)              | R1 = 0.0867, wR2 = 0.1576                   |
| Extinction coefficient            | 0.046(5)                                    |
| Largest diff. peak and hole       | 0.248 and -0.239 e.Å <sup>-3</sup>          |



## B) X-Ray Structure of intermediate 2a (CCDC 2085323)

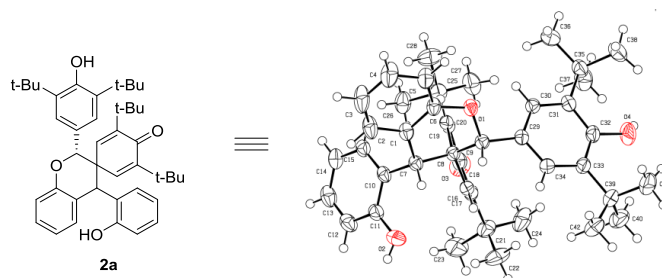

Figure S3 X-Ray Structure of 2a

Table S2 Crystal data and structure refinement for 2a

|                                        |                                                |
|----------------------------------------|------------------------------------------------|
| Empirical formula                      | C <sub>42</sub> H <sub>52</sub> O <sub>4</sub> |
| Formula weight                         | 620.83                                         |
| Temperature/K                          | 170.00(10)                                     |
| Crystal system                         | monoclinic                                     |
| Space group                            | P2 <sub>1</sub> /n                             |
| a/Å                                    | 12.5033(6)                                     |
| b/Å                                    | 31.9324(10)                                    |
| c/Å                                    | 12.5127(5)                                     |
| $\alpha$ /°                            | 90                                             |
| $\beta$ /°                             | 108.215(4)                                     |
| $\gamma$ /°                            | 90                                             |
| Volume/Å <sup>3</sup>                  | 4745.5(3)                                      |
| Z                                      | 4                                              |
| $\rho_{\text{calc}}/\text{cm}^3$       | 0.869                                          |
| $\mu/\text{mm}^{-1}$                   | 0.054                                          |
| F(000)                                 | 1344.0                                         |
| Crystal size/mm <sup>3</sup>           | 0.28 × 0.23 × 0.17                             |
| Radiation                              | Mo K $\alpha$ ( $\lambda$ = 0.71073)           |
| 2 $\theta$ range for data collection/° | 3.656 to 62.162                                |
| Index ranges                           | -16 ≤ h ≤ 17, -45 ≤ k ≤ 45, -13 ≤ l ≤ 17       |

|                                                |                                                                   |
|------------------------------------------------|-------------------------------------------------------------------|
| Reflections collected                          | 43438                                                             |
| Independent reflections                        | 12726 [ $R_{\text{int}} = 0.0311$ , $R_{\text{sigma}} = 0.0414$ ] |
| Data/restraints/parameters                     | 12726/1/427                                                       |
| Goodness-of-fit on $F^2$                       | 1.091                                                             |
| Final R indexes [ $I \geq 2\sigma(I)$ ]        | $R_1 = 0.0473$ , $wR_2 = 0.1247$                                  |
| Final R indexes [all data]                     | $R_1 = 0.0733$ , $wR_2 = 0.1334$                                  |
| Largest diff. peak/hole / $e \text{ \AA}^{-3}$ | 0.21/-0.29                                                        |

## 5. NMR Spectrum

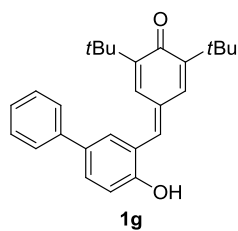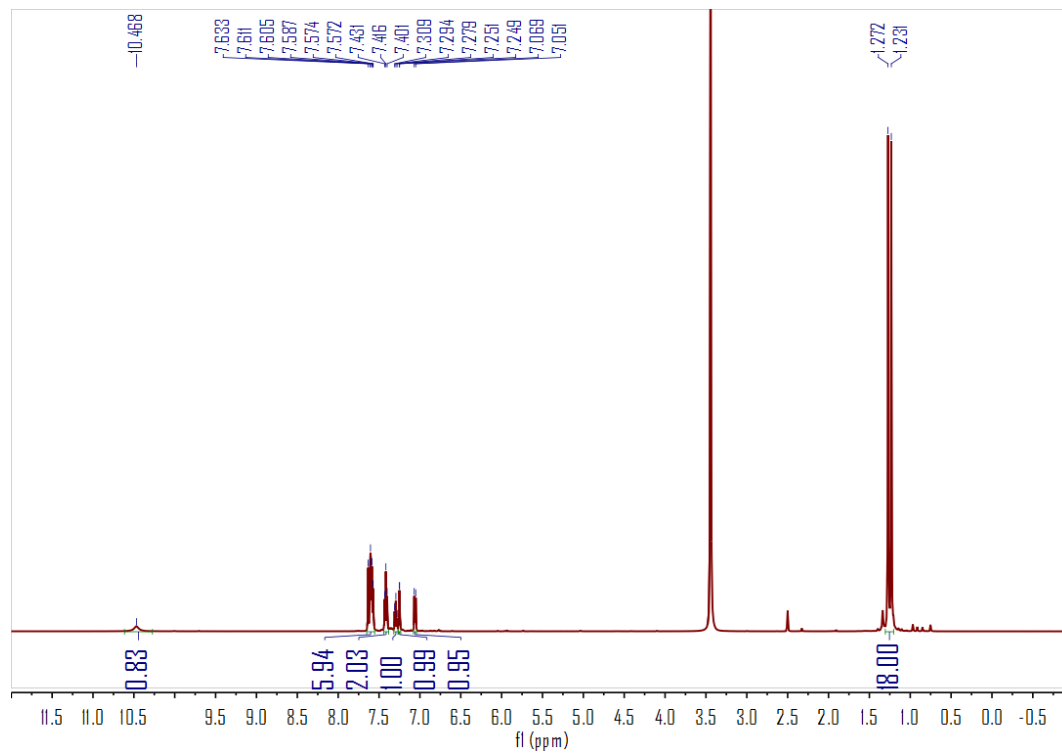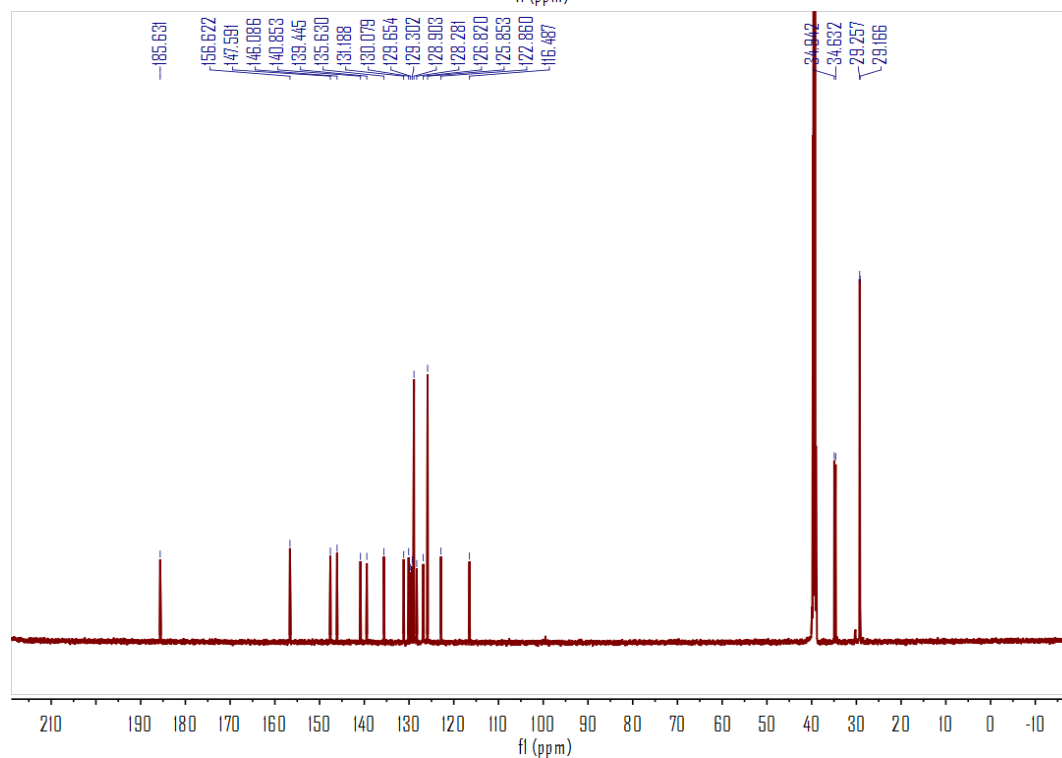

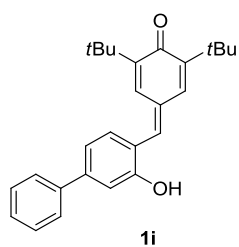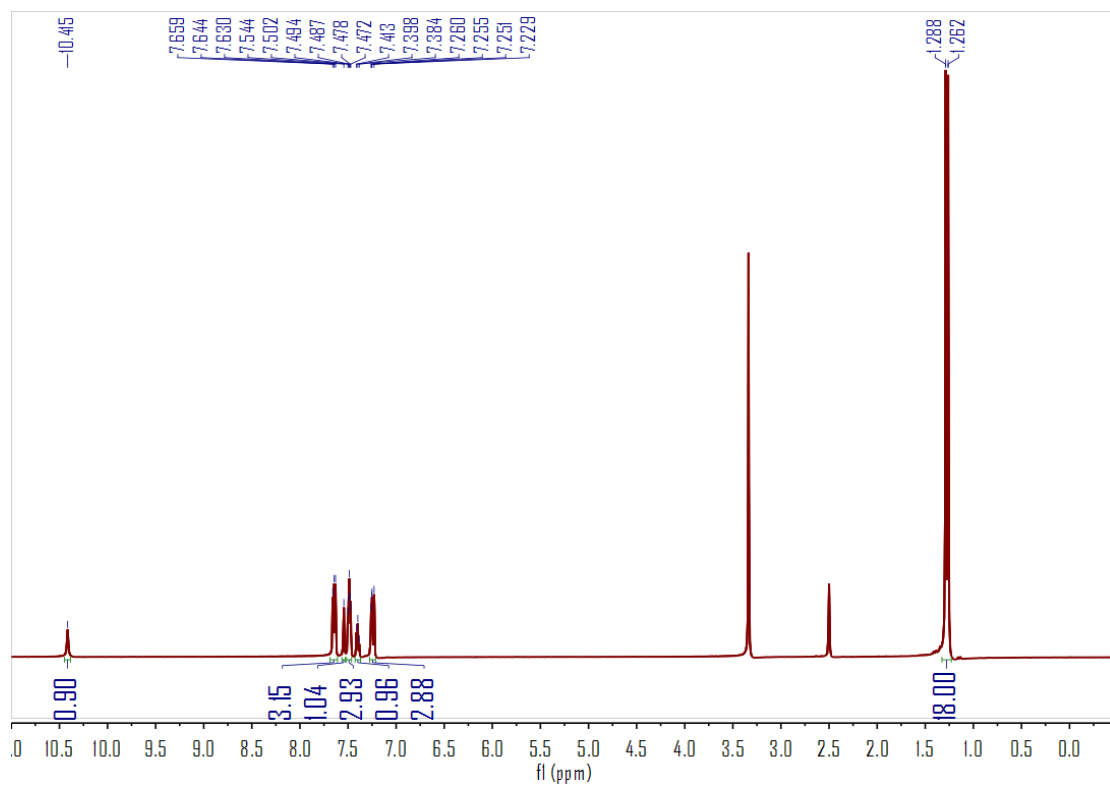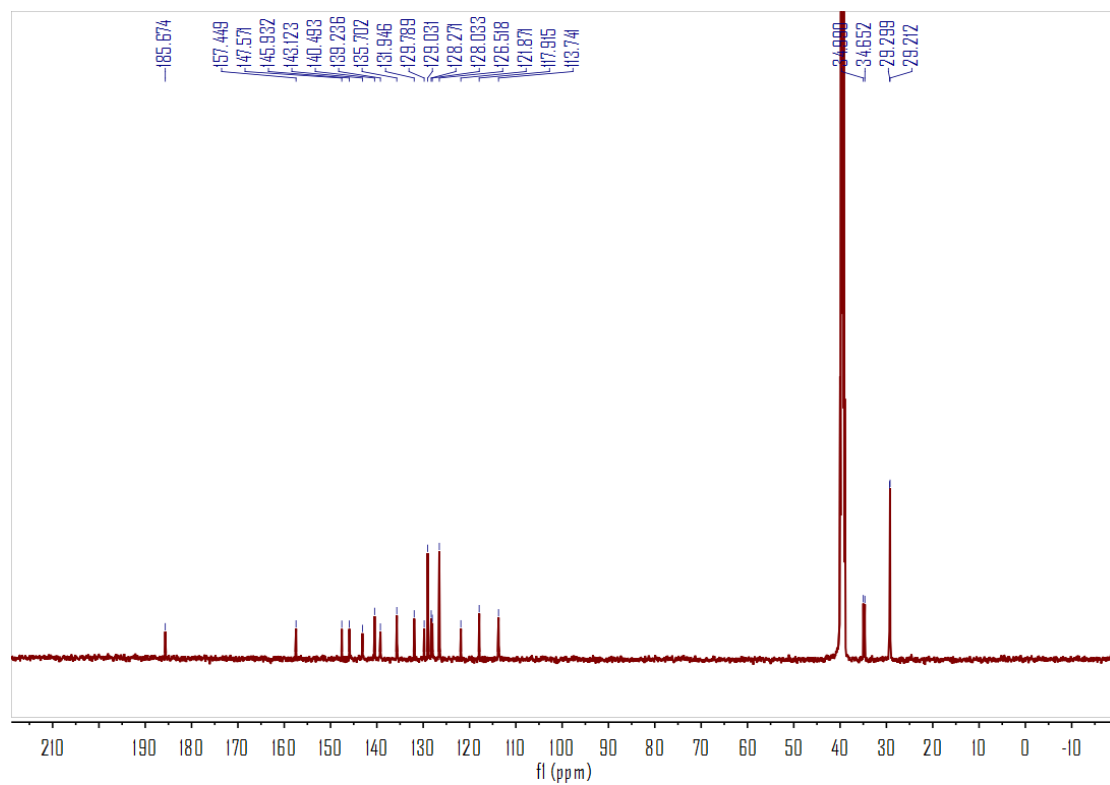

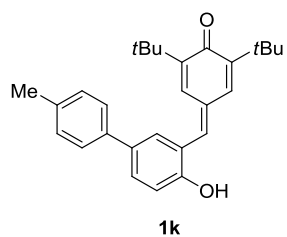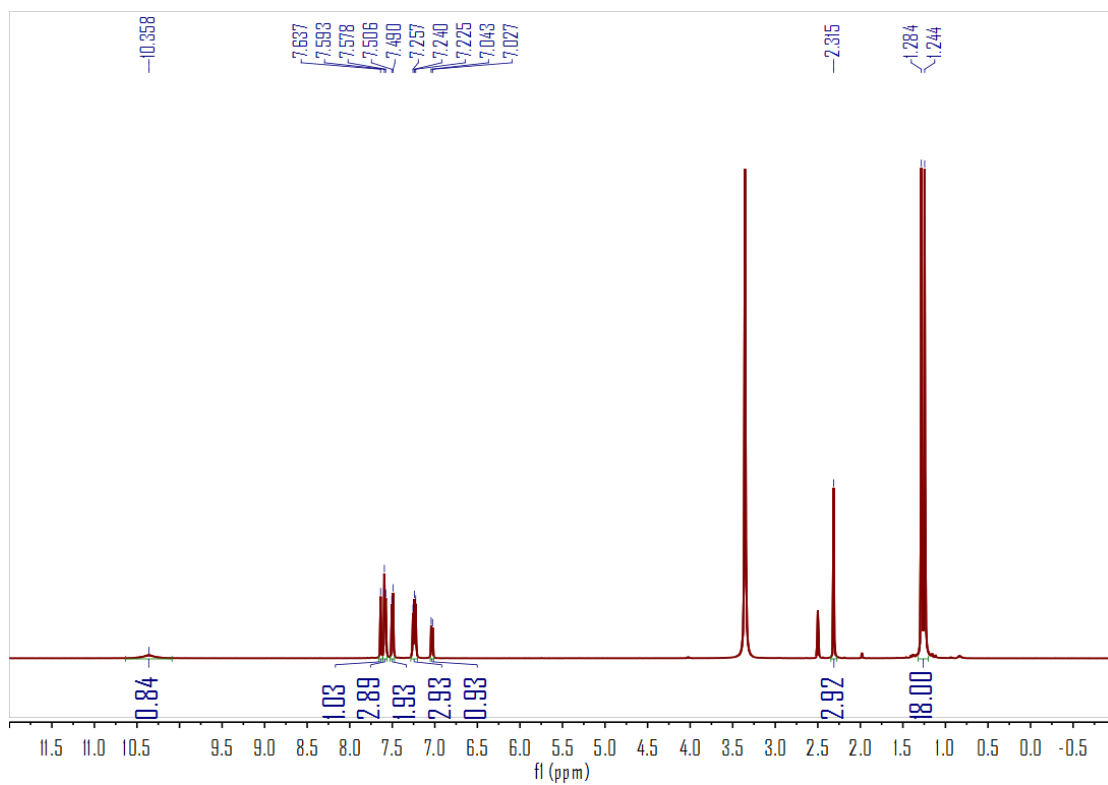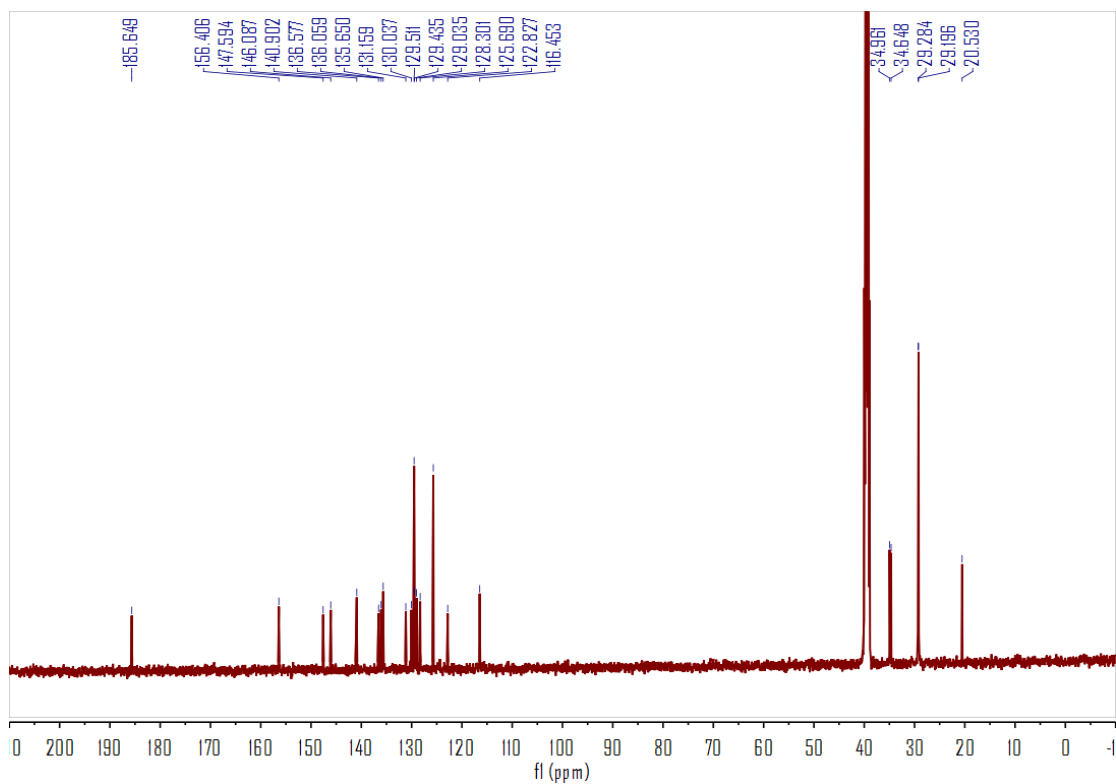

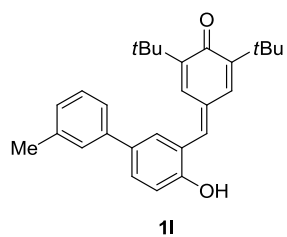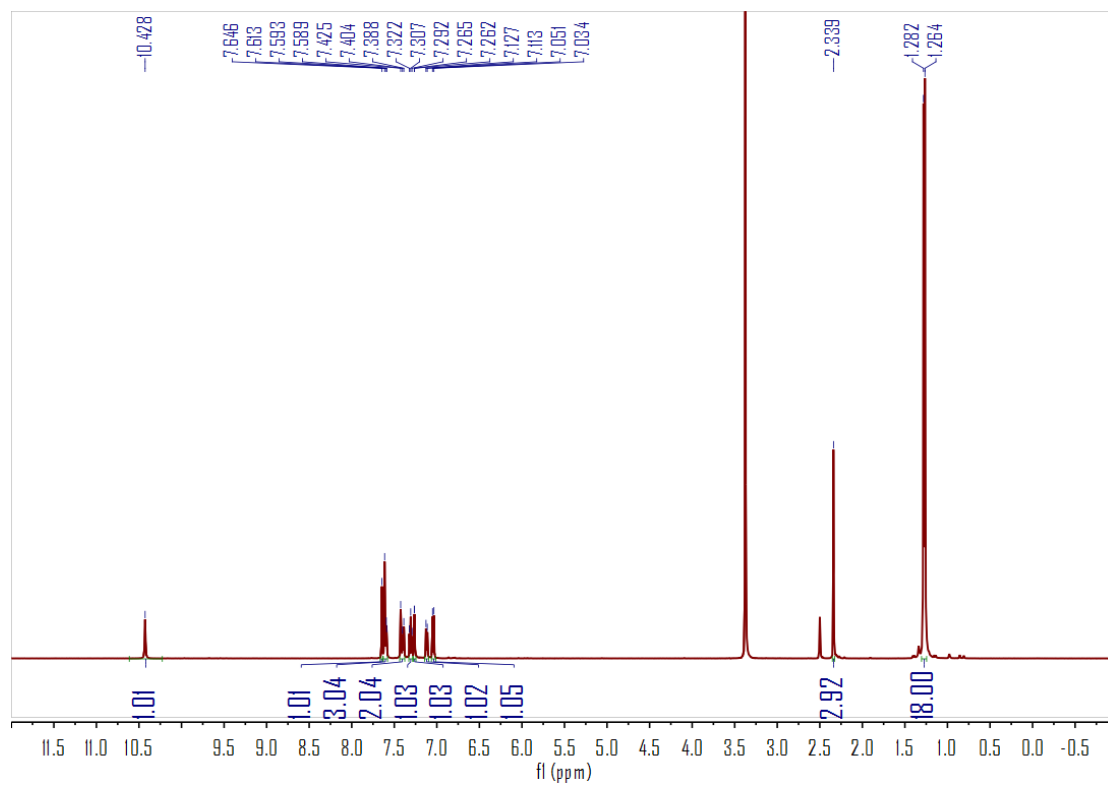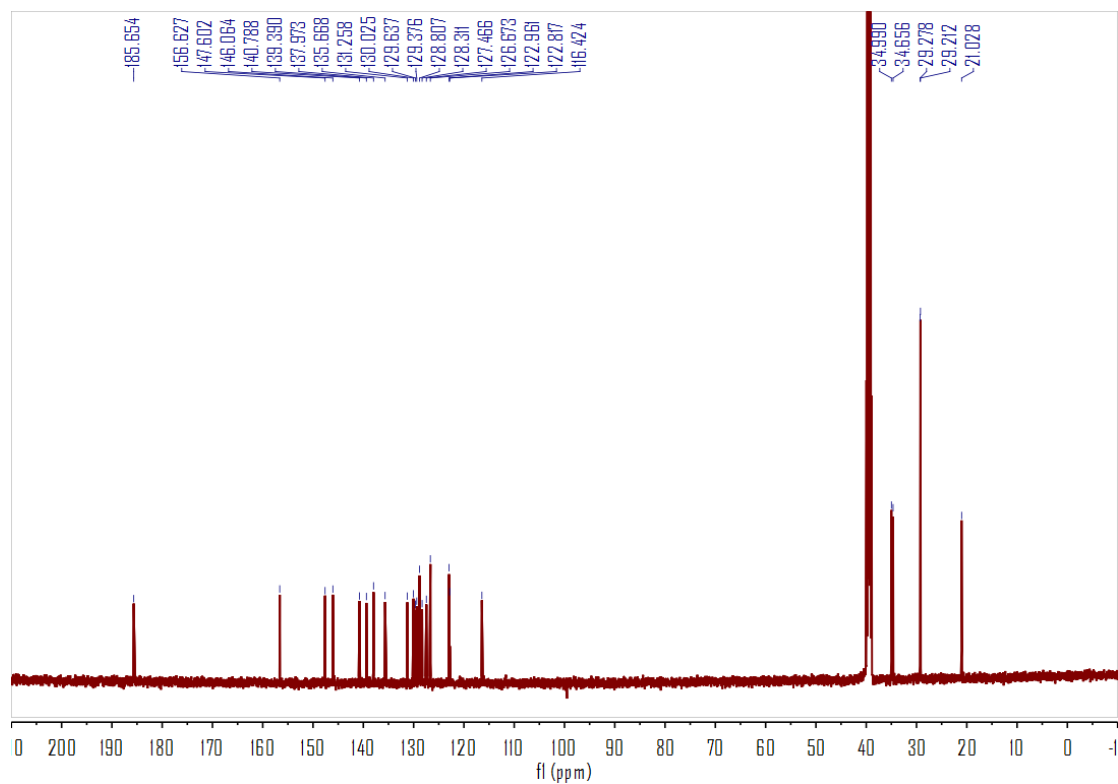

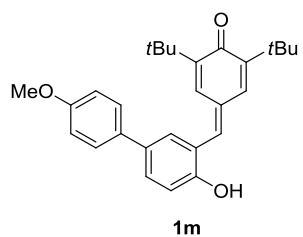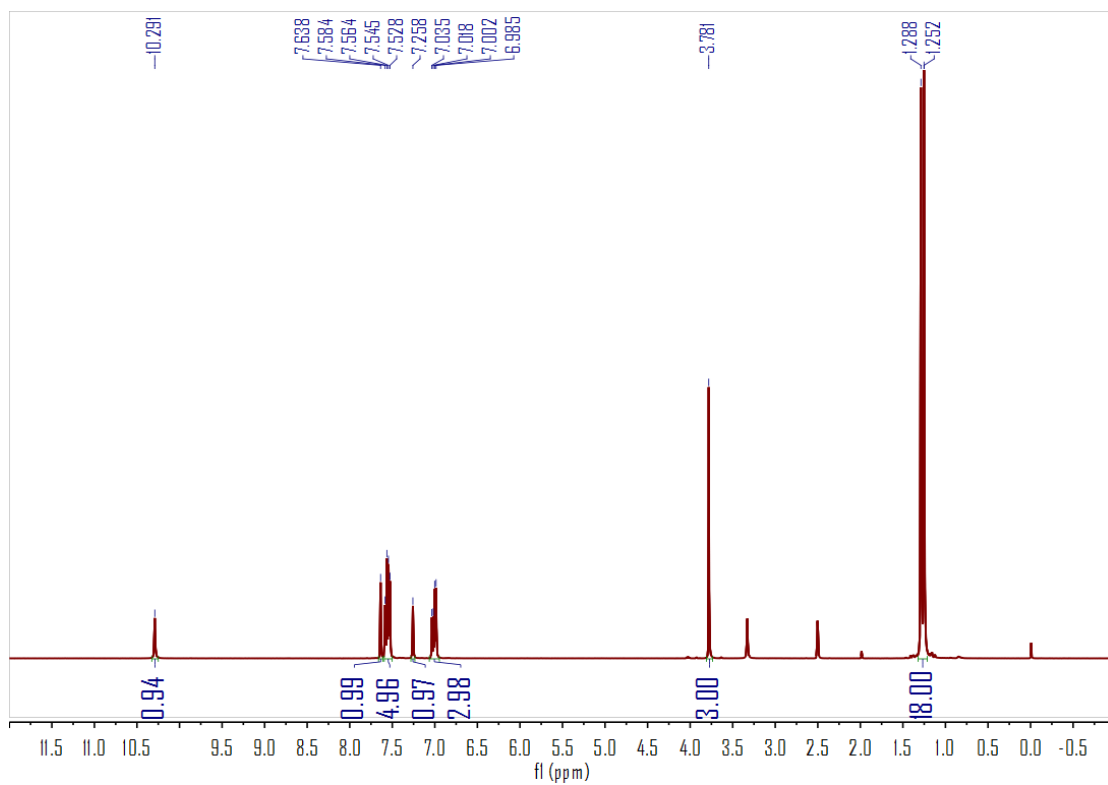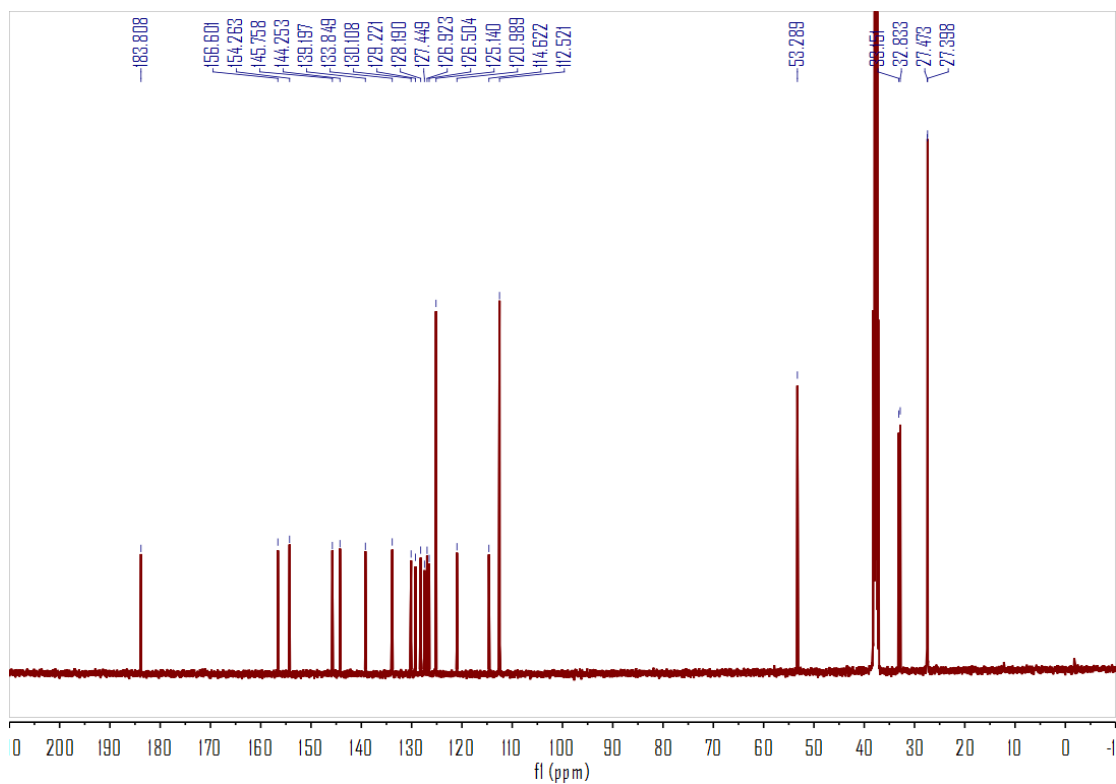

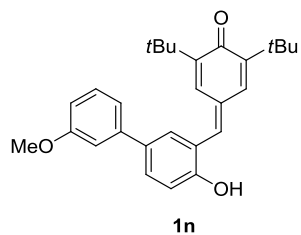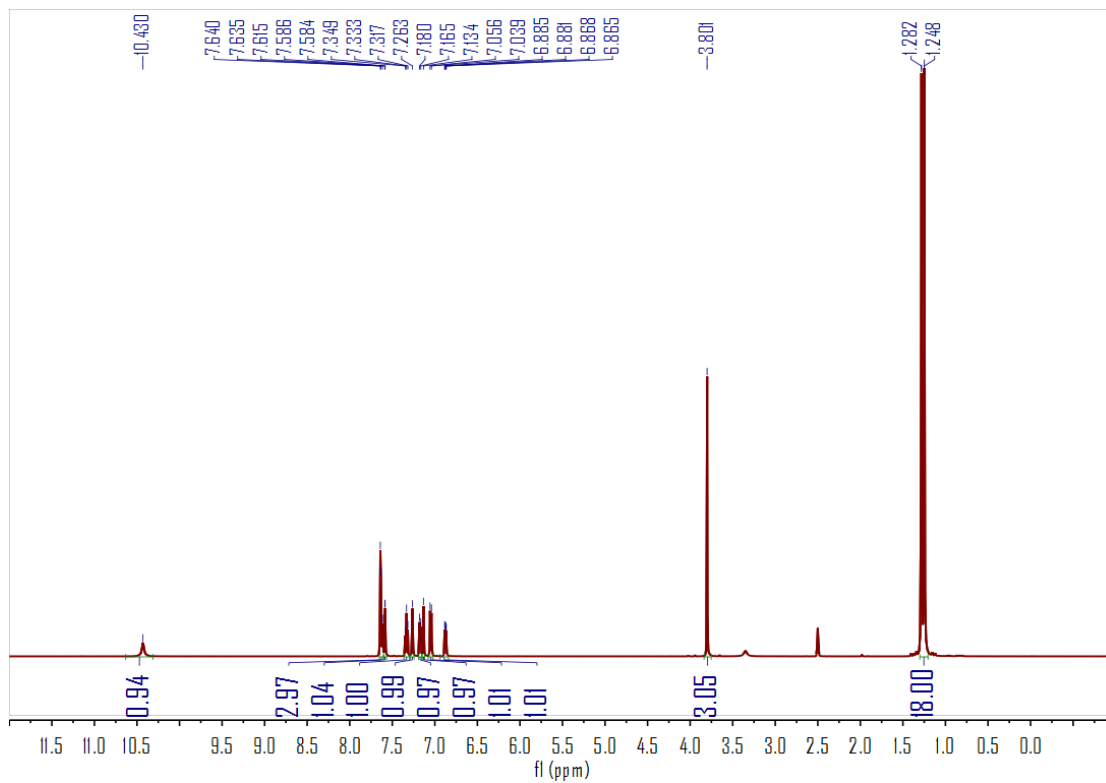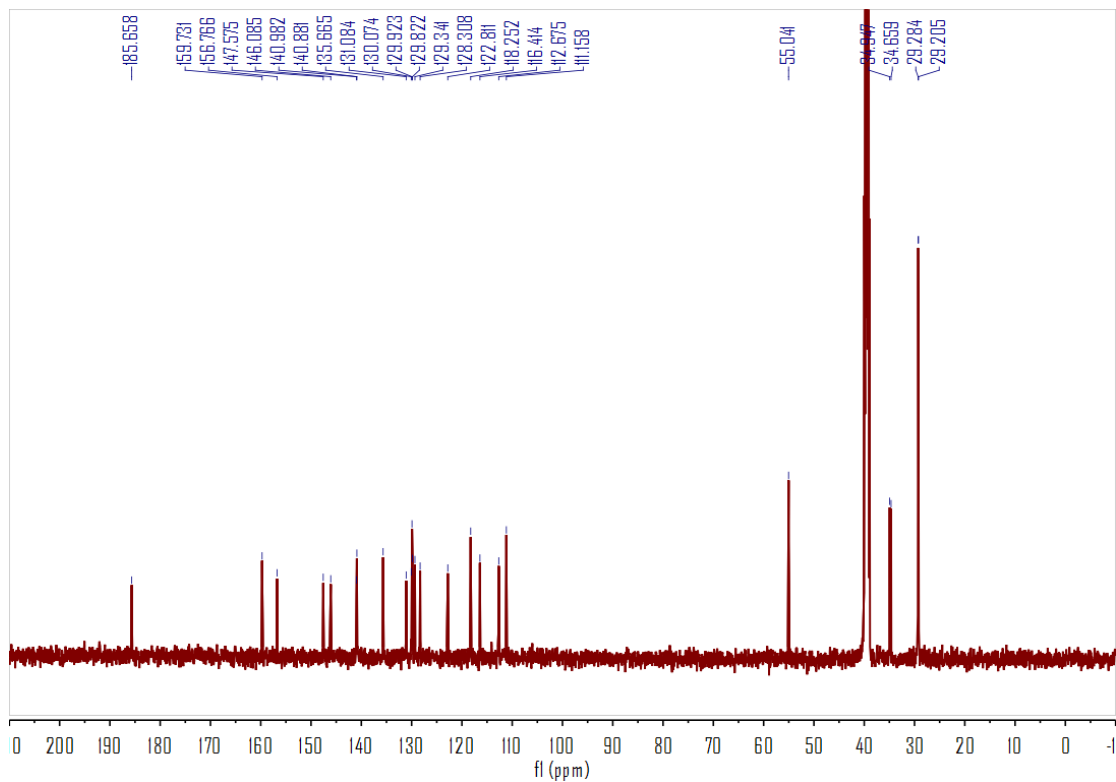



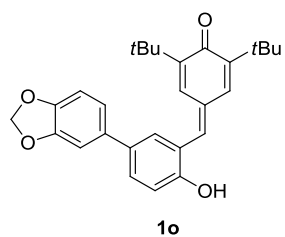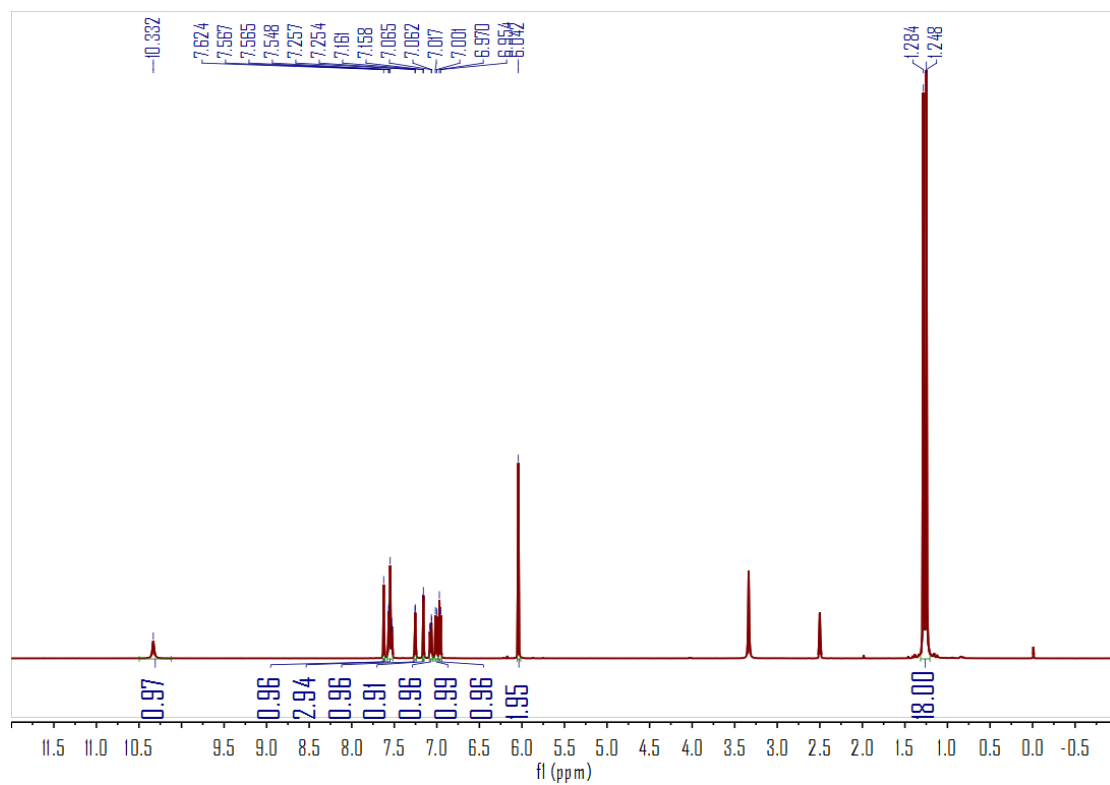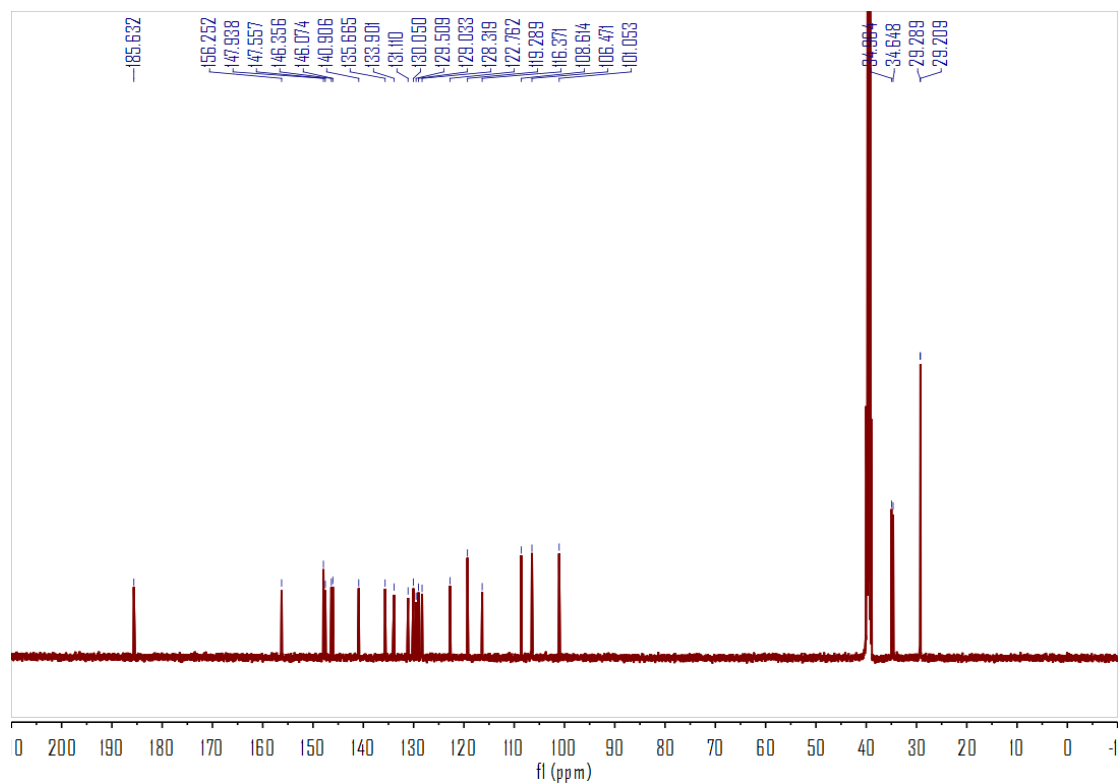

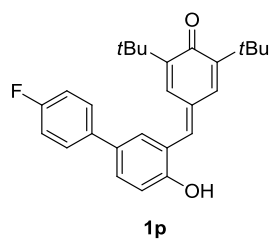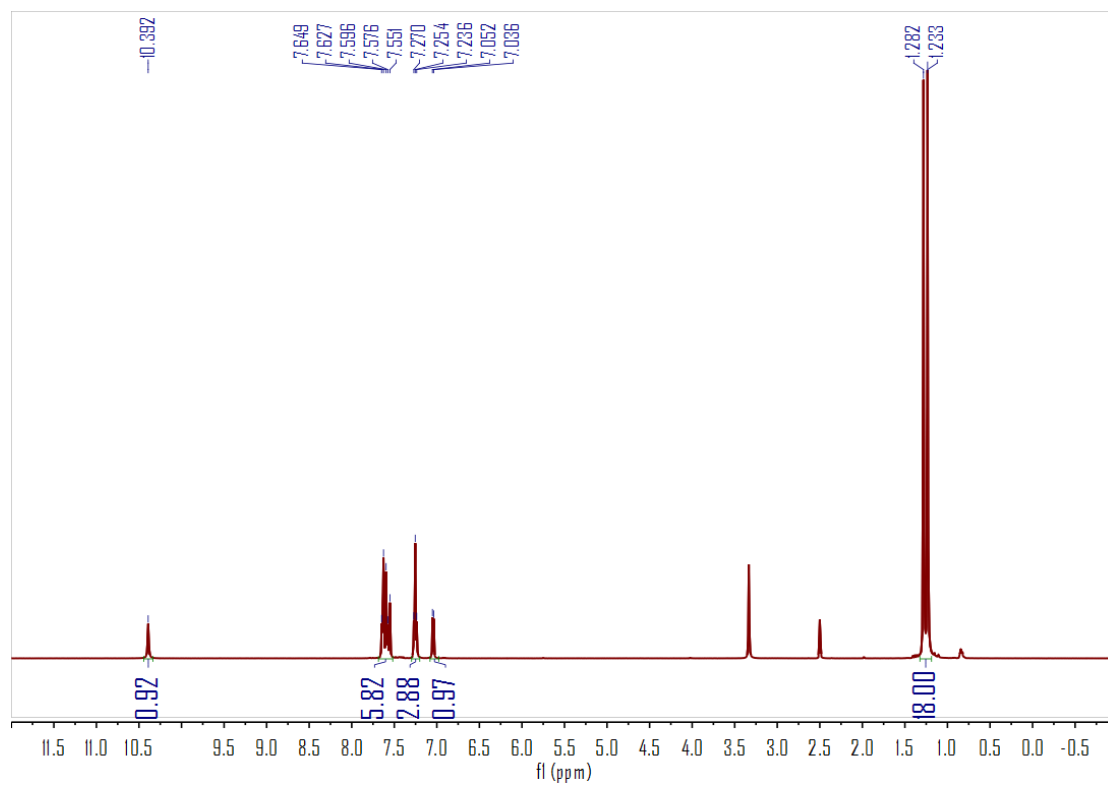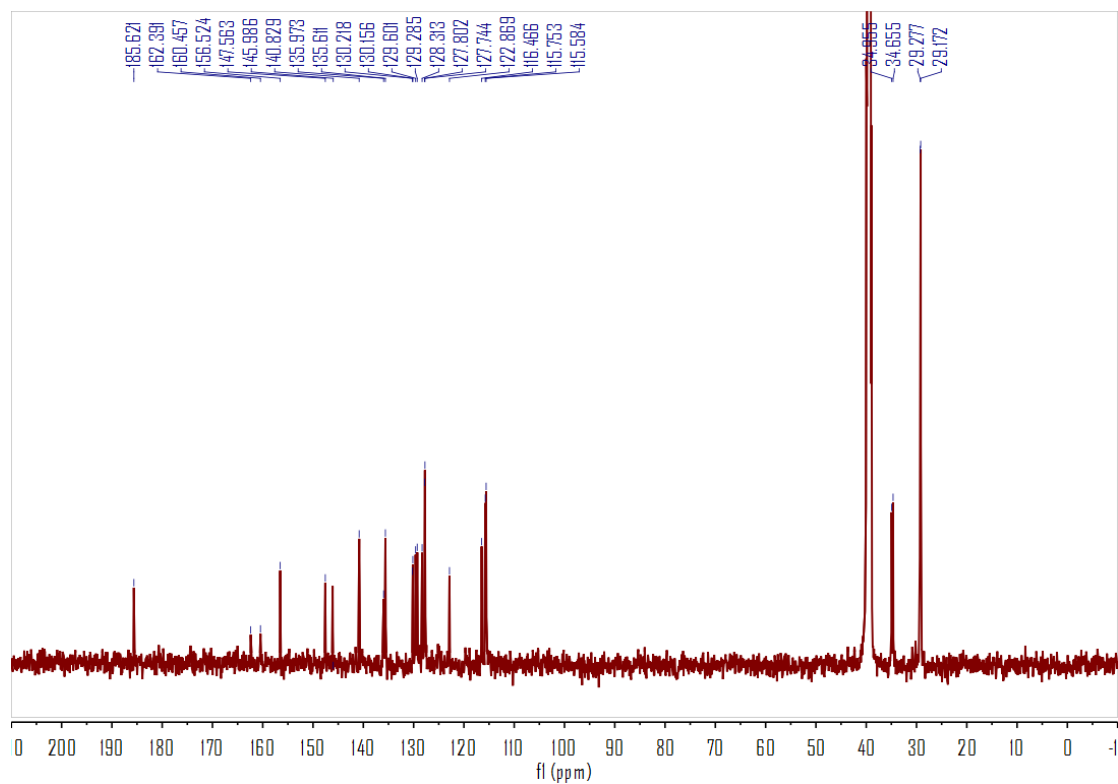

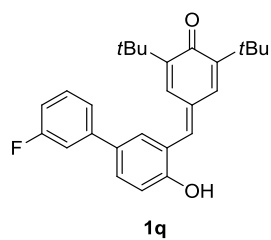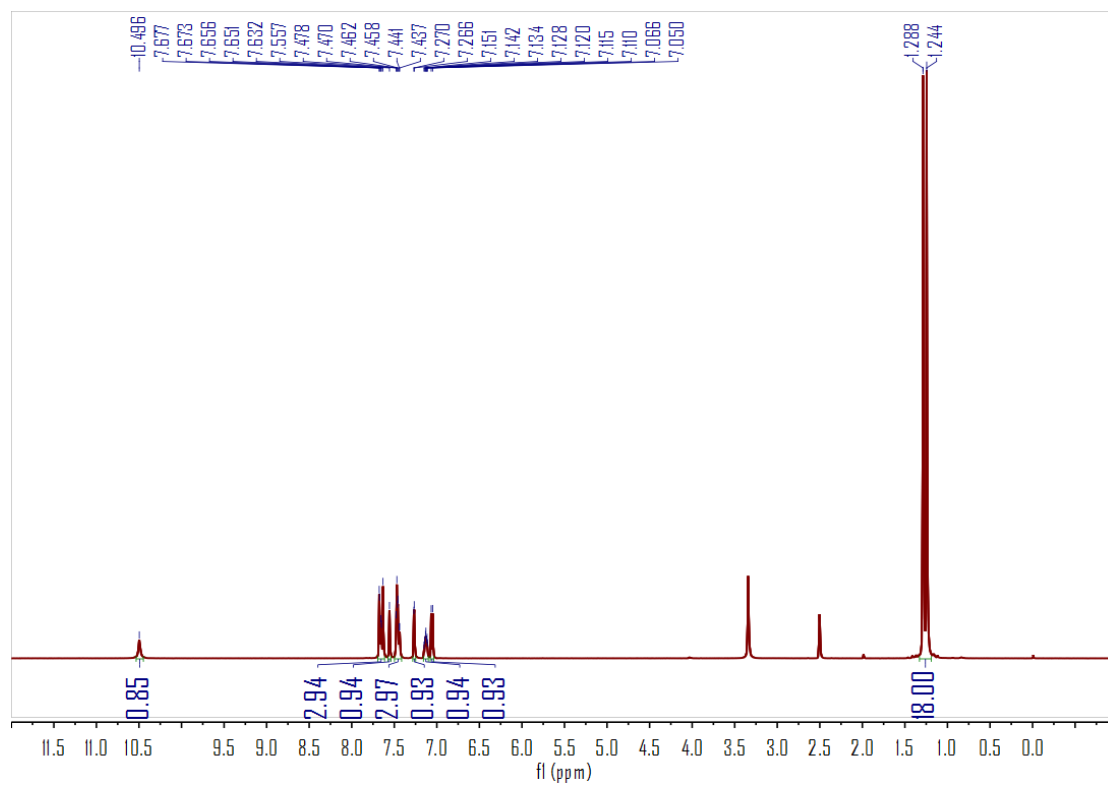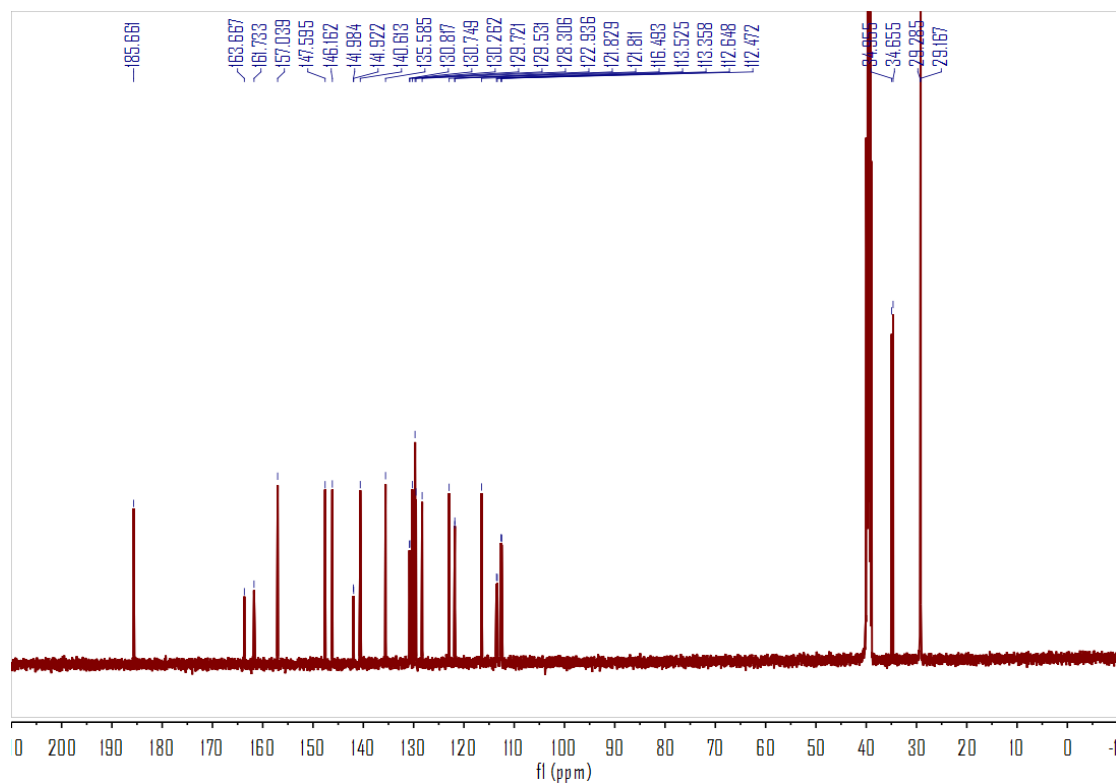

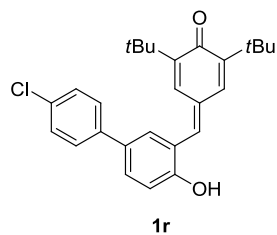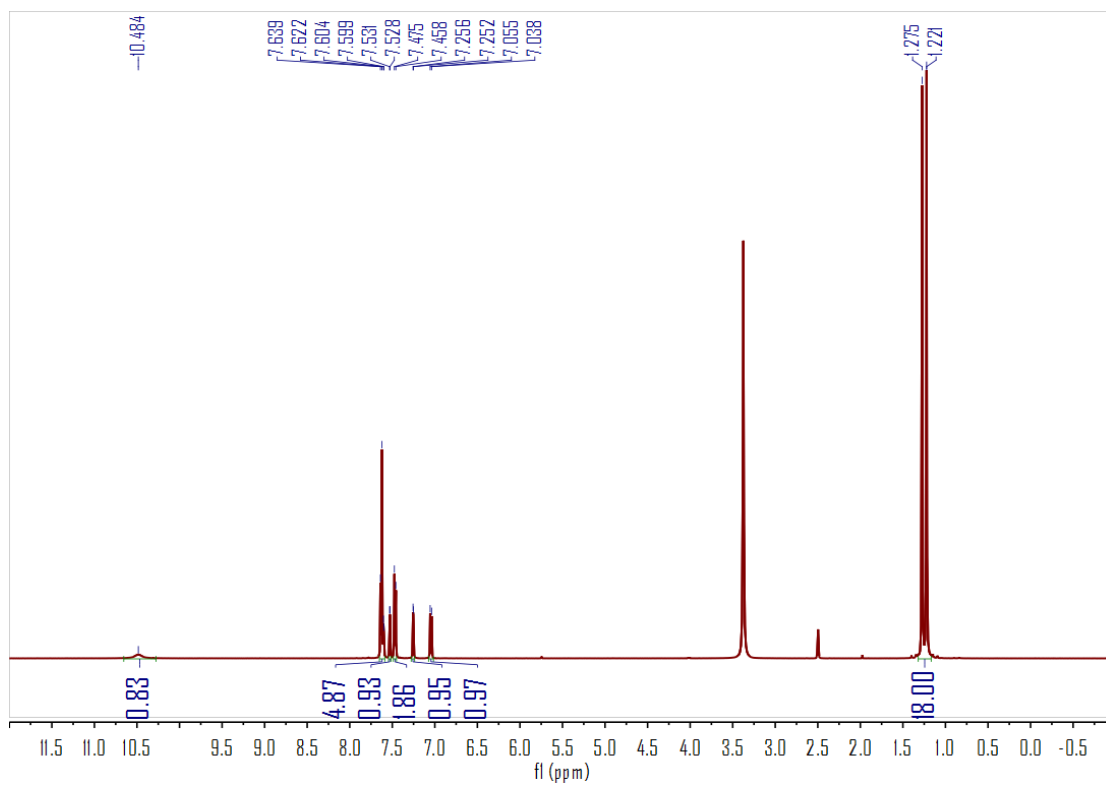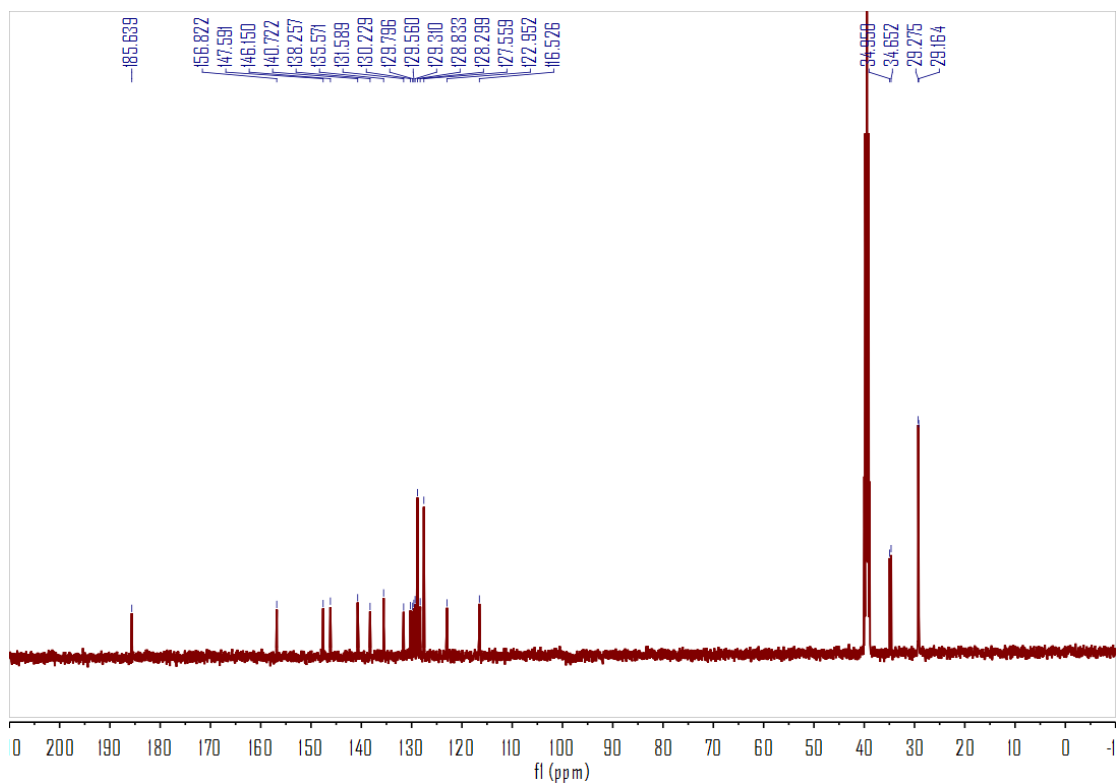

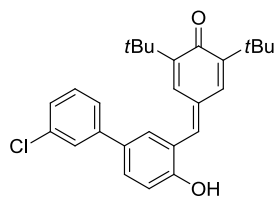

1s

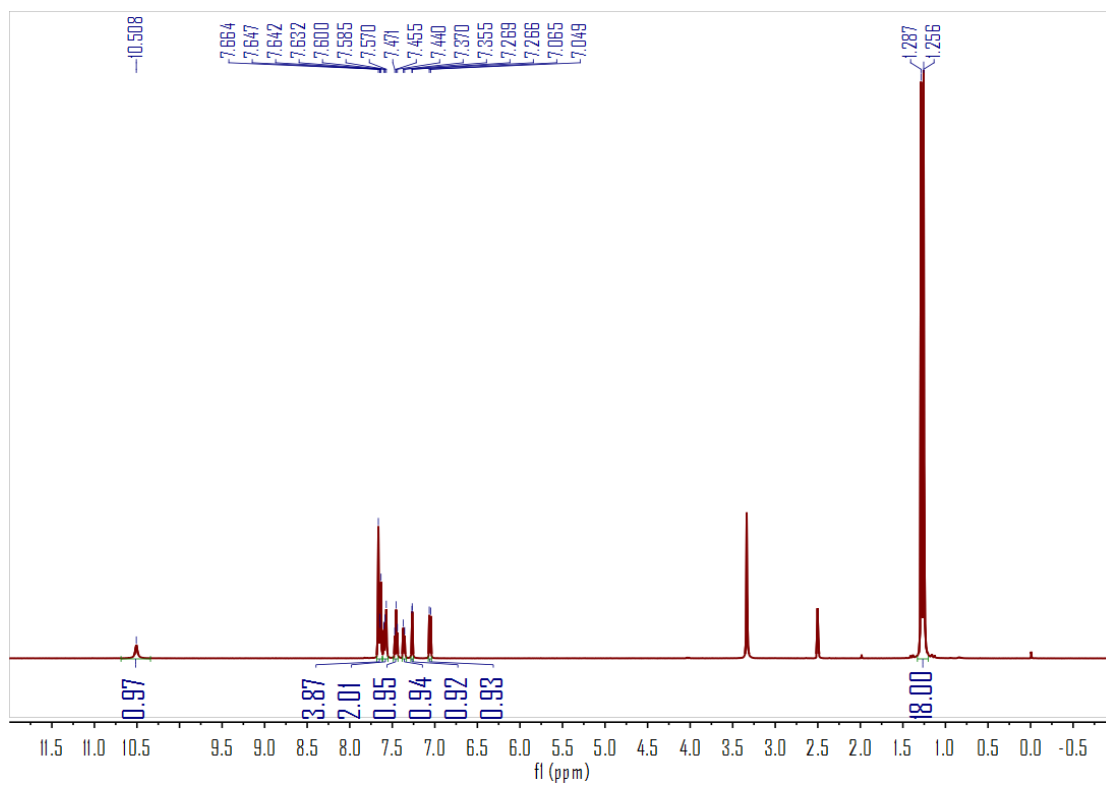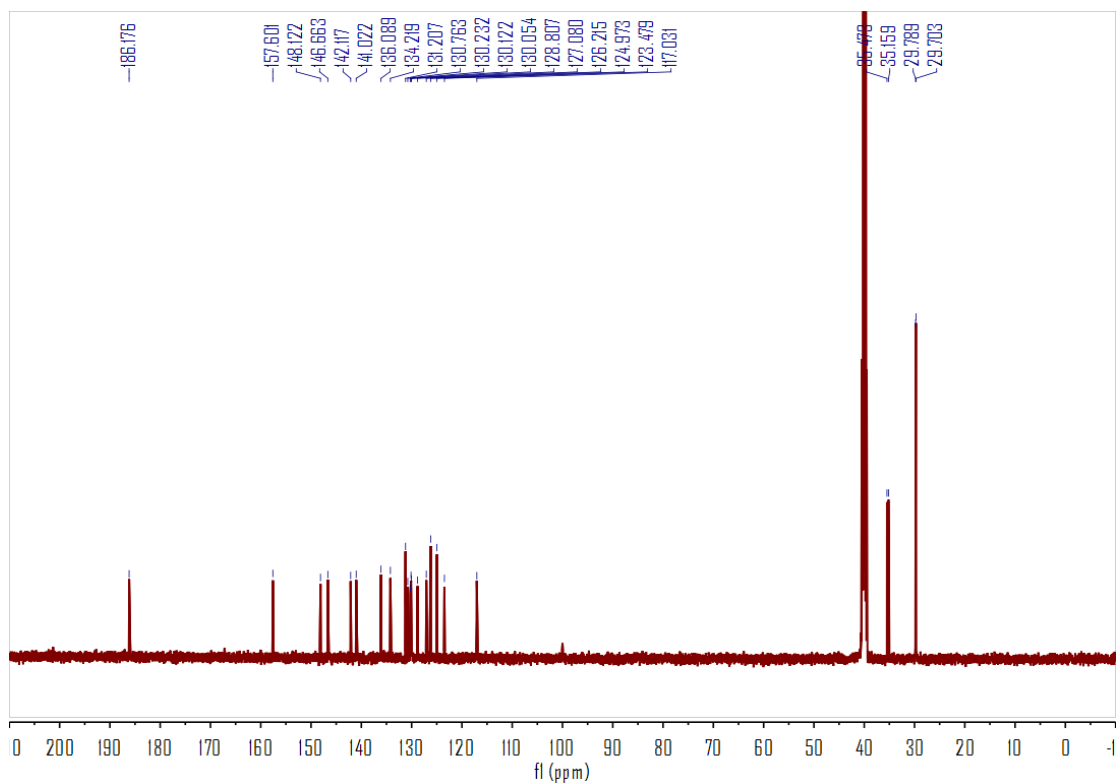

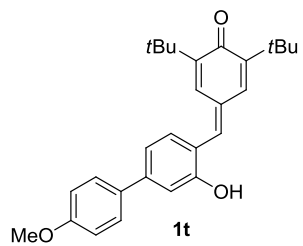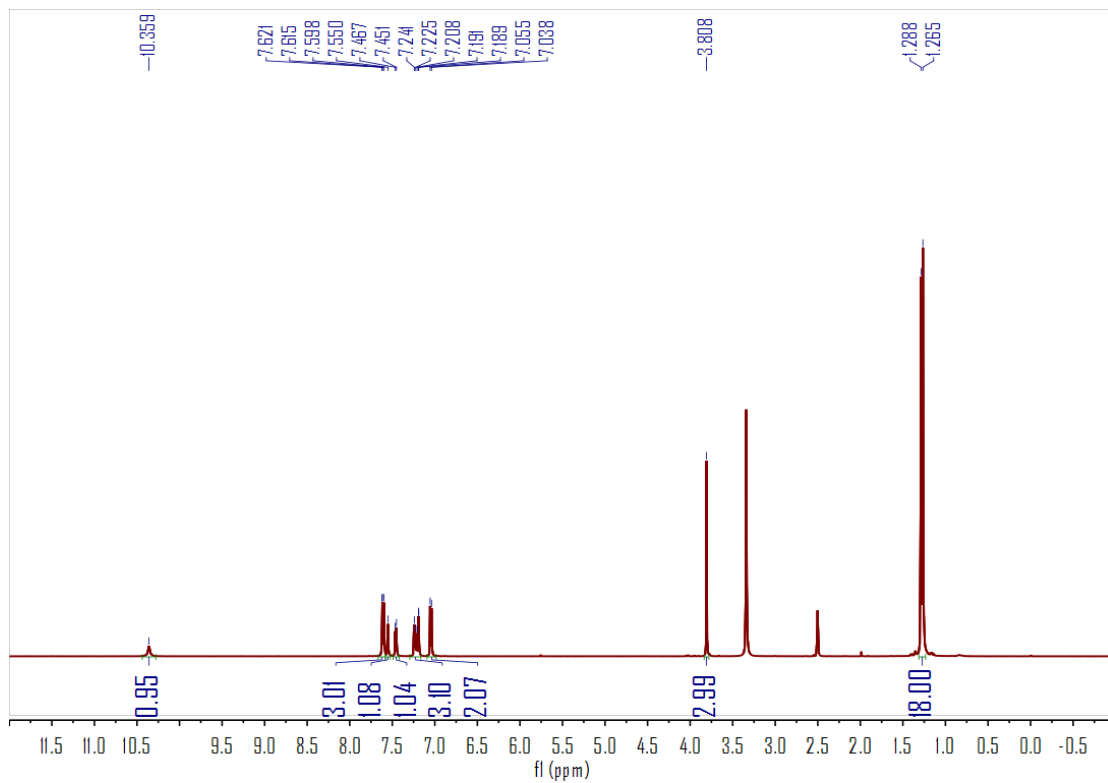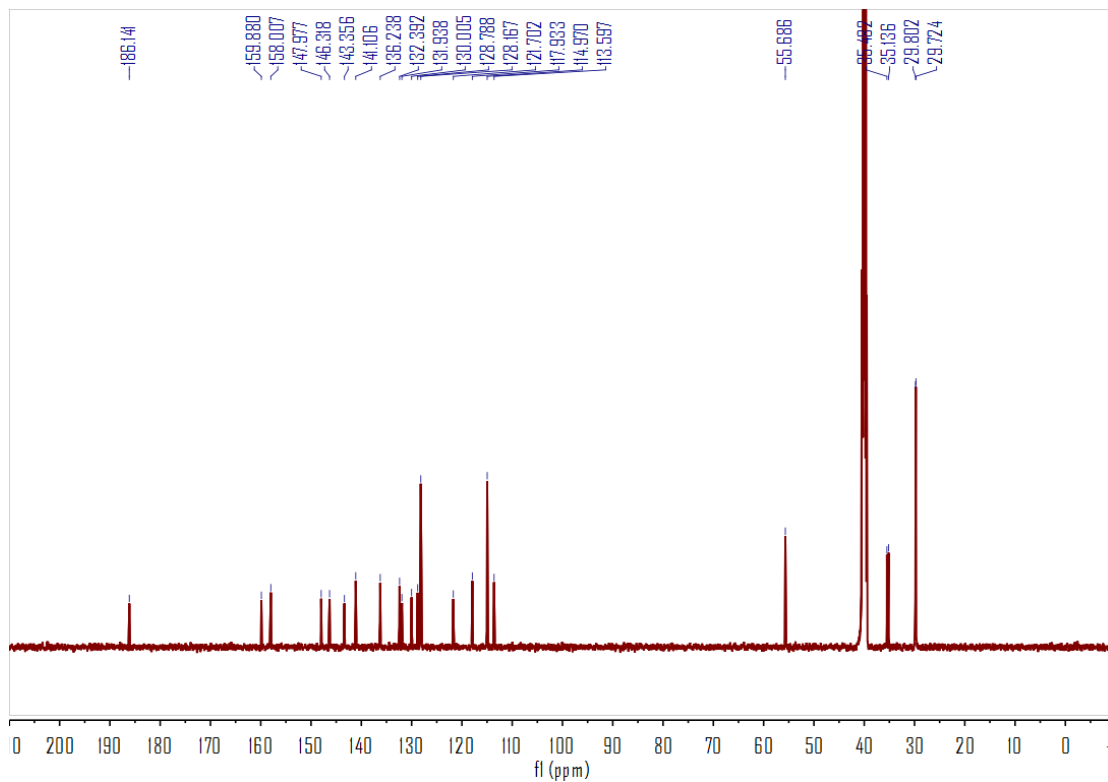

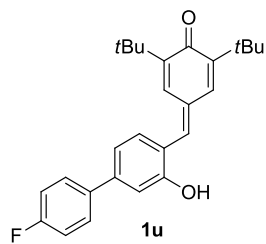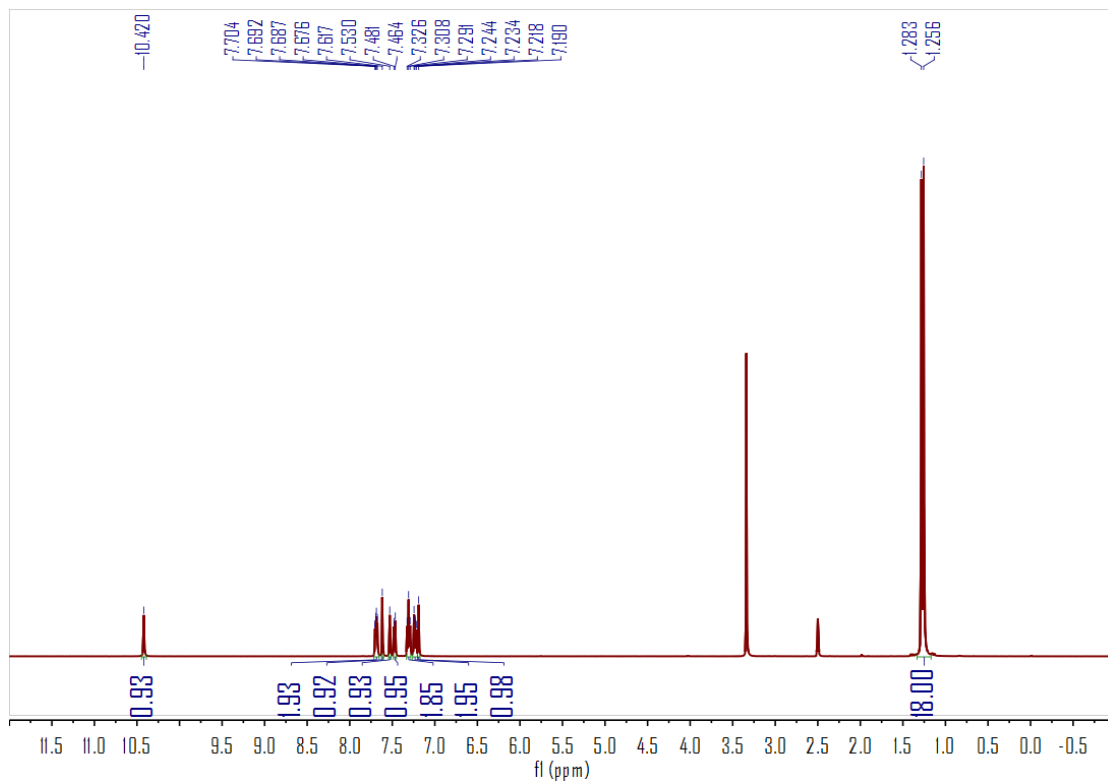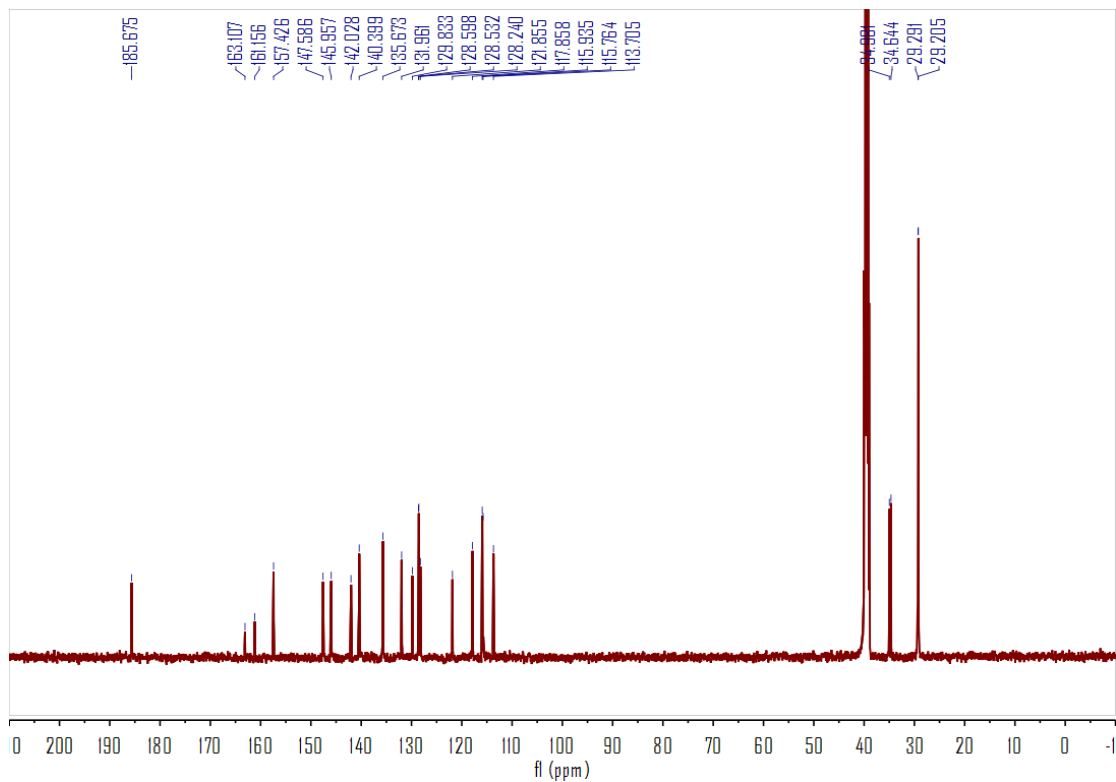

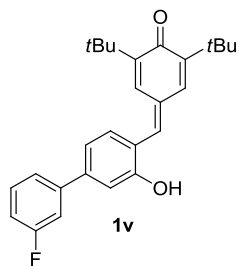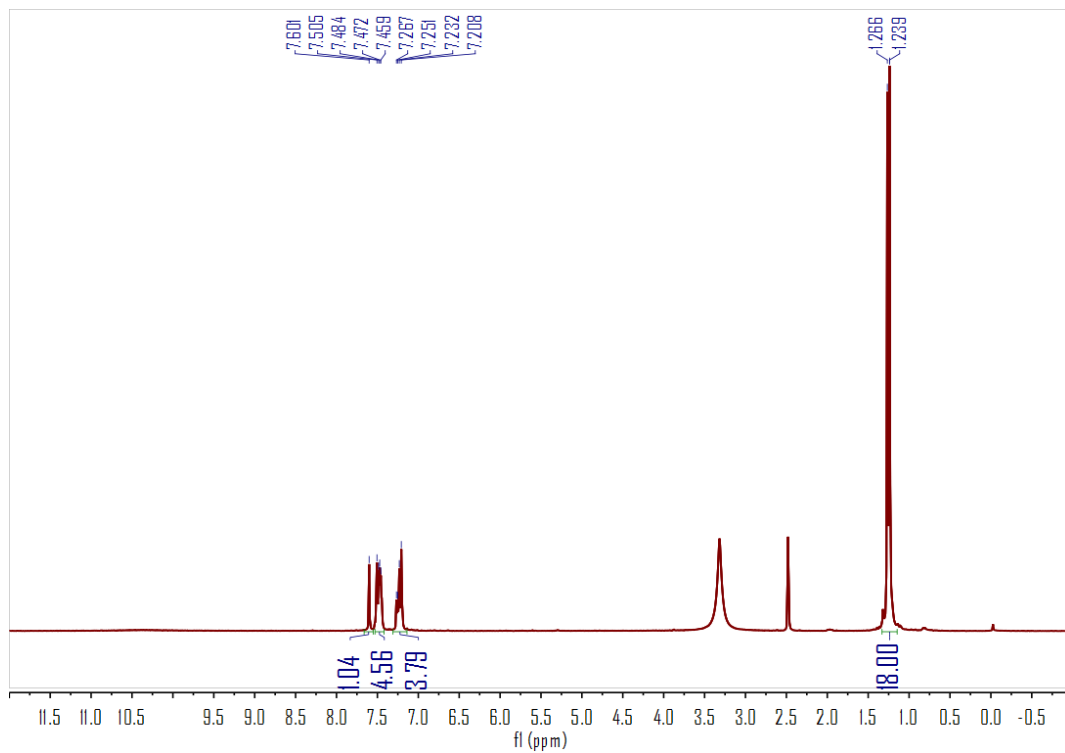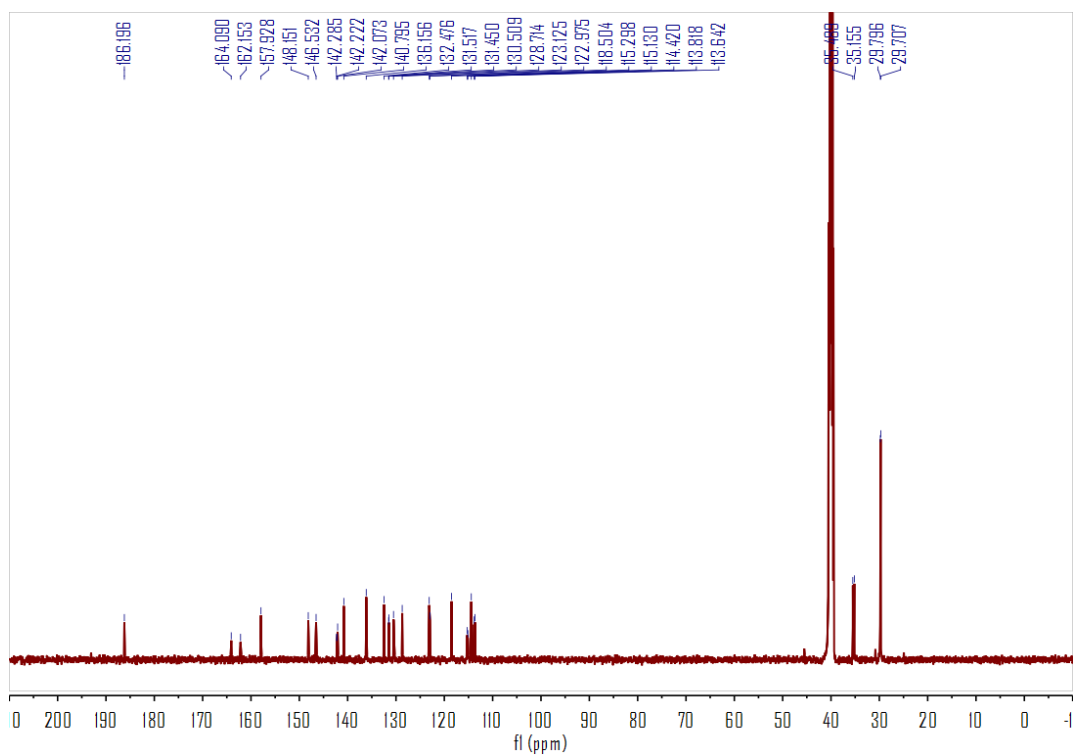



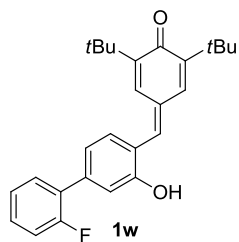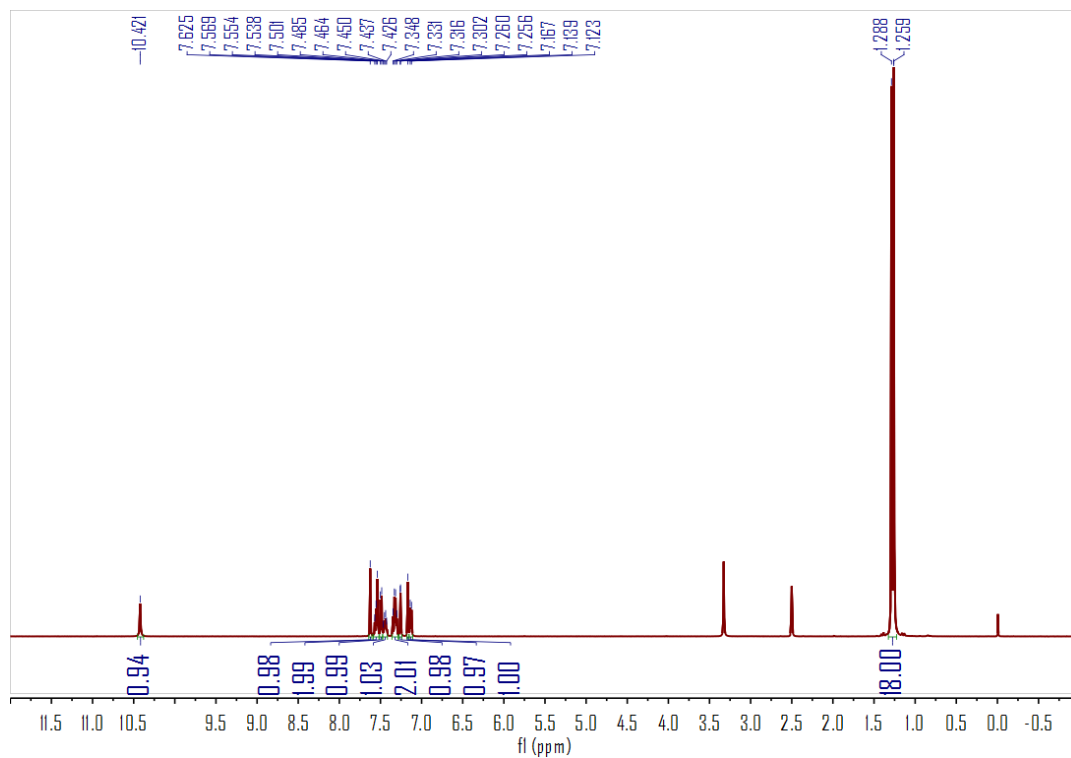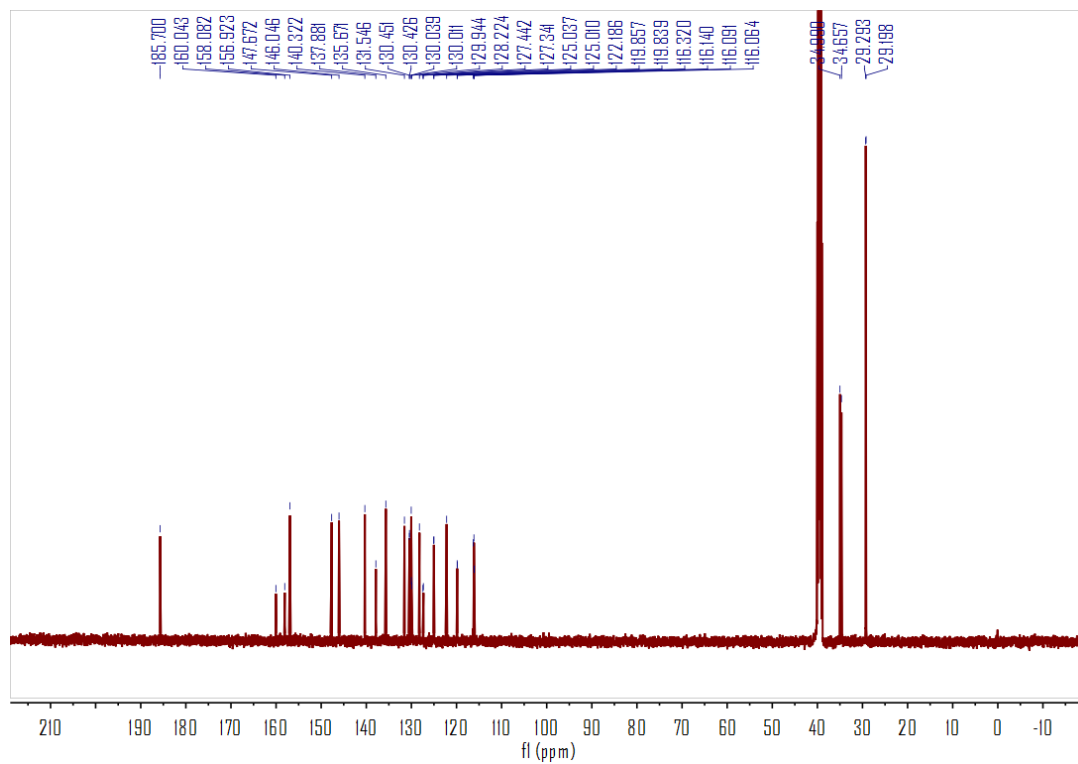

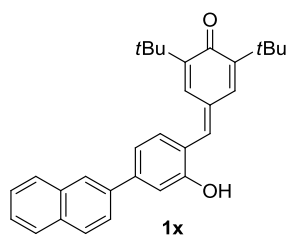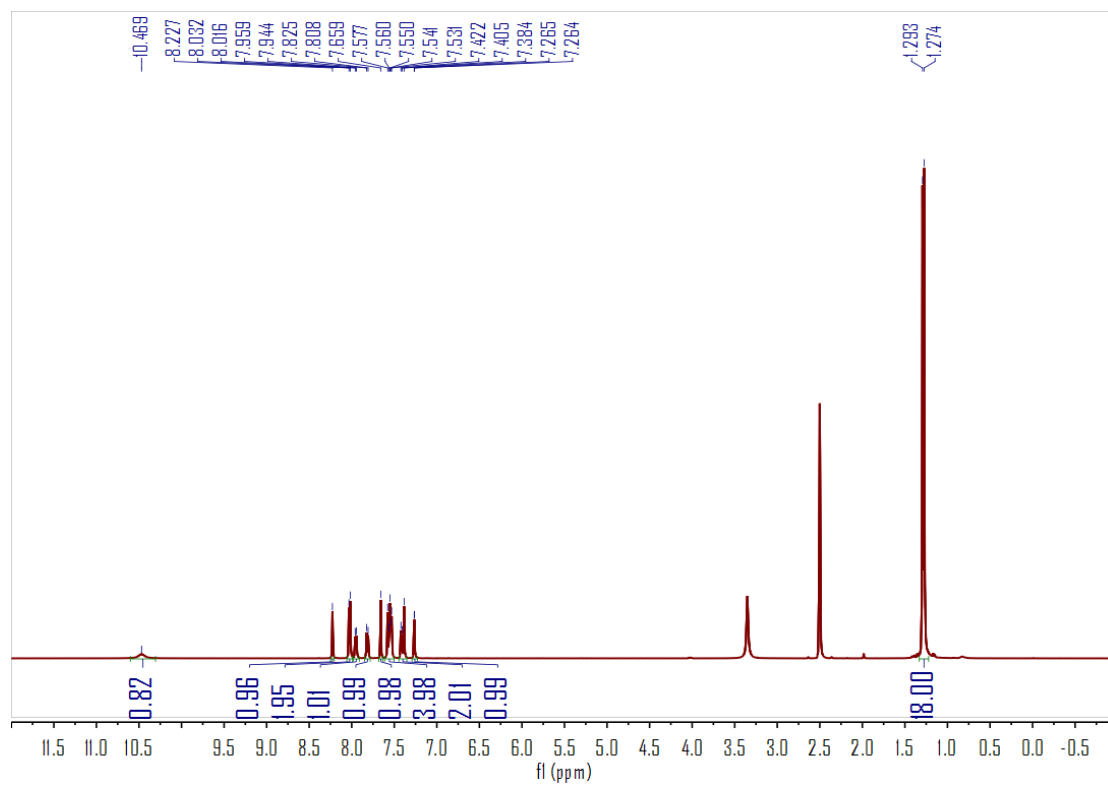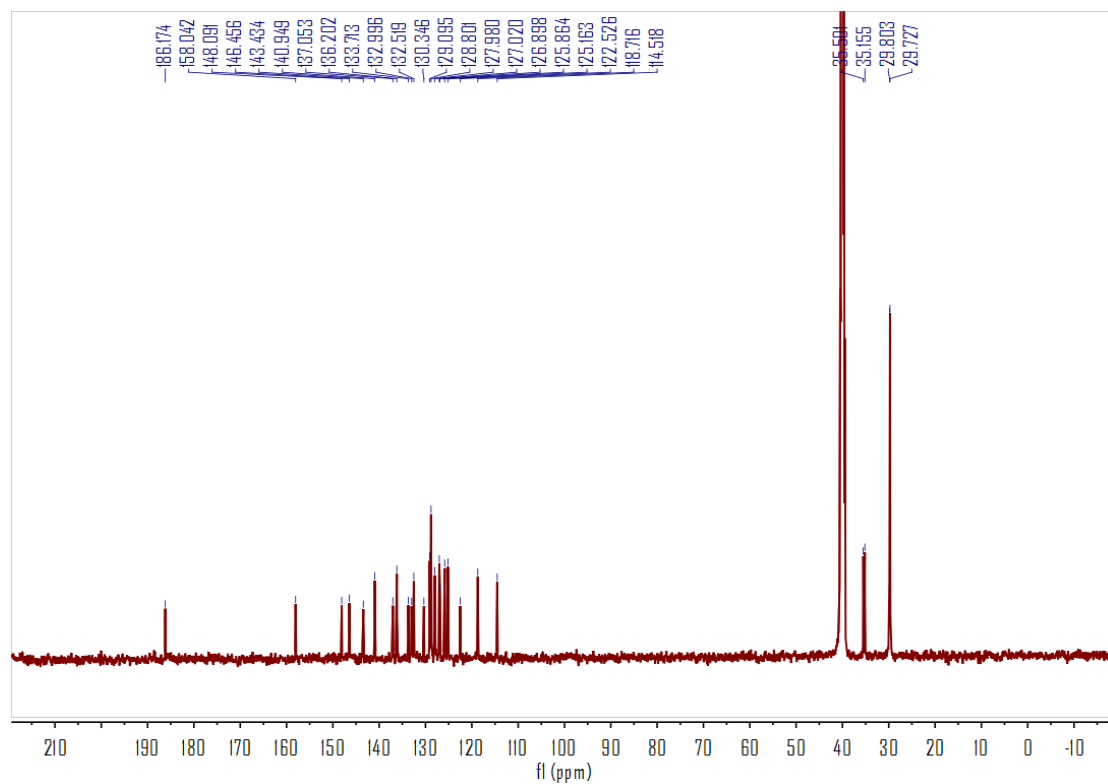

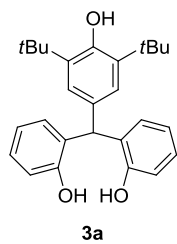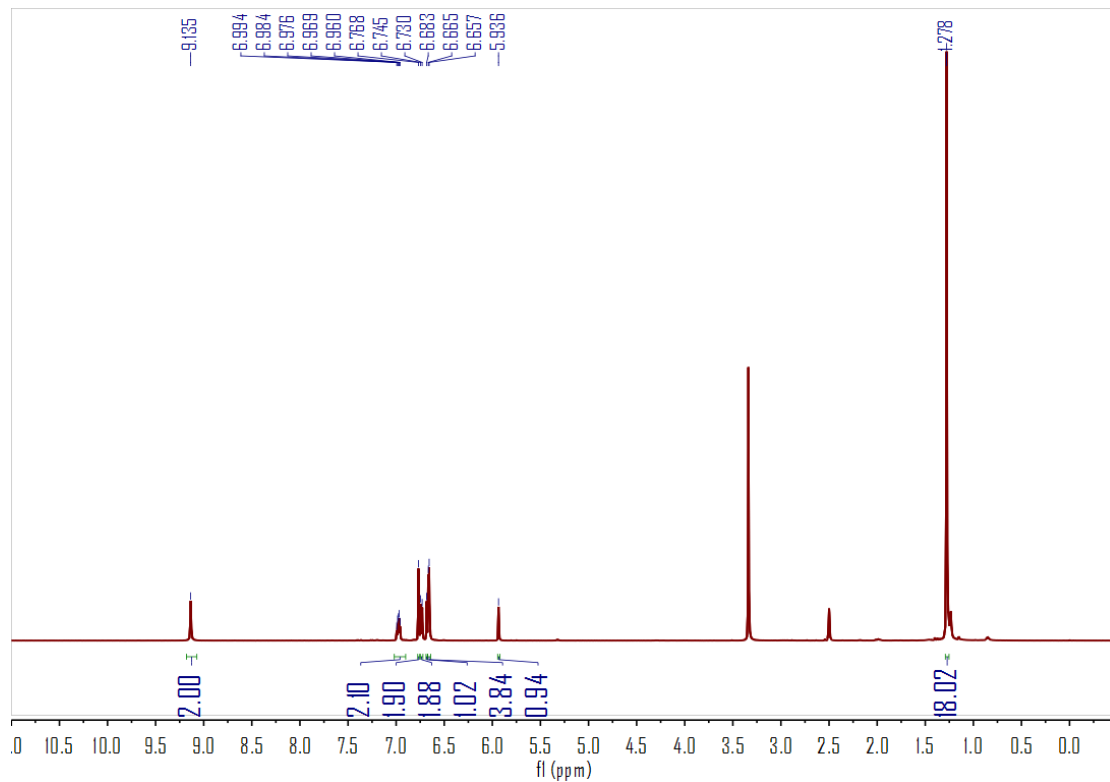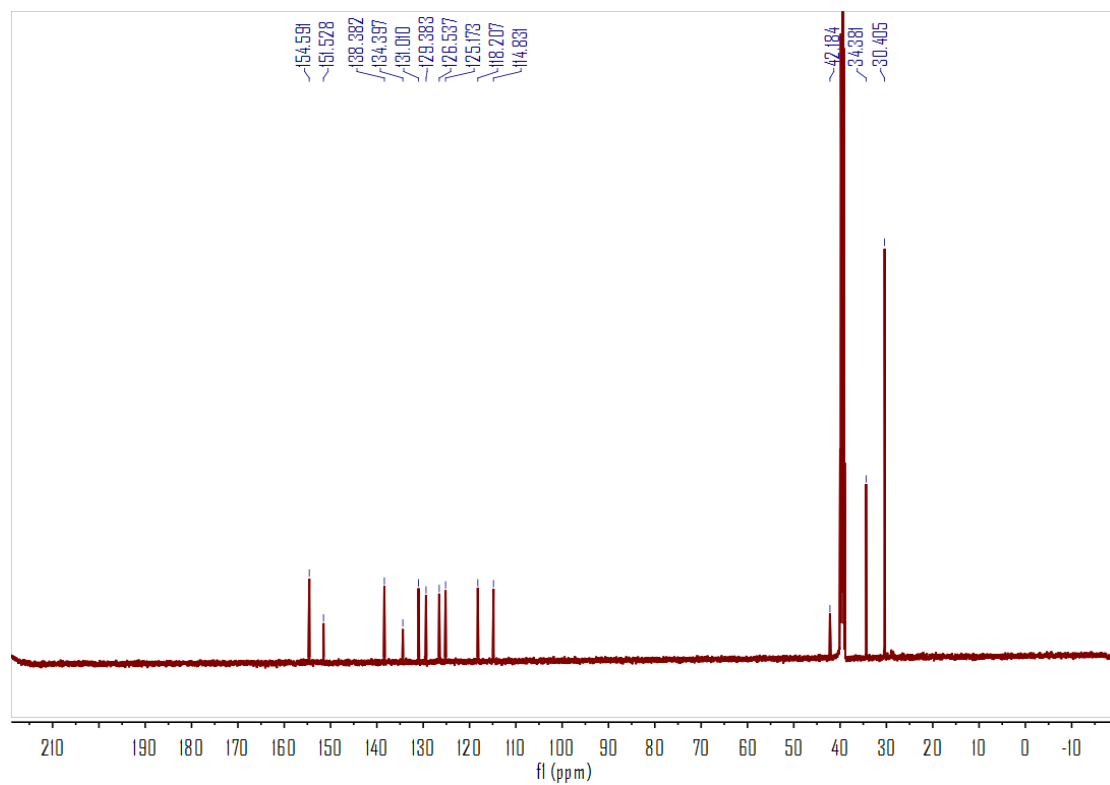

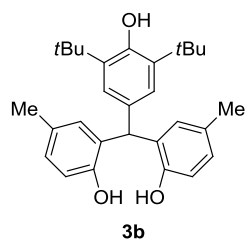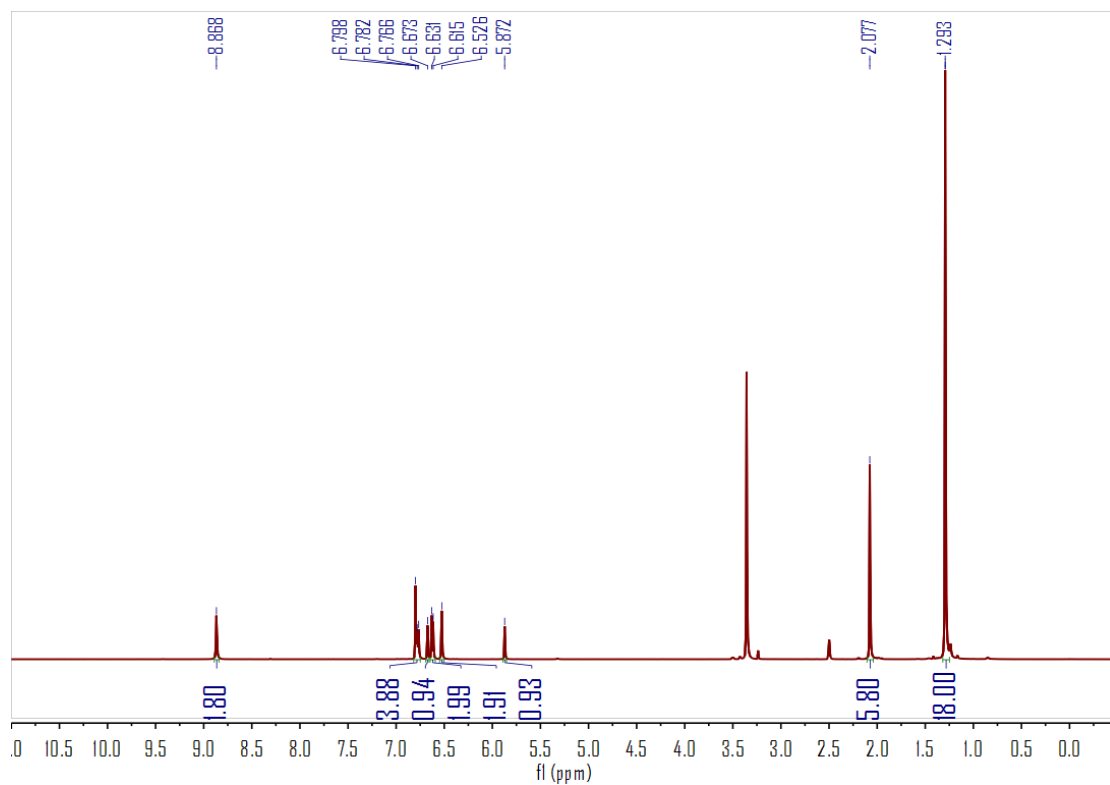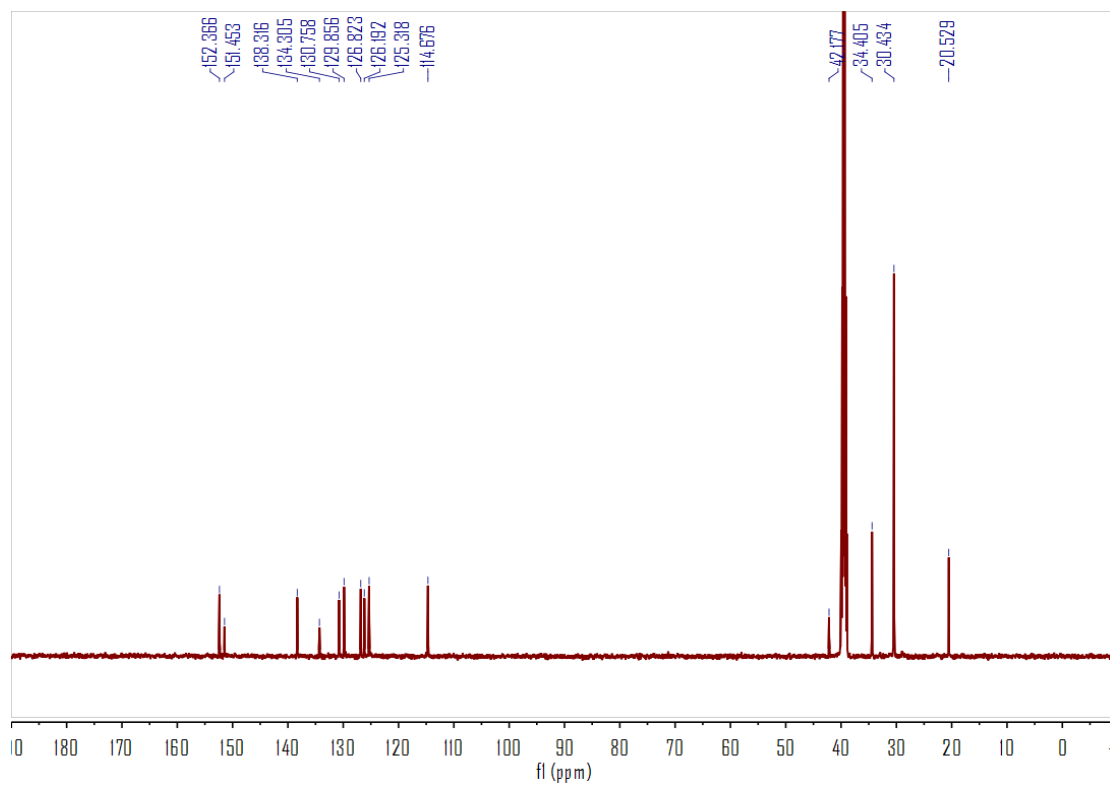

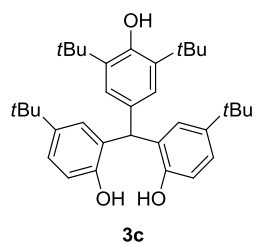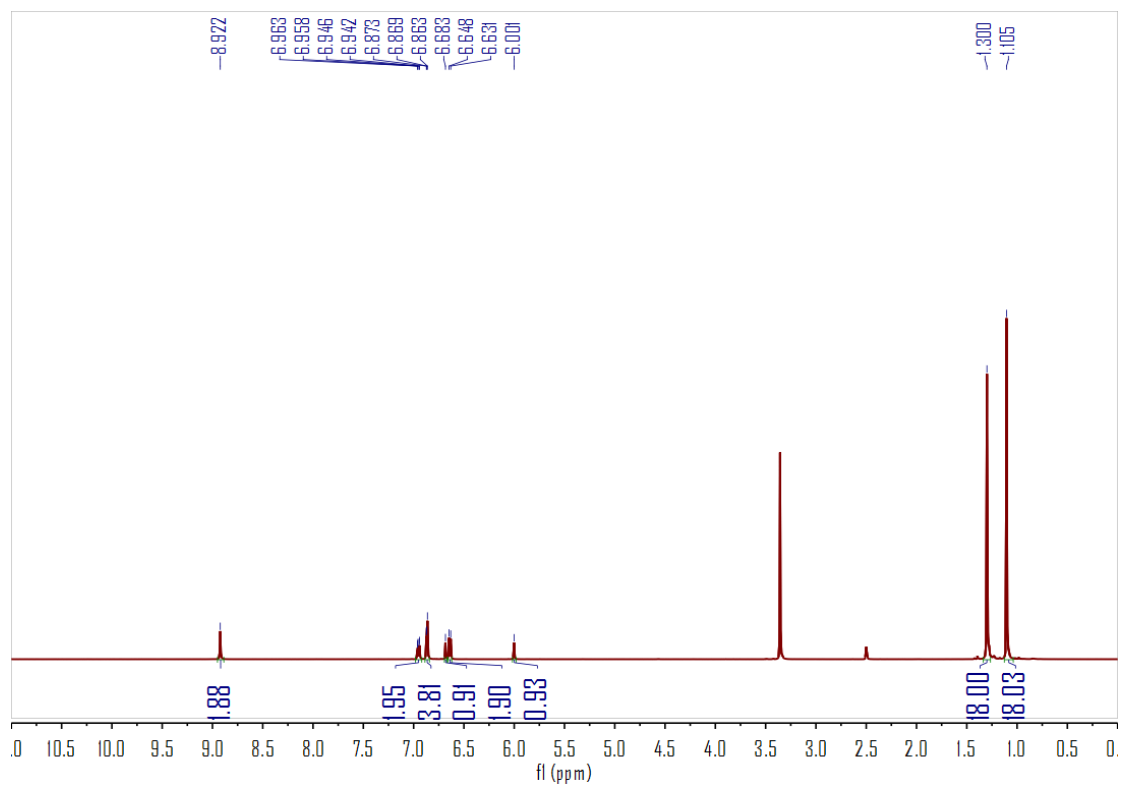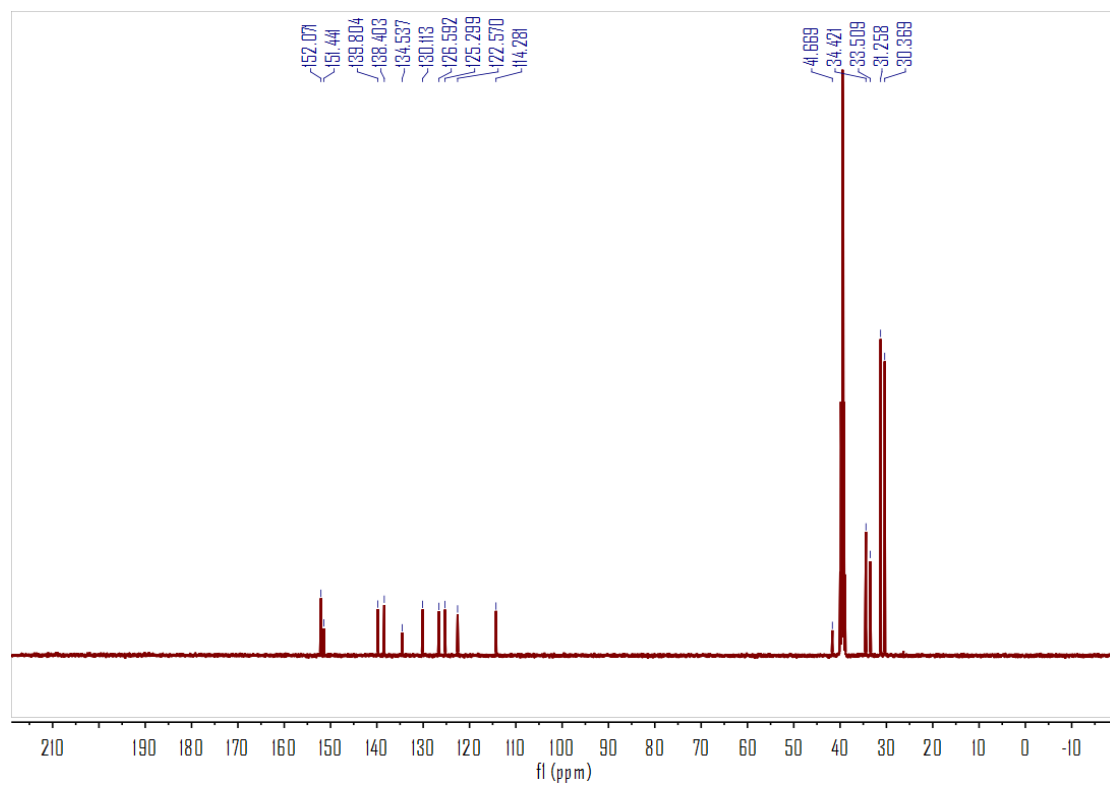

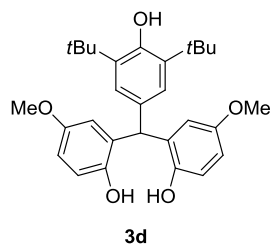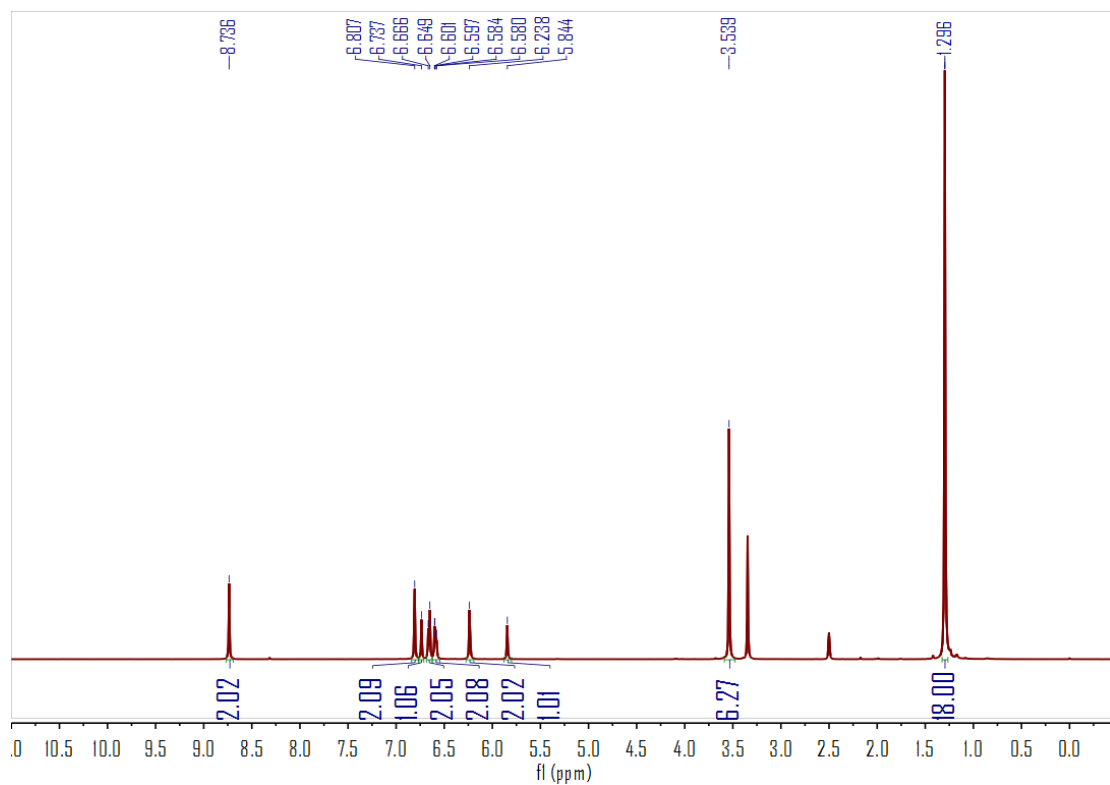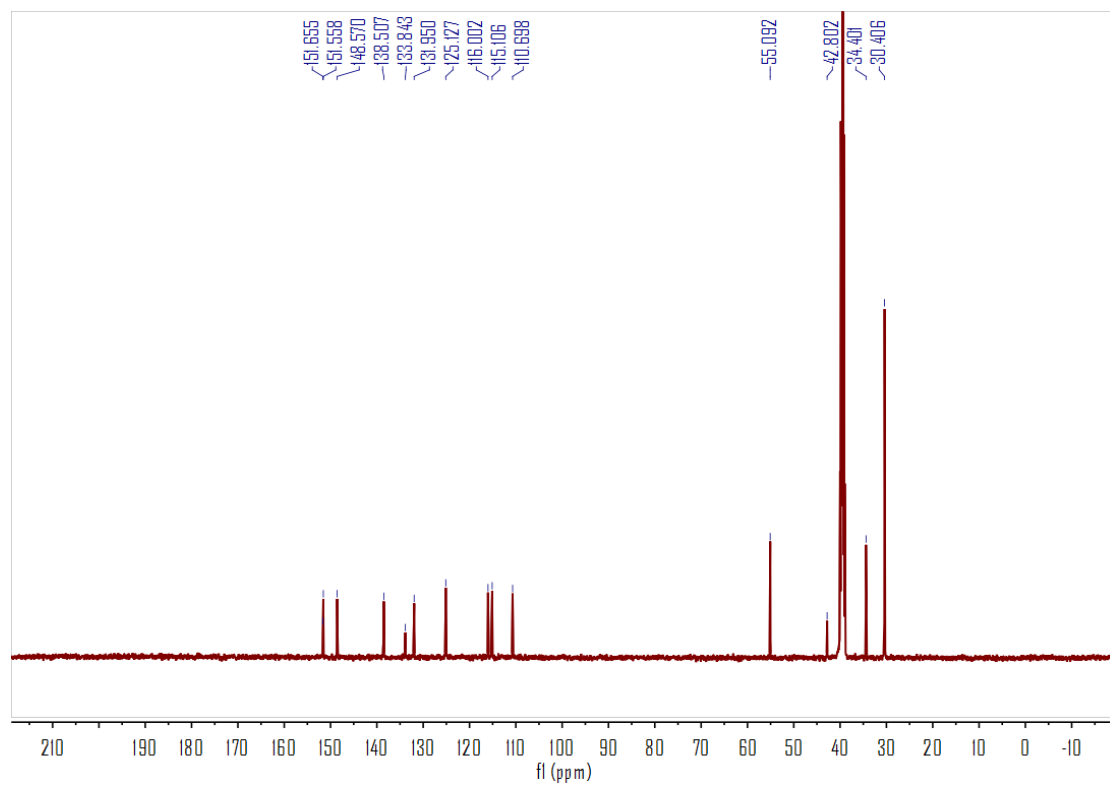

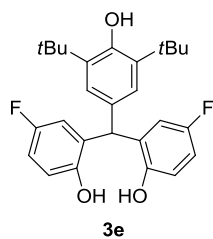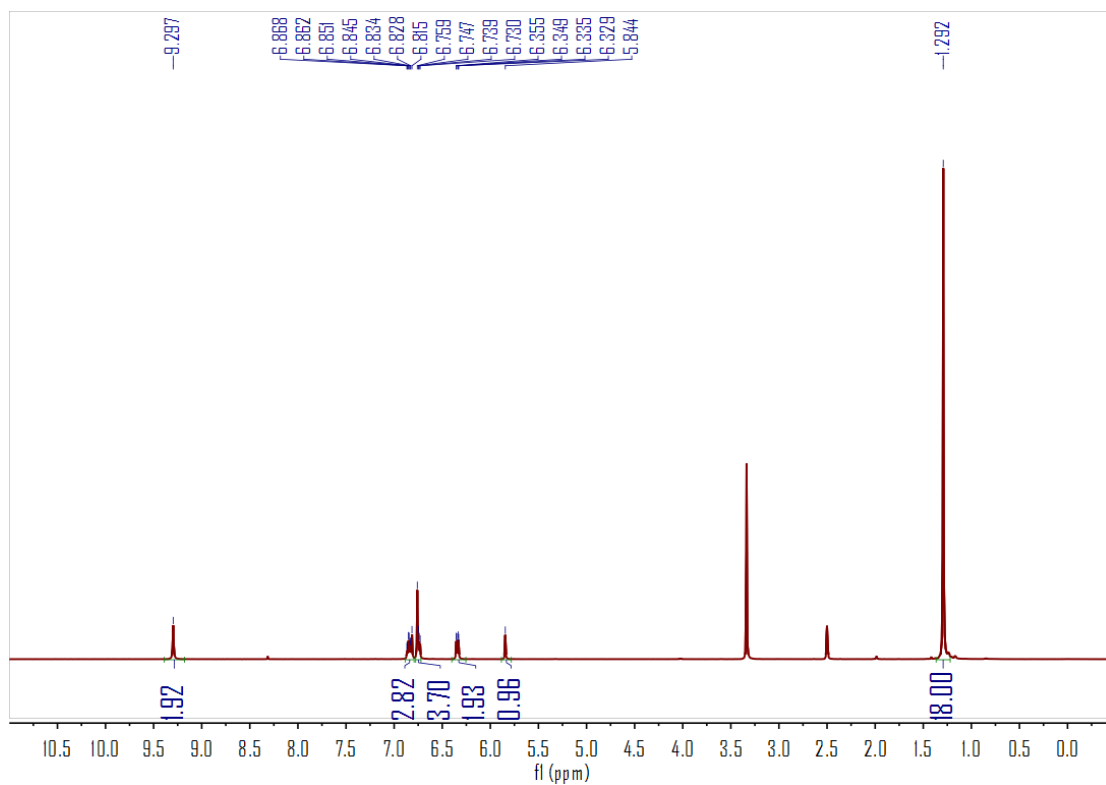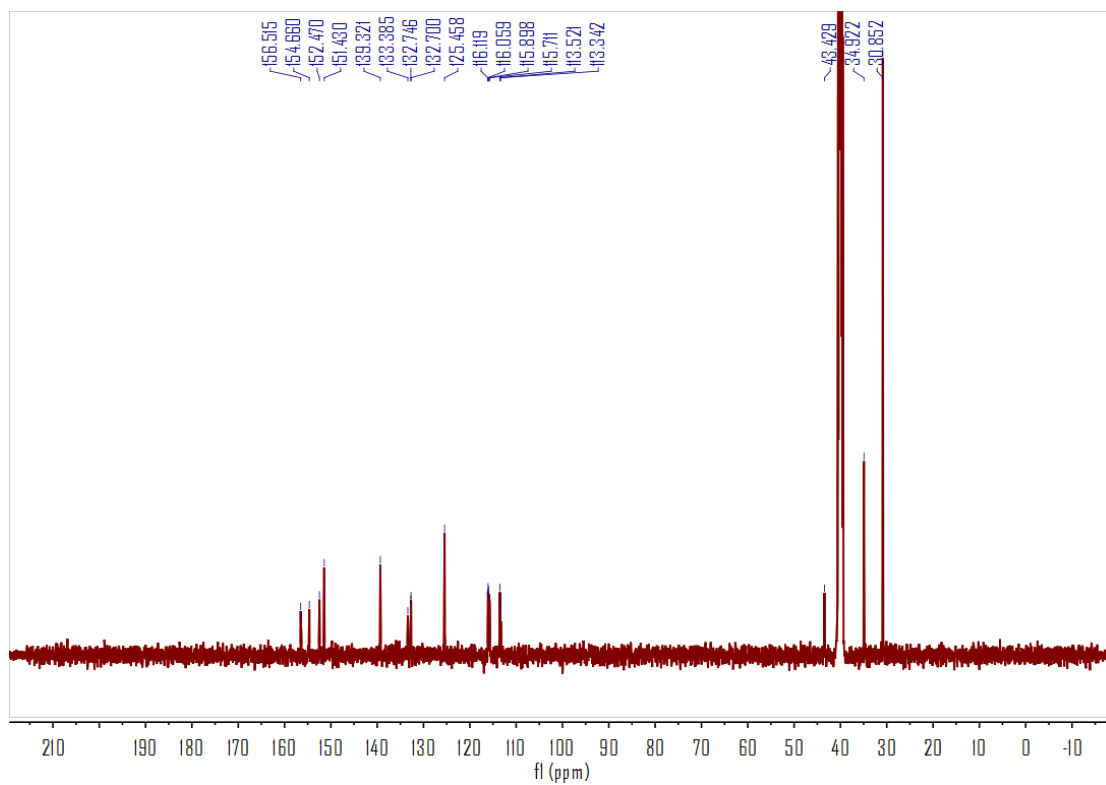

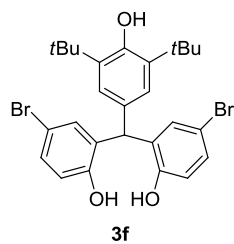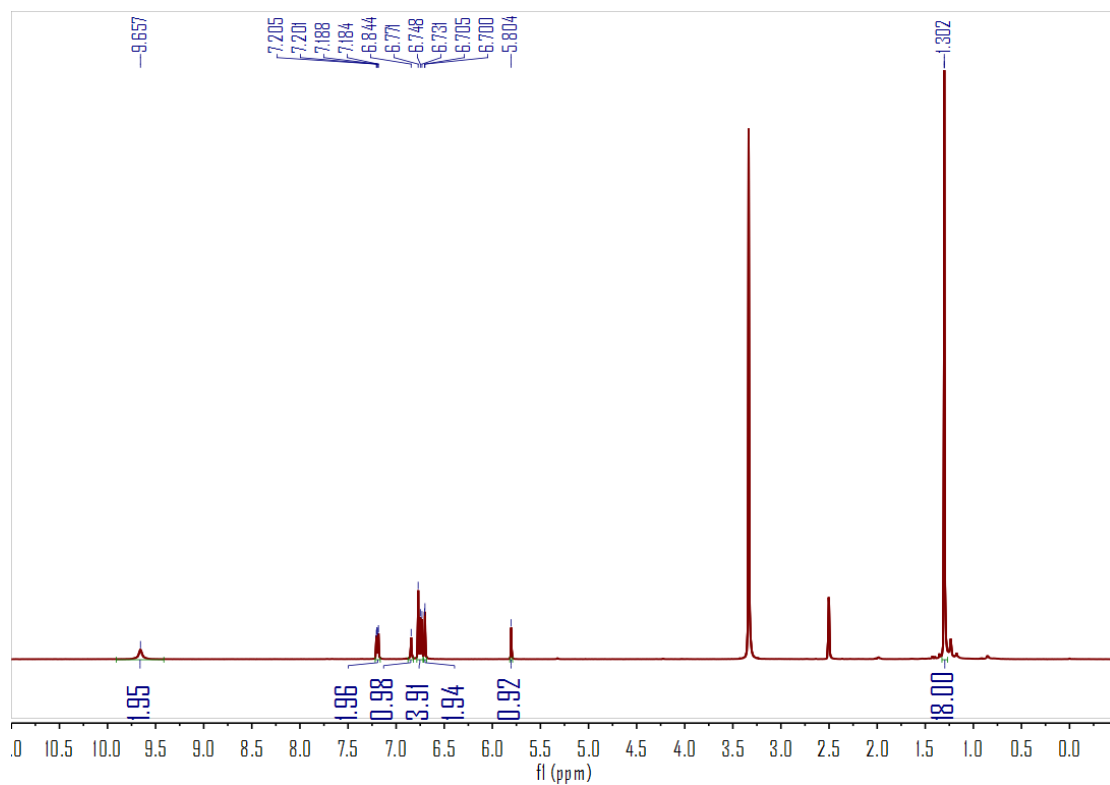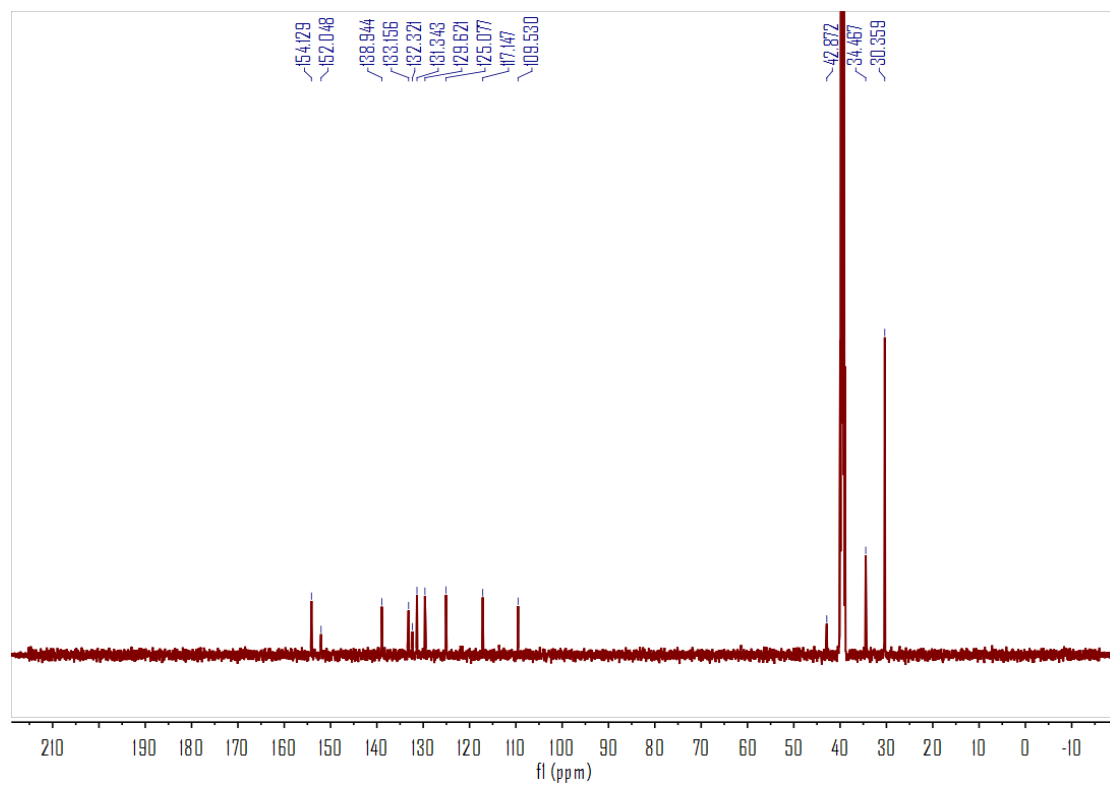



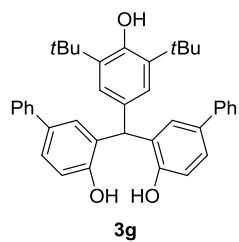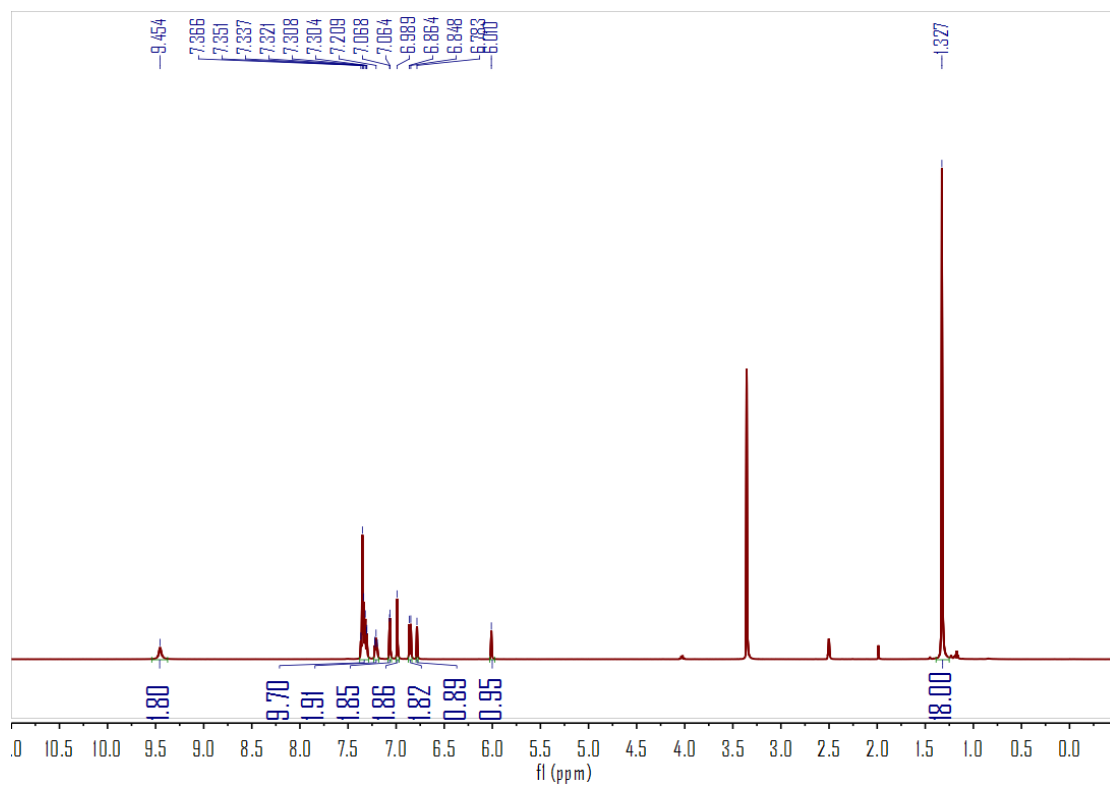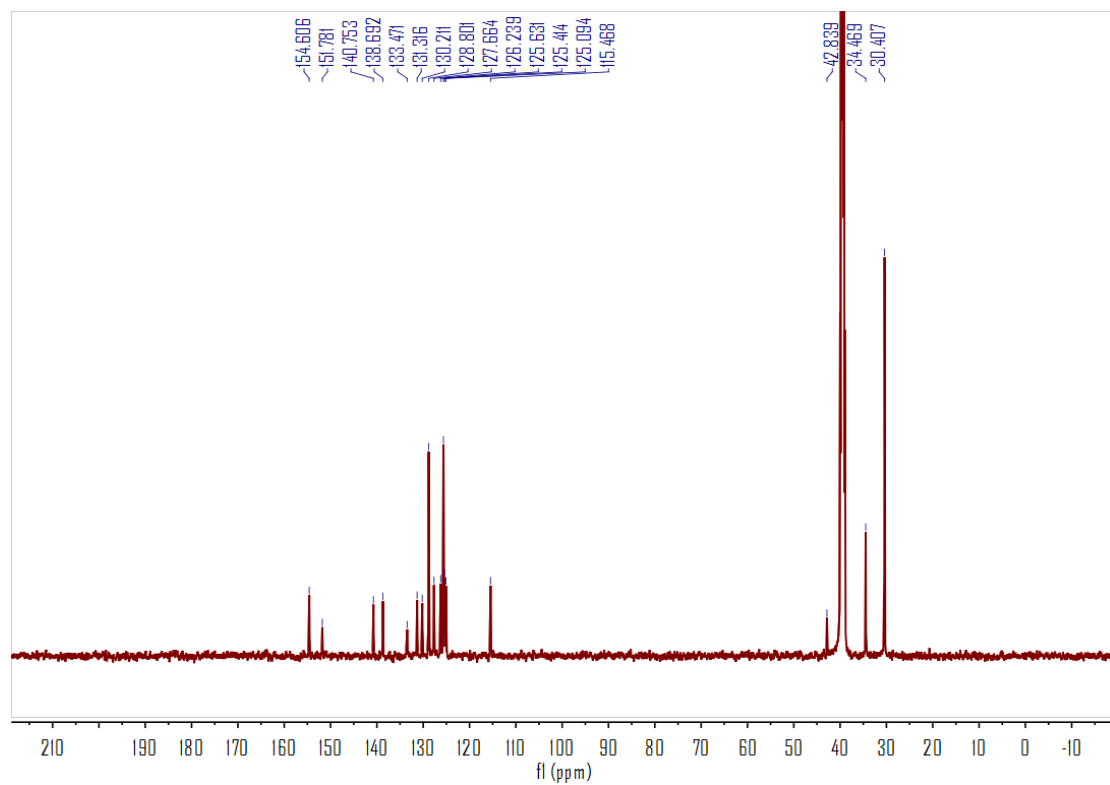

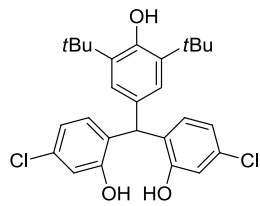

3h

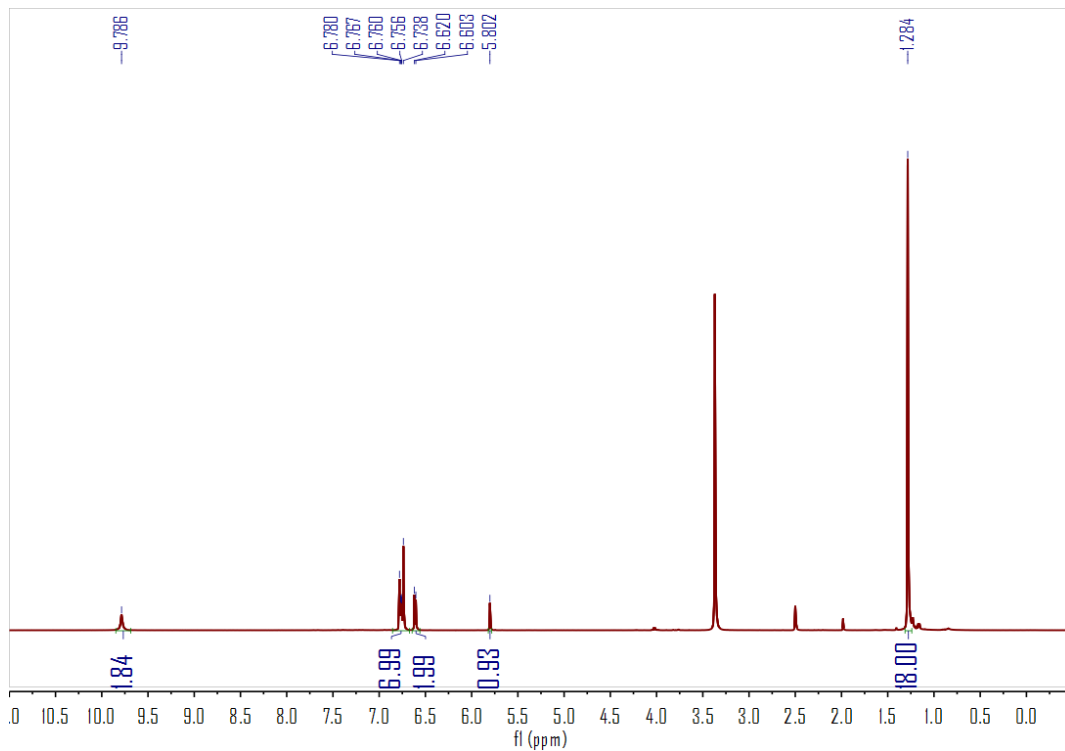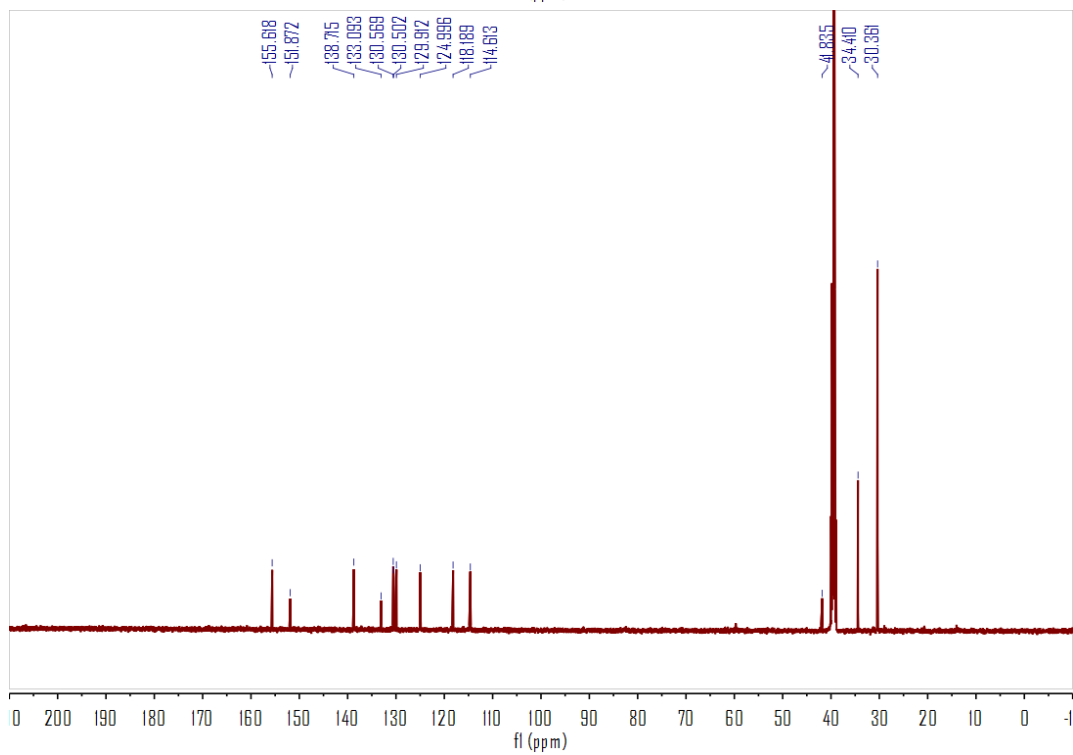

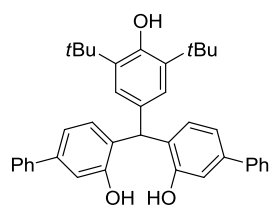

3i

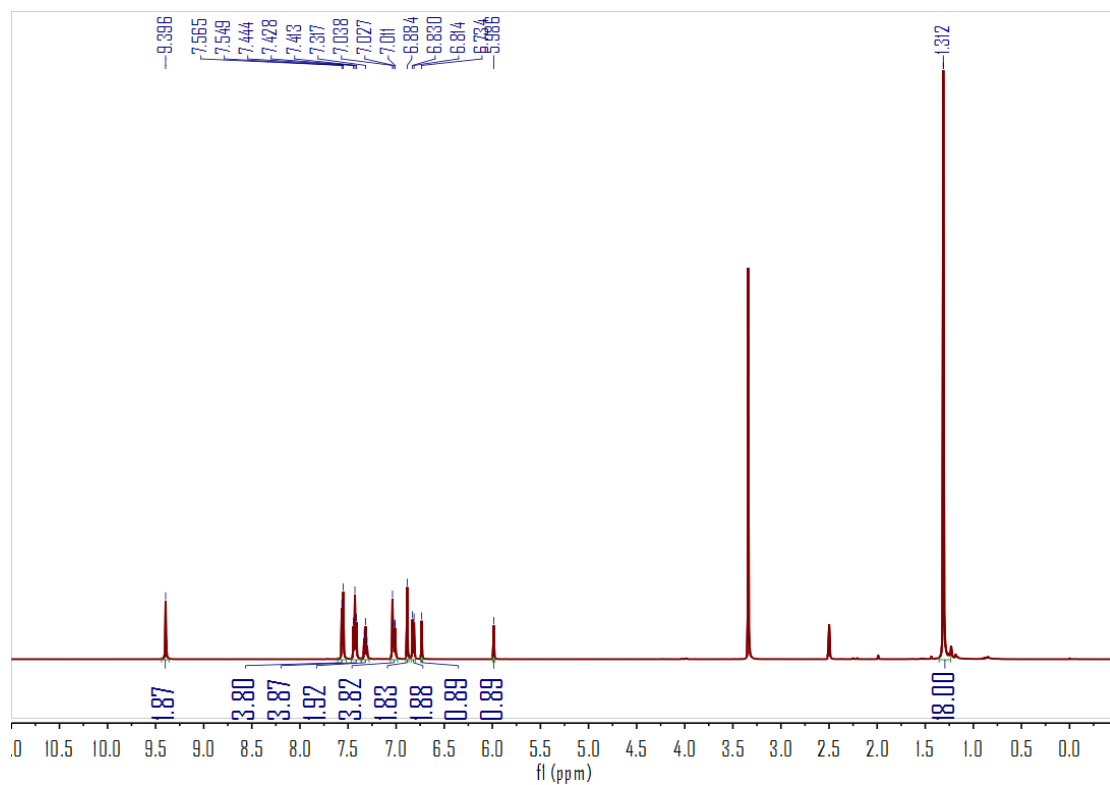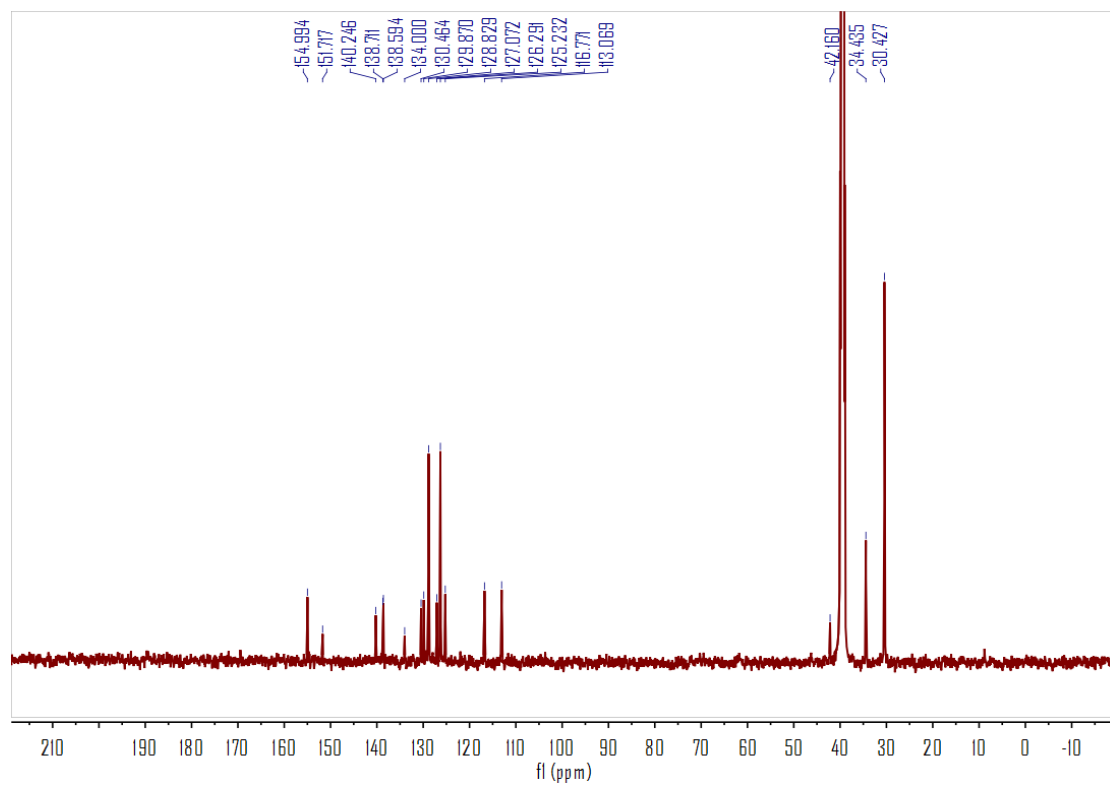

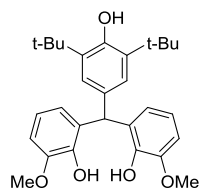

3j

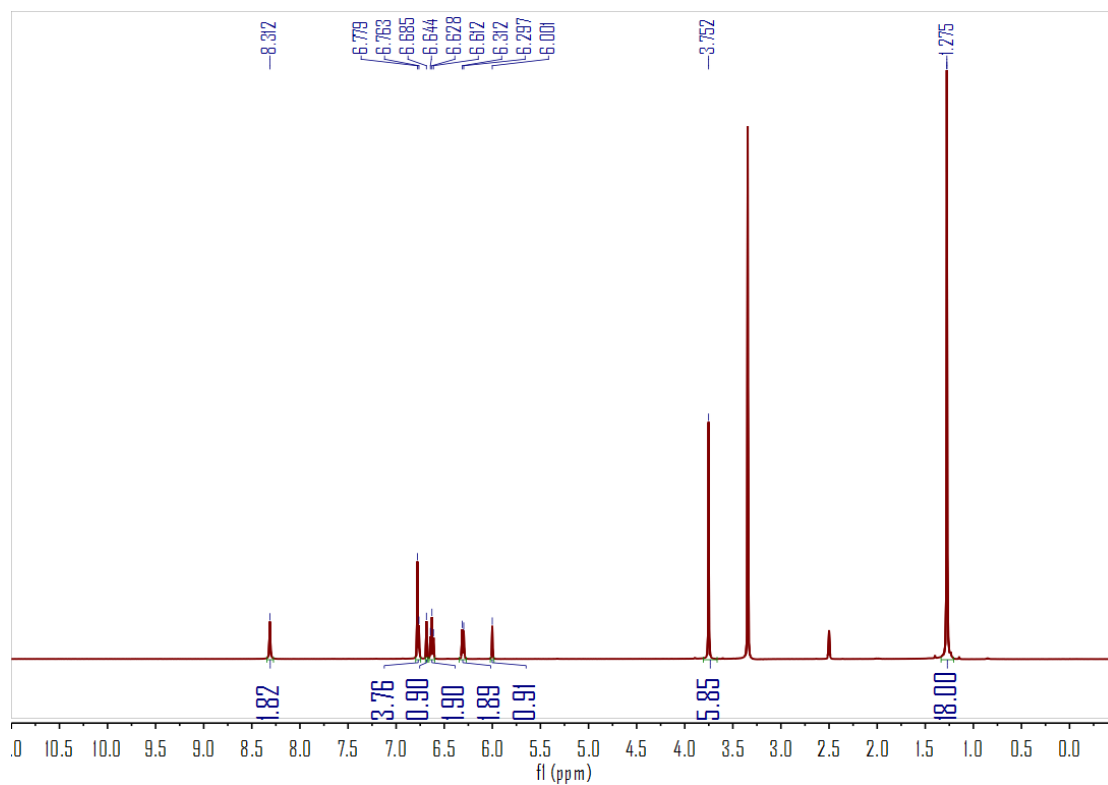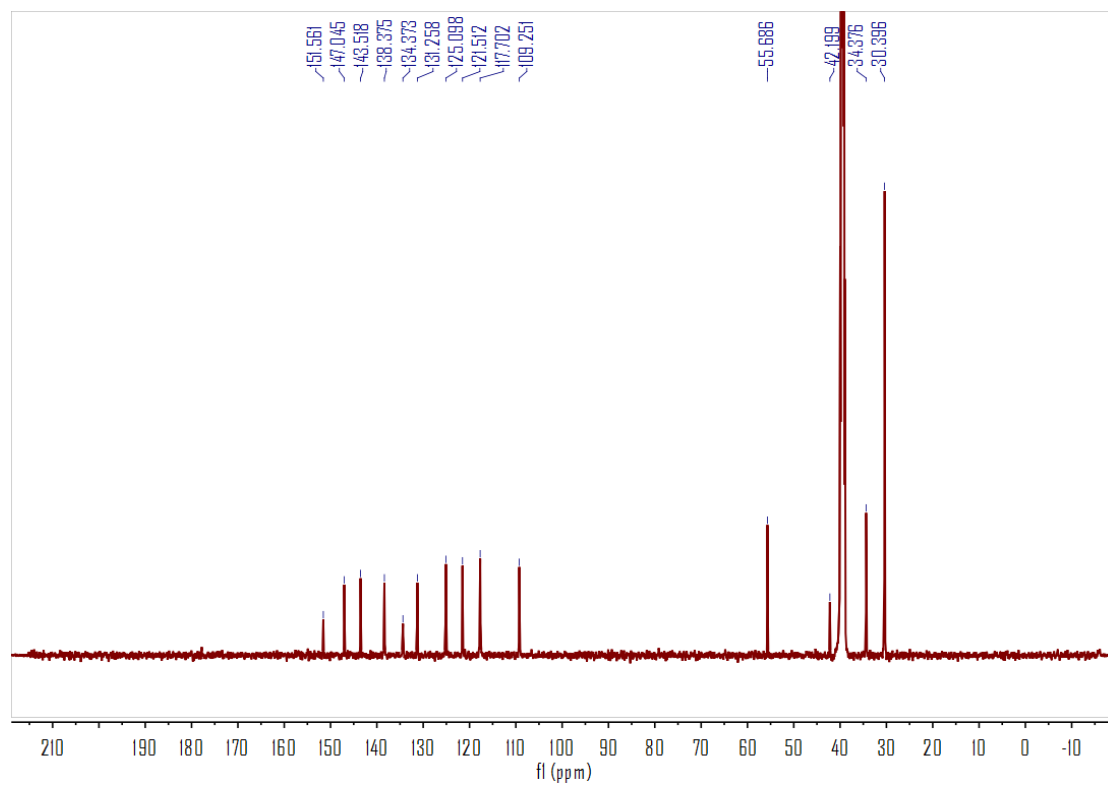

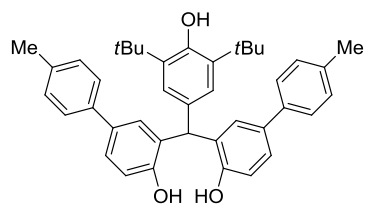

3k

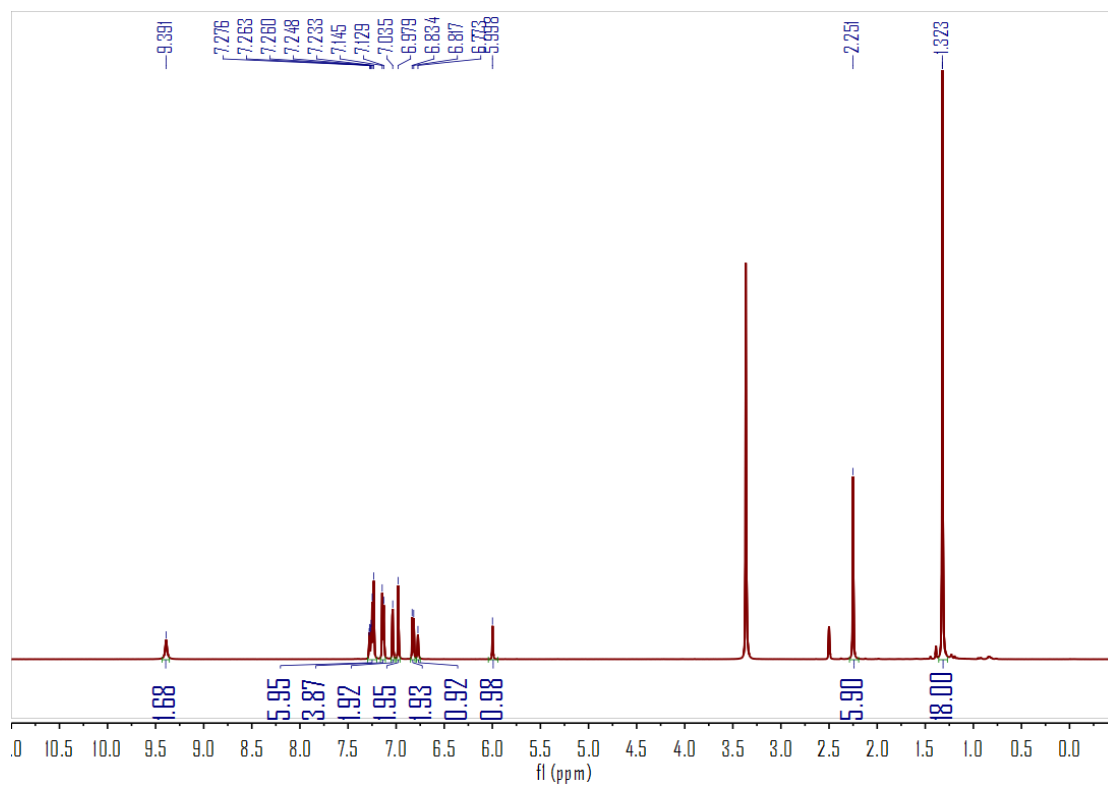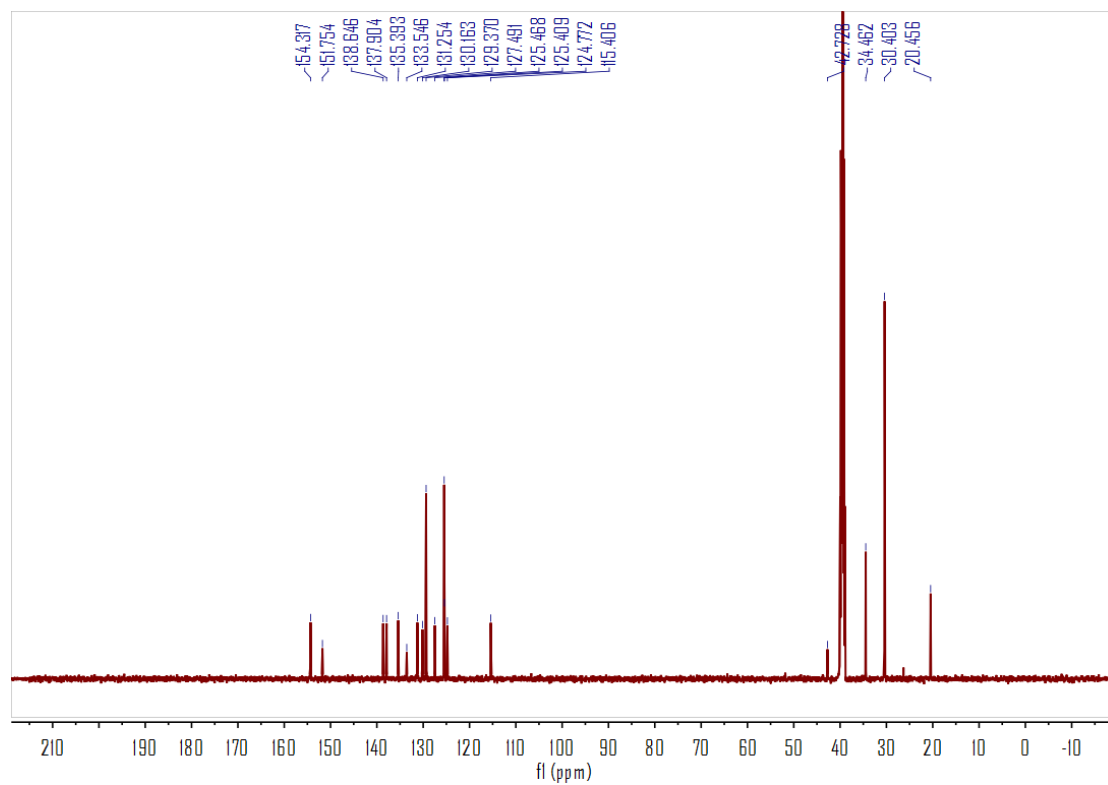

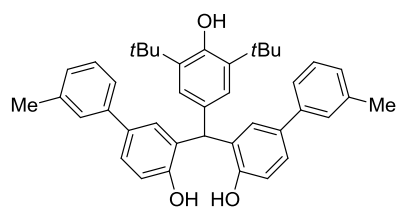

**31**

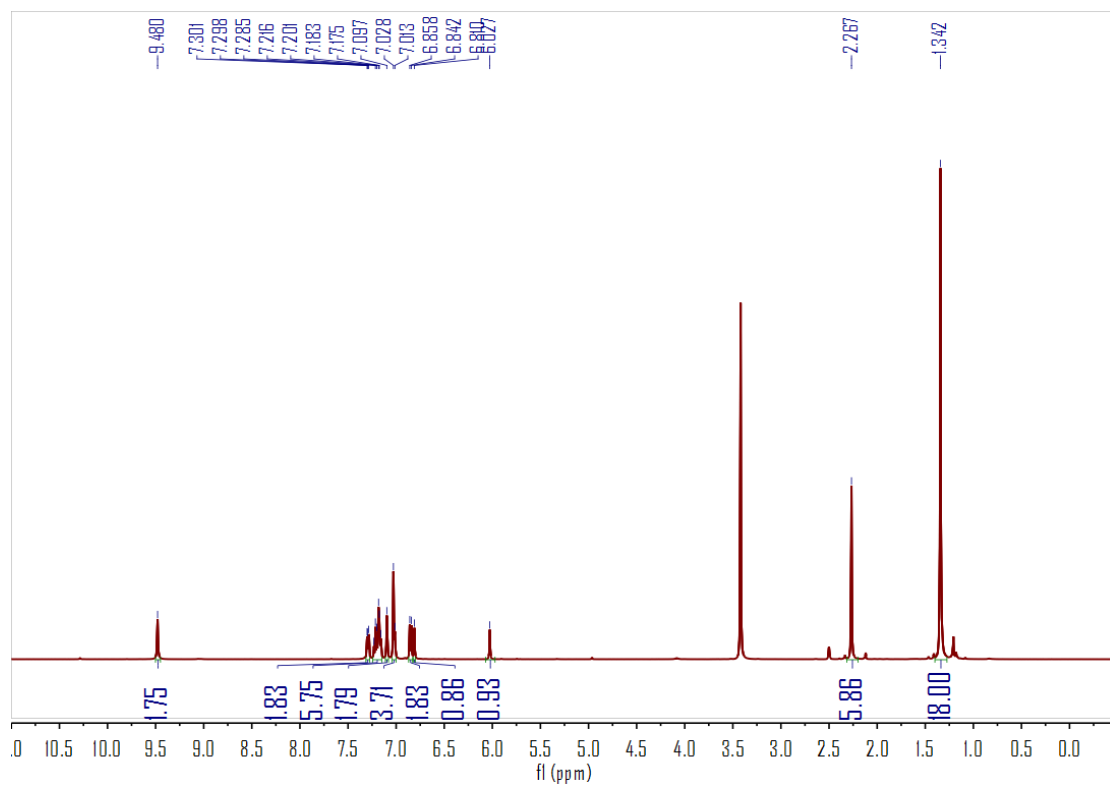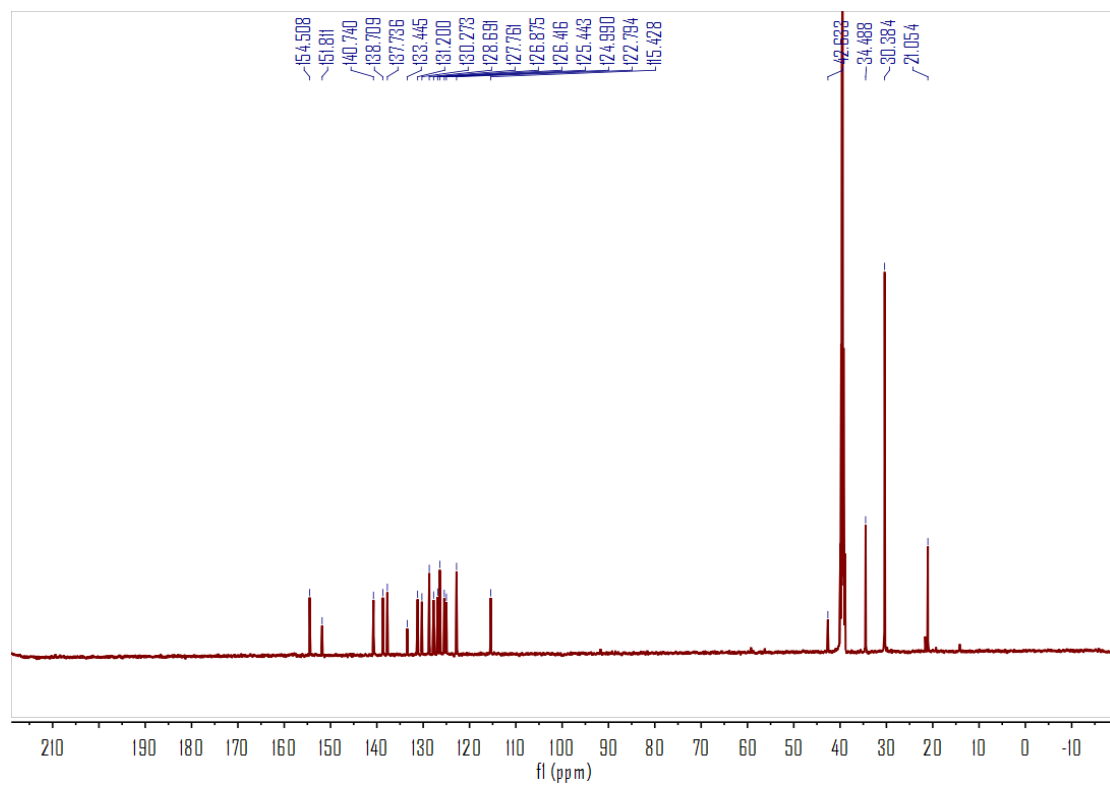

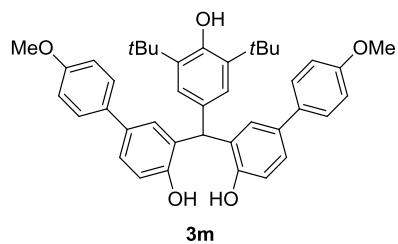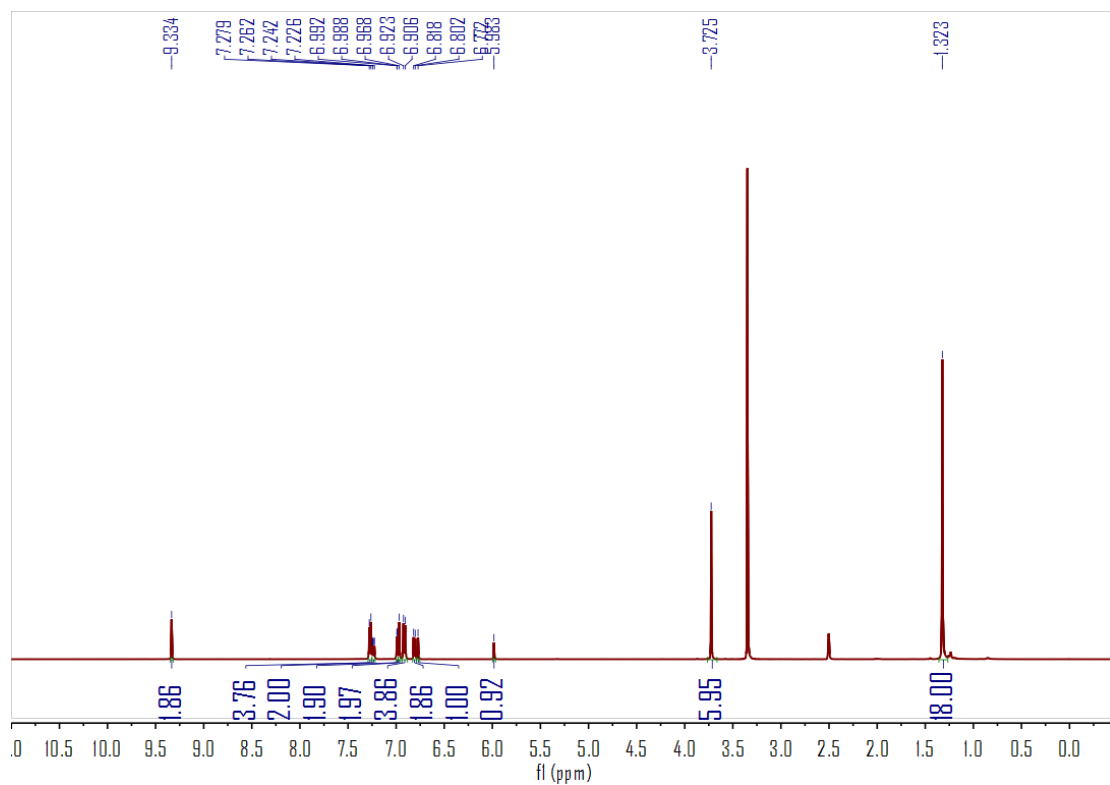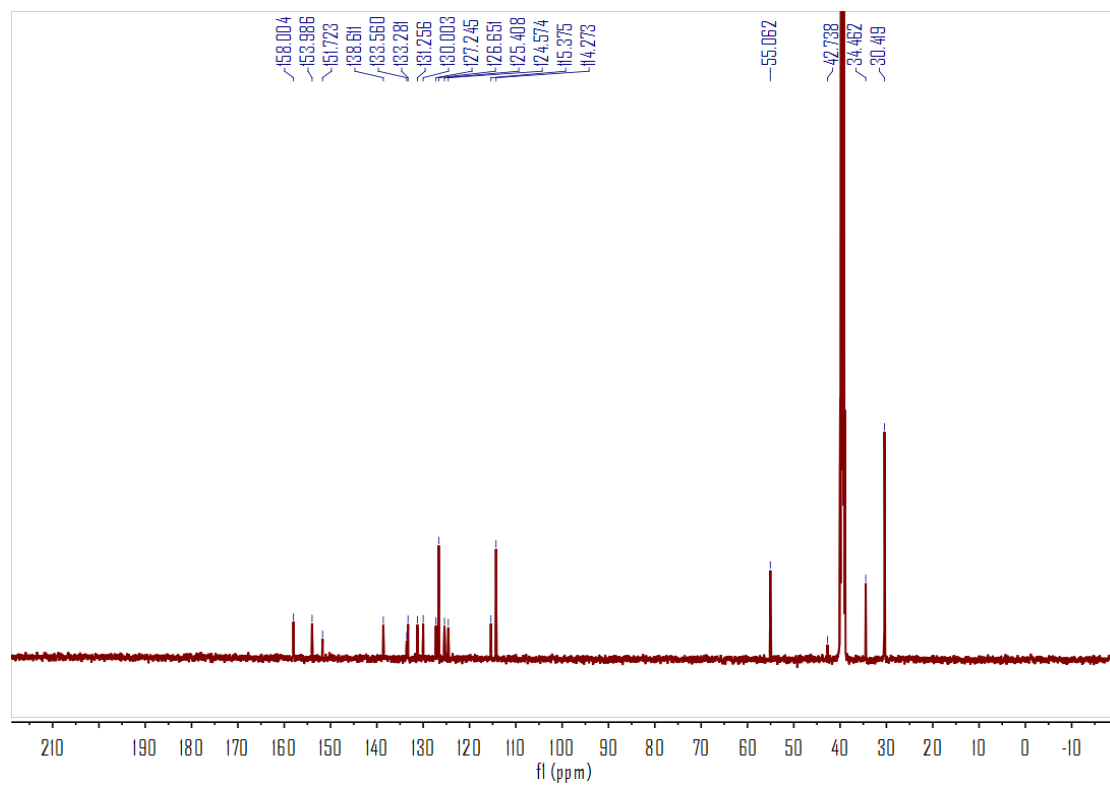

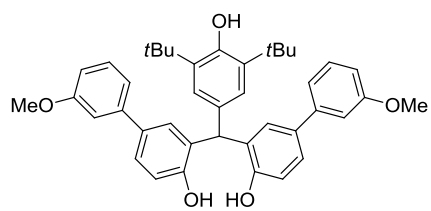

**3n**

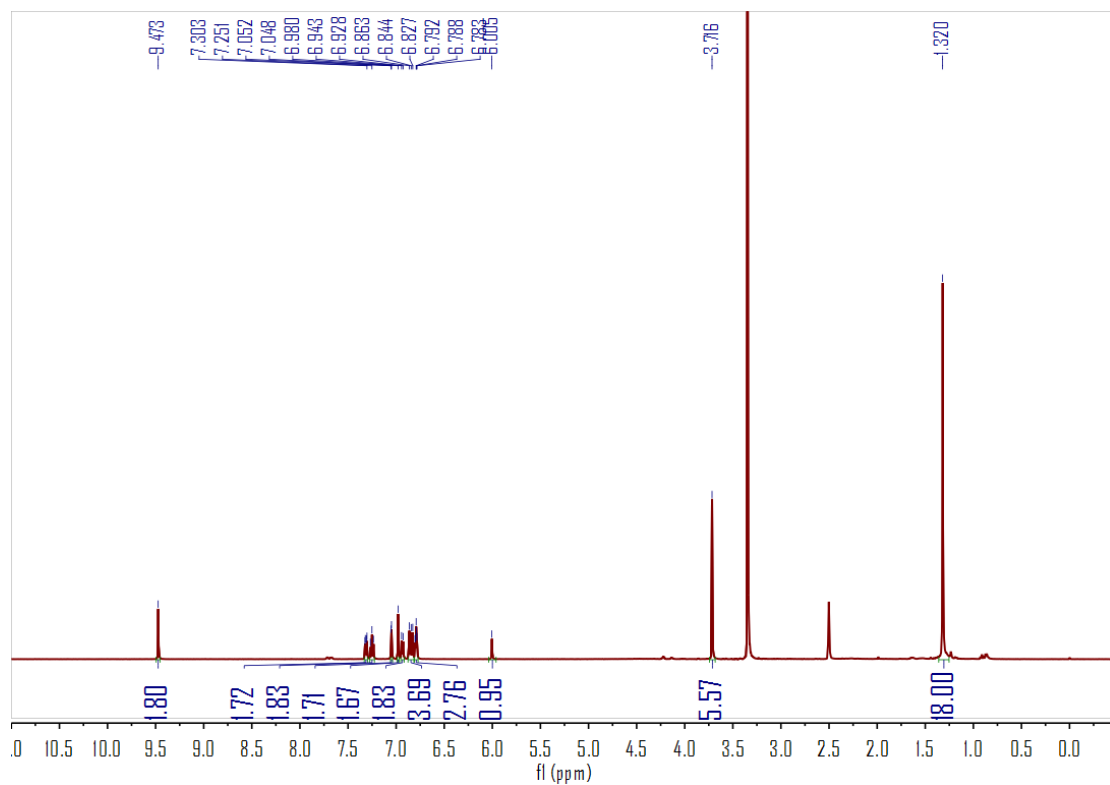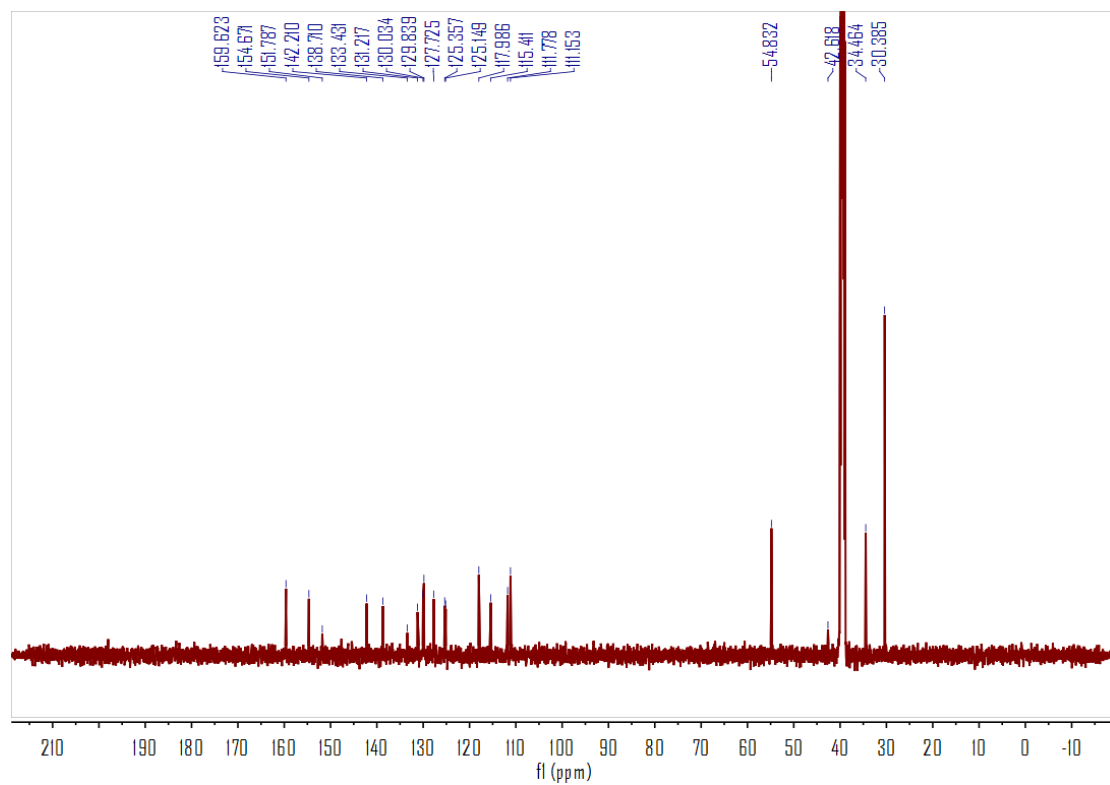



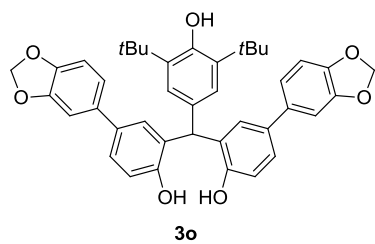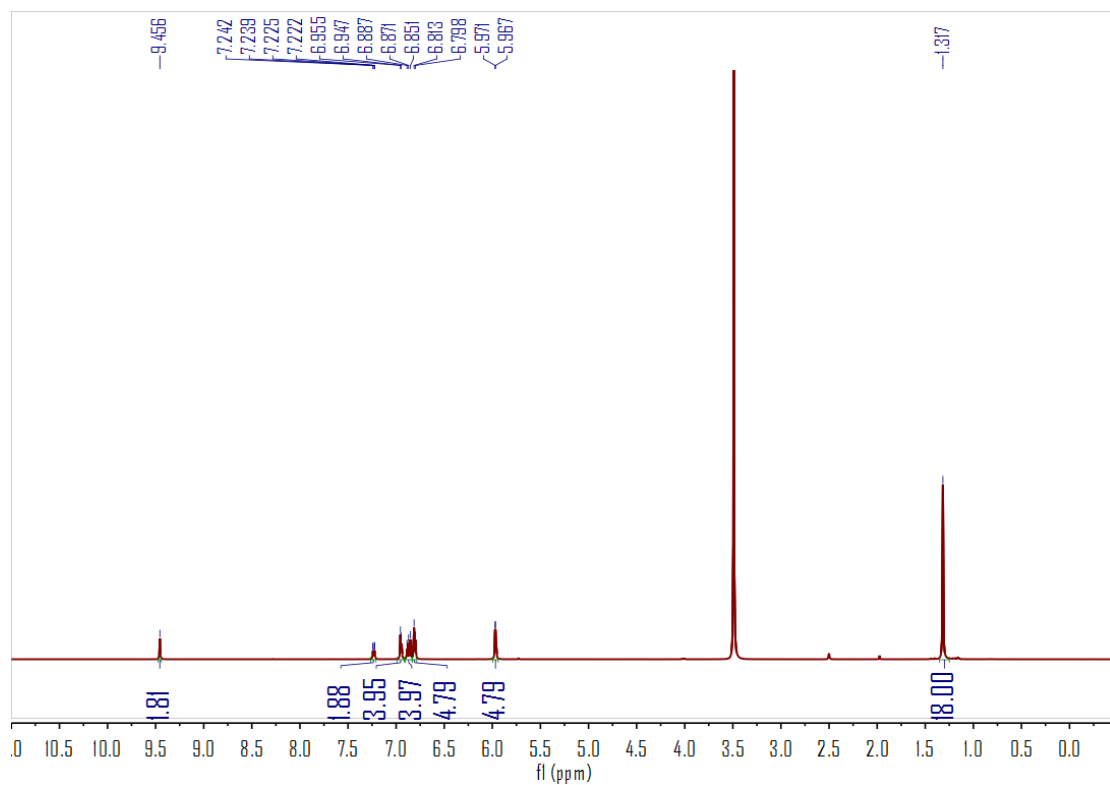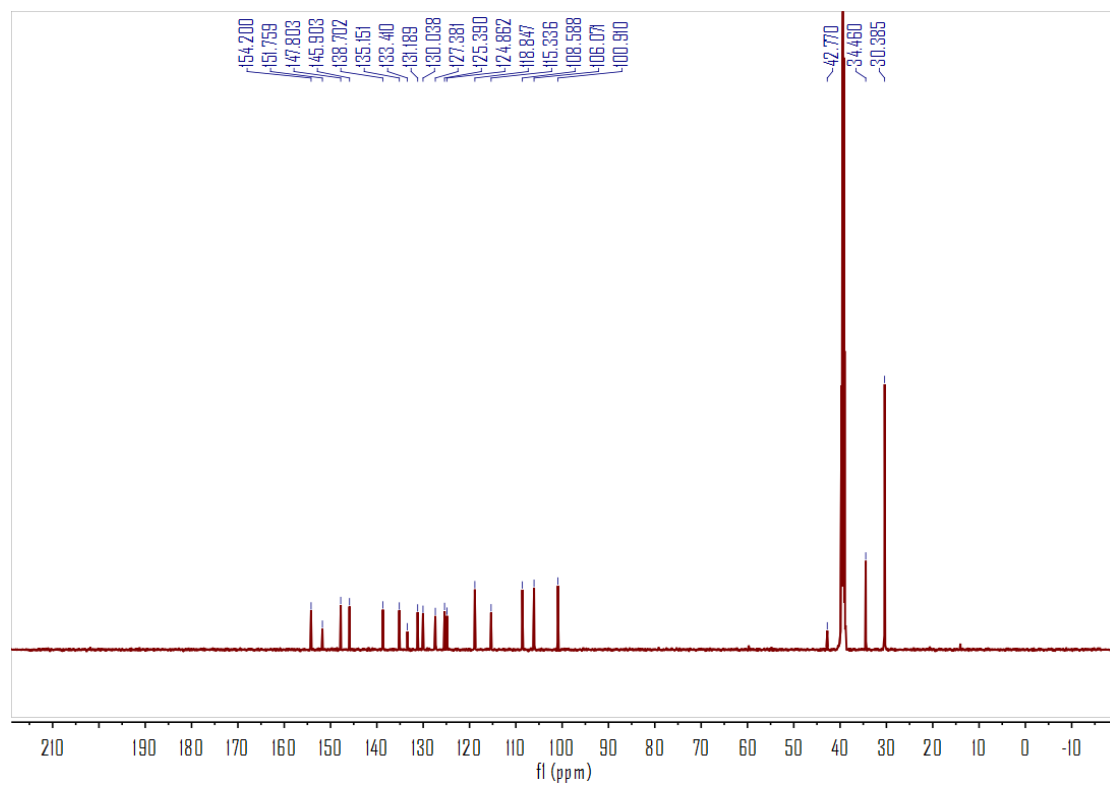

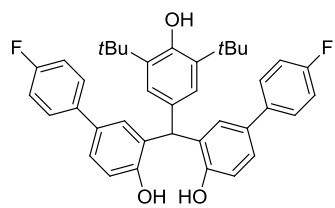

3p

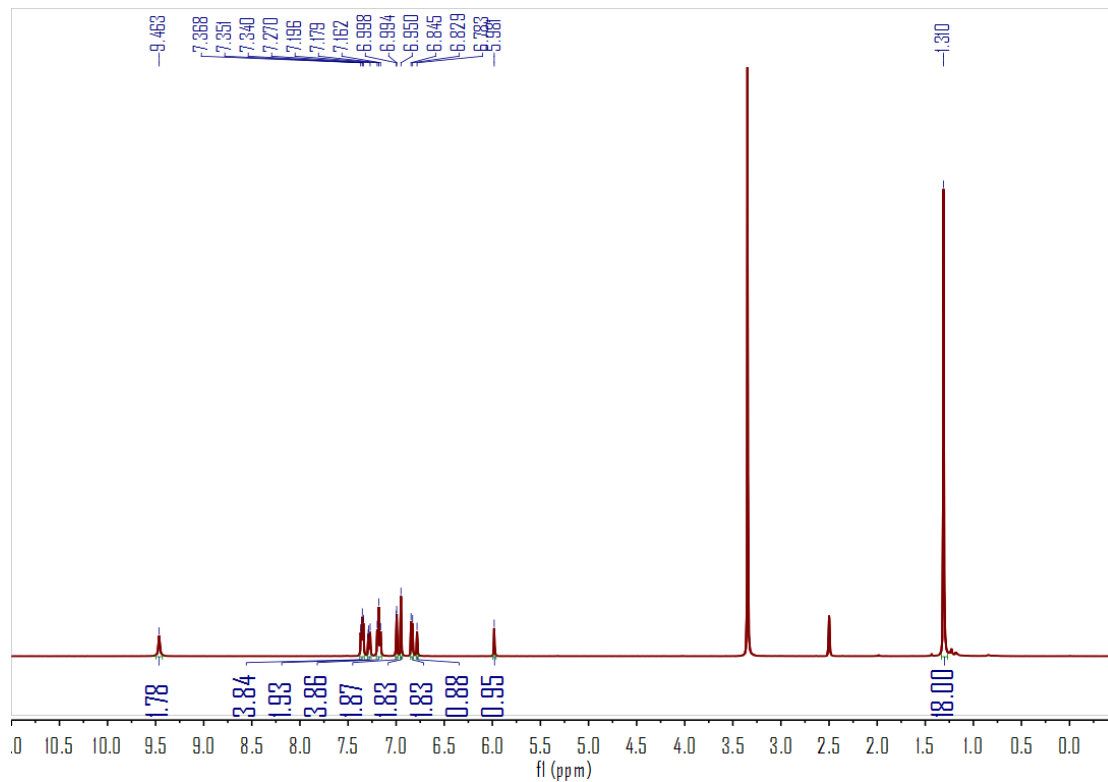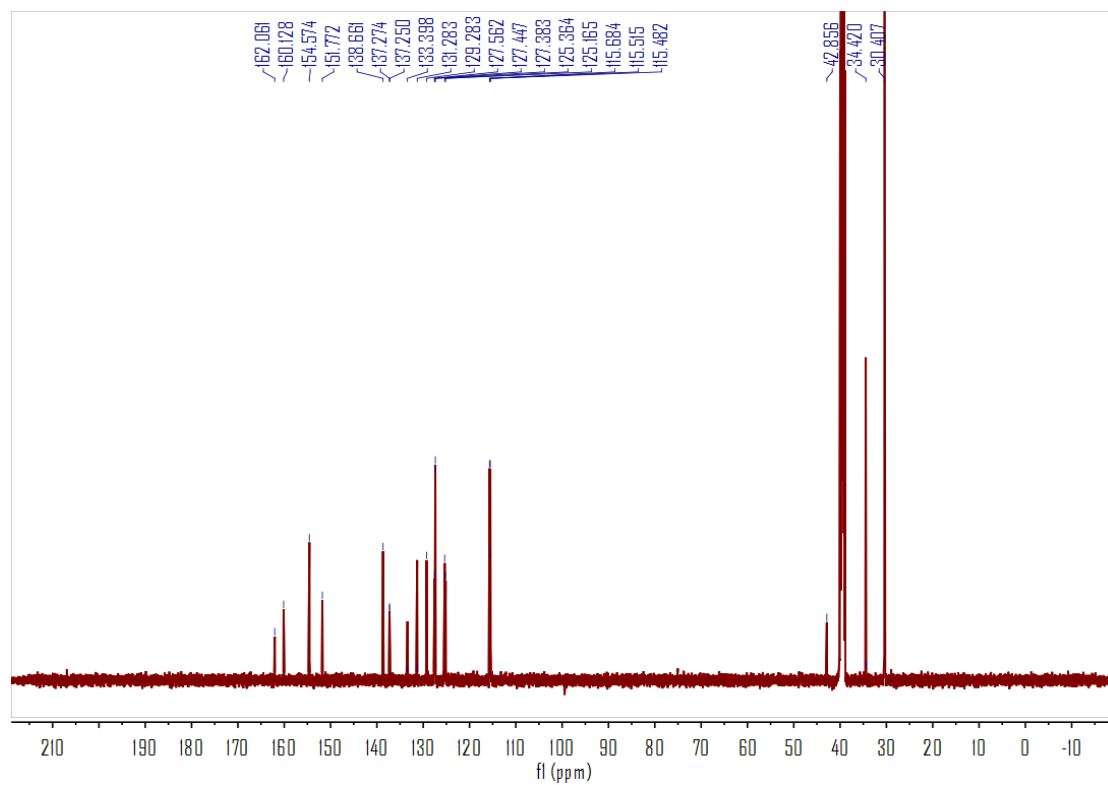

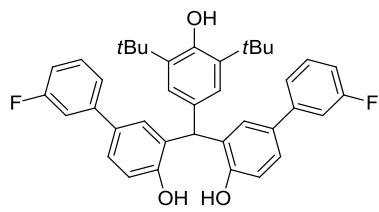

3q

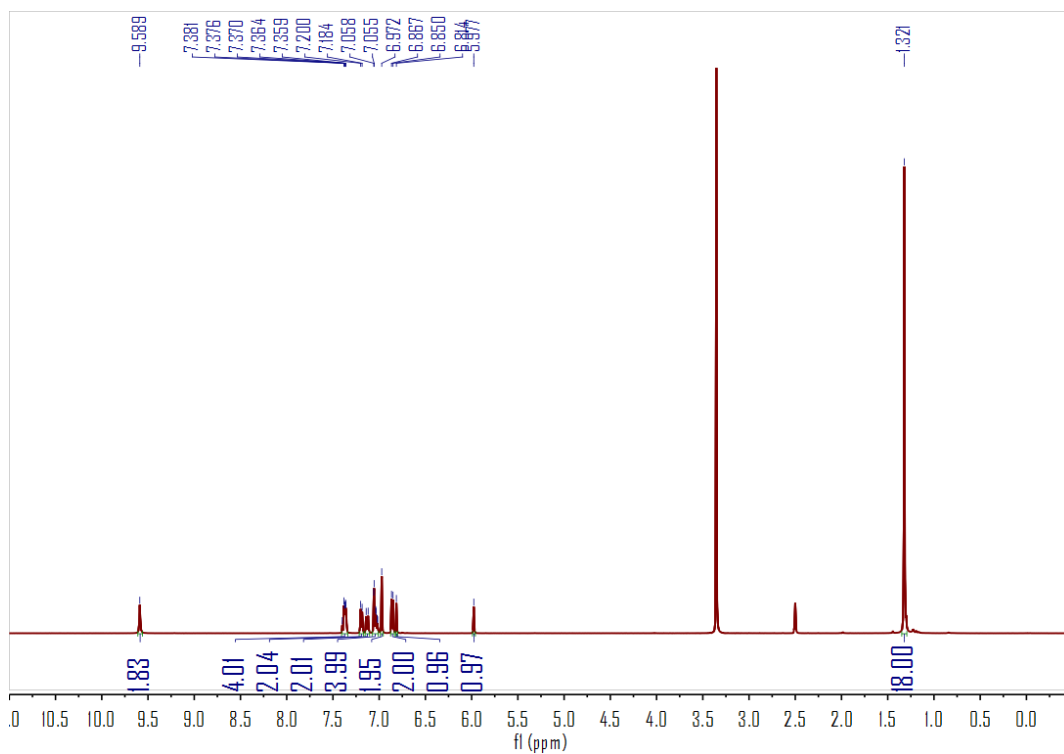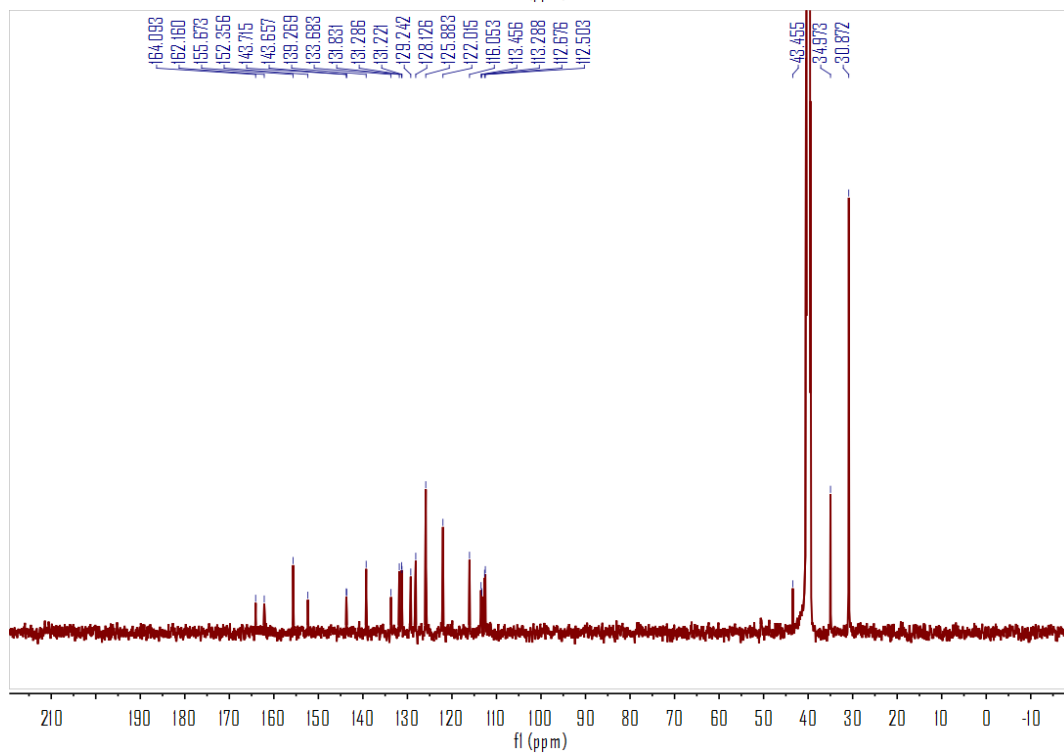

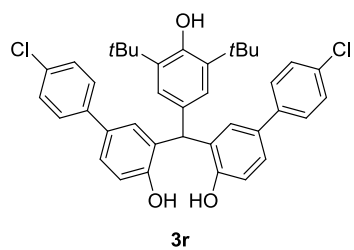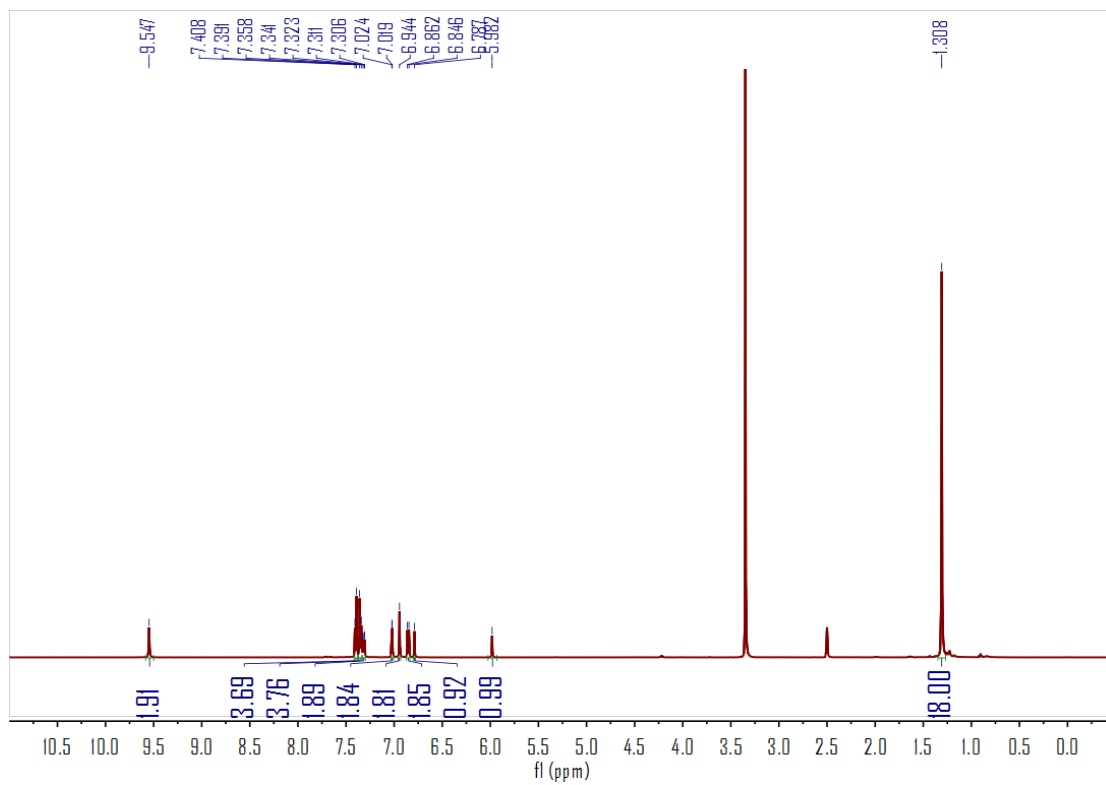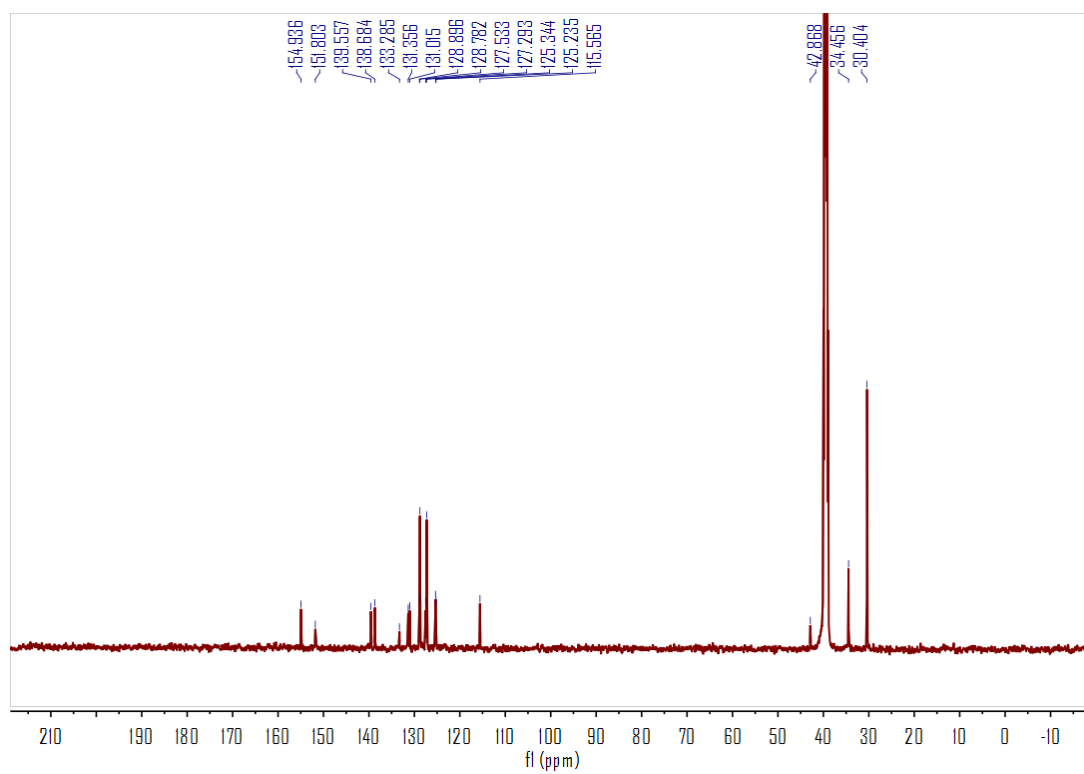

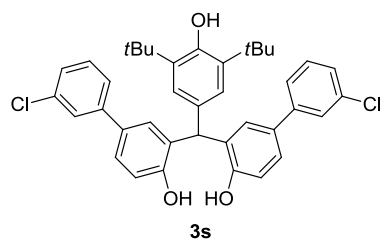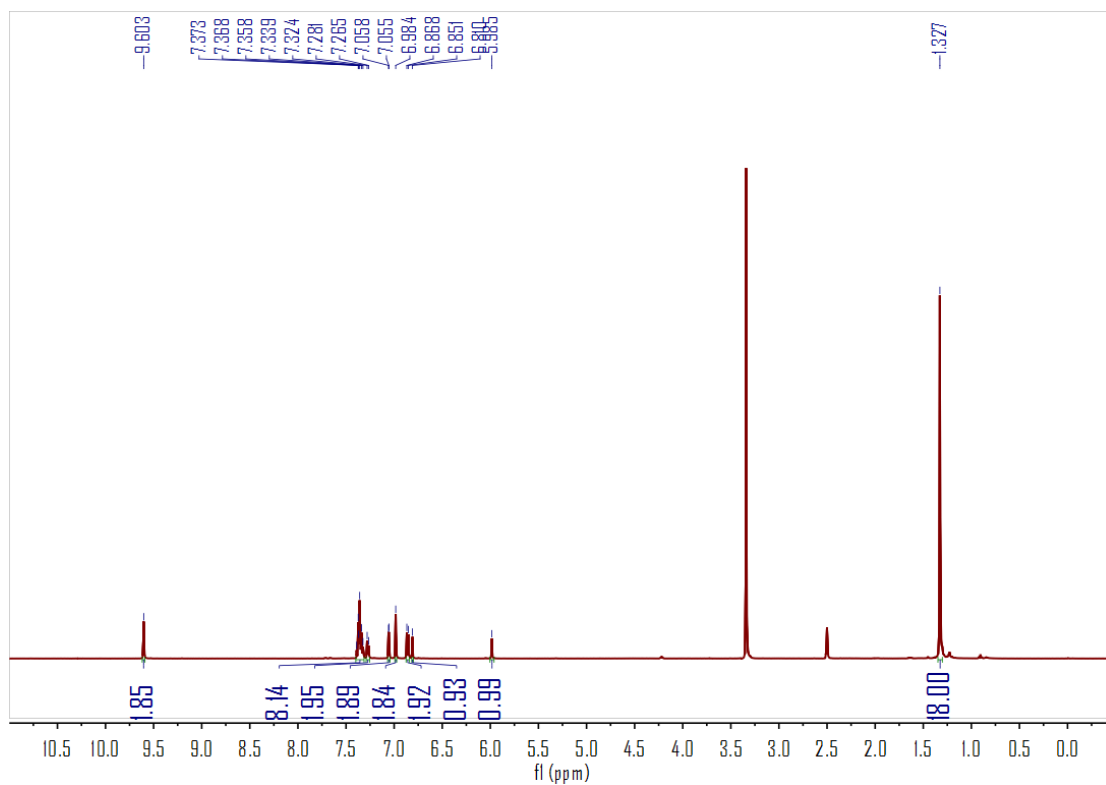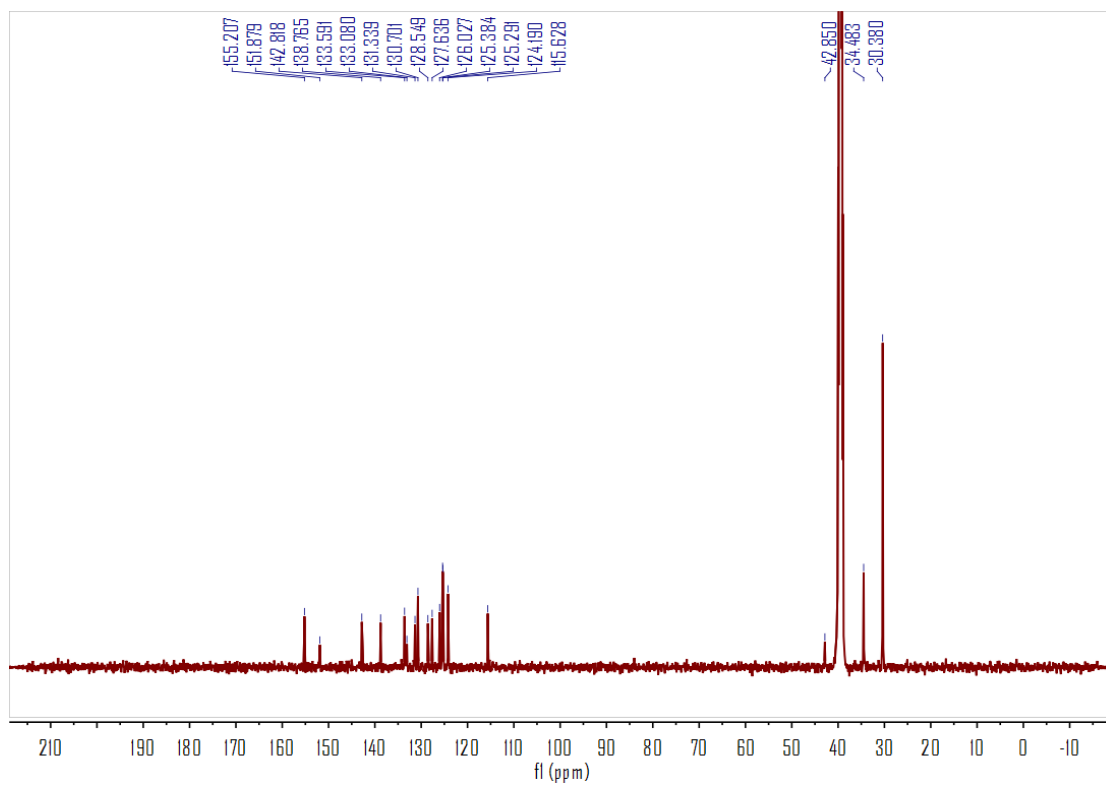

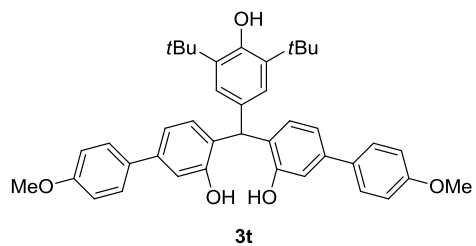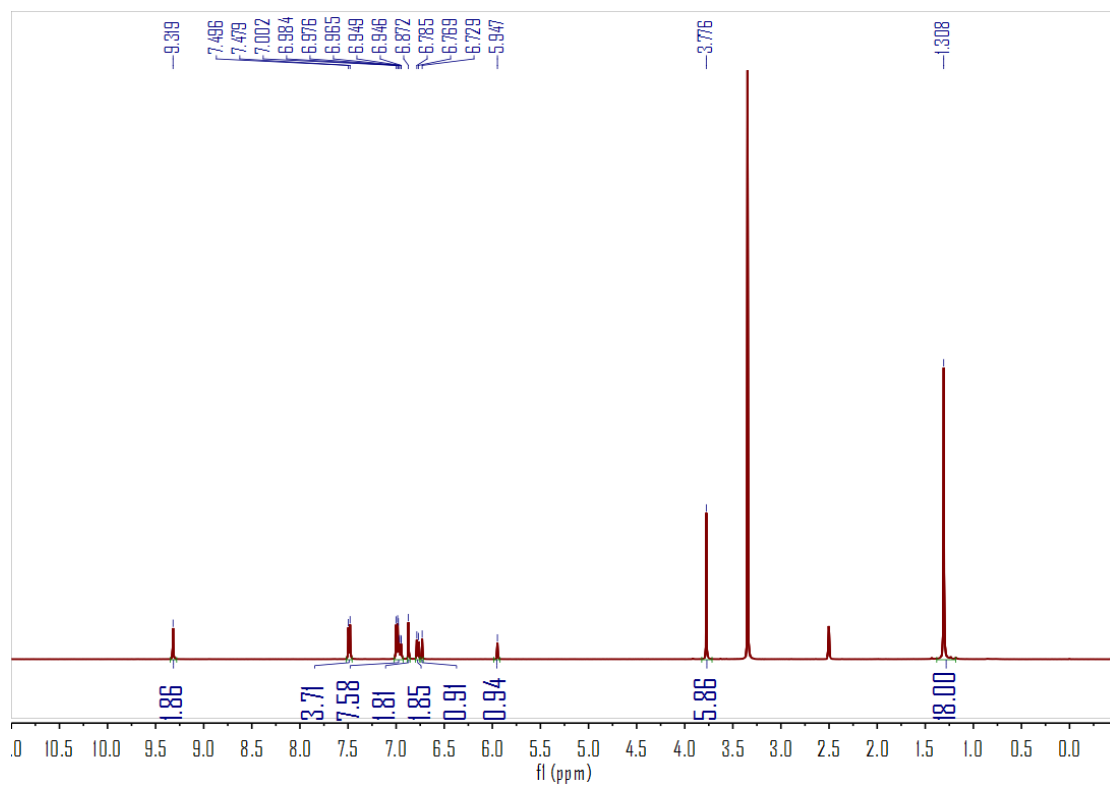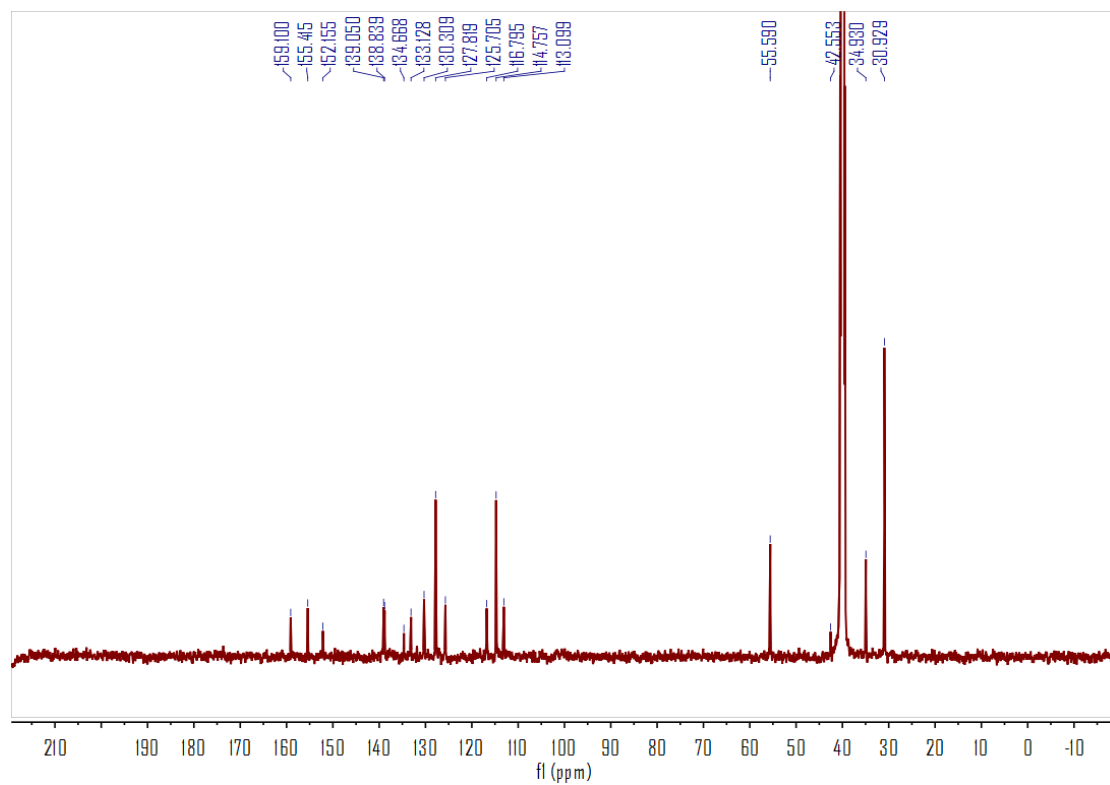

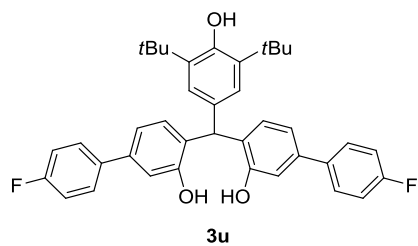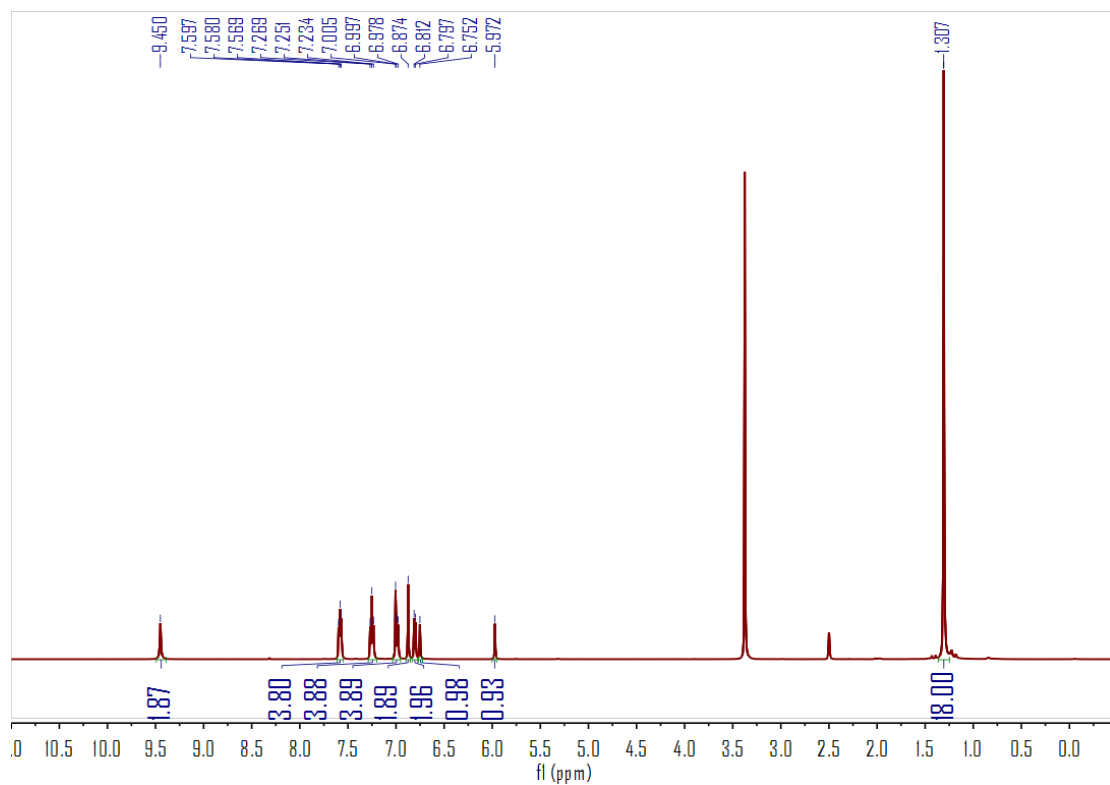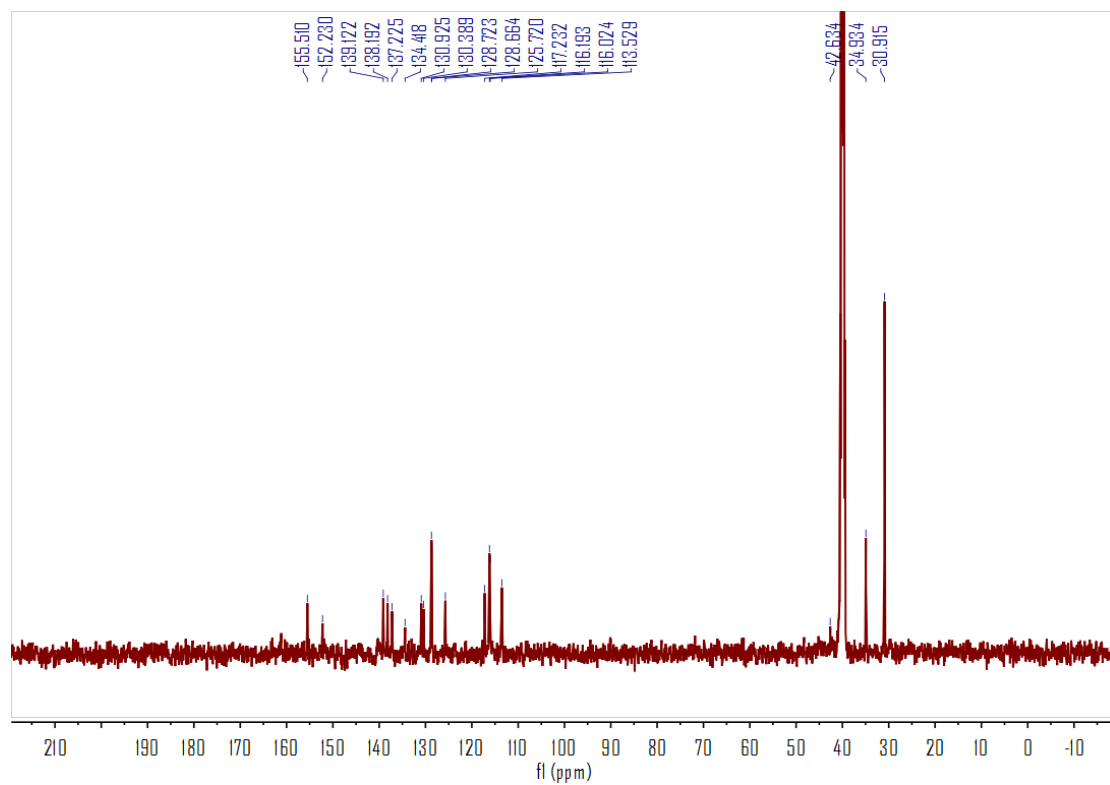

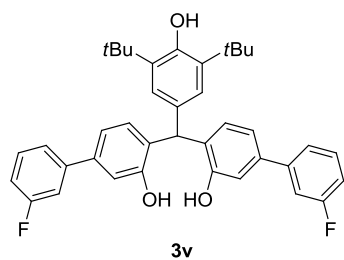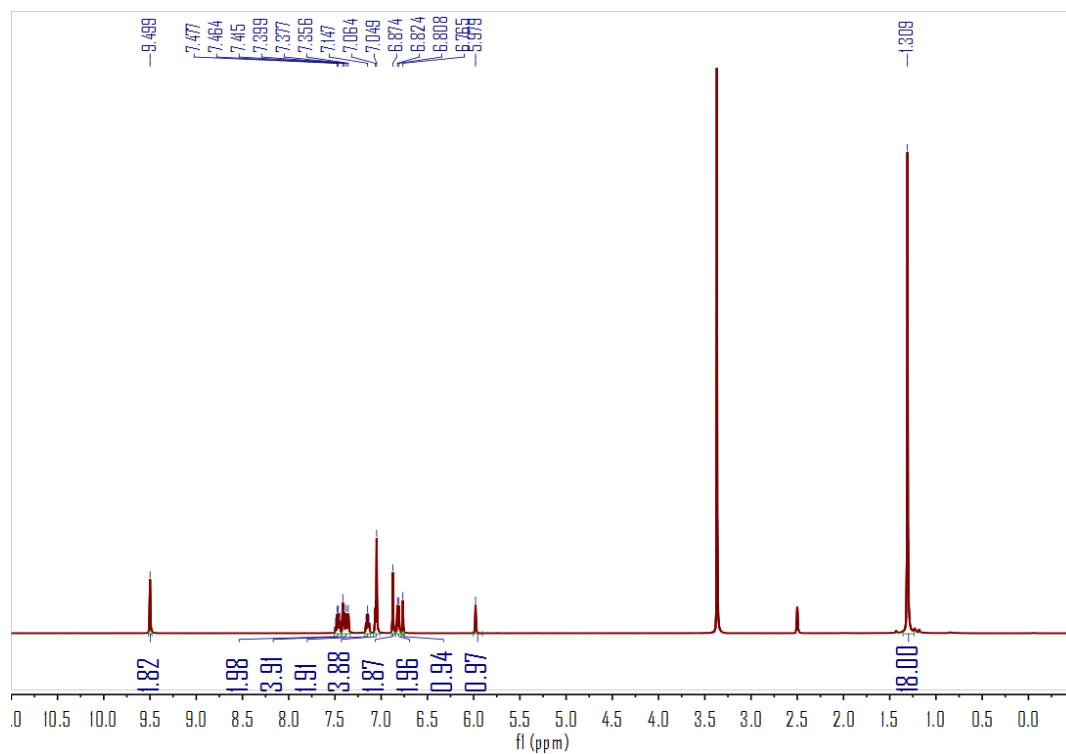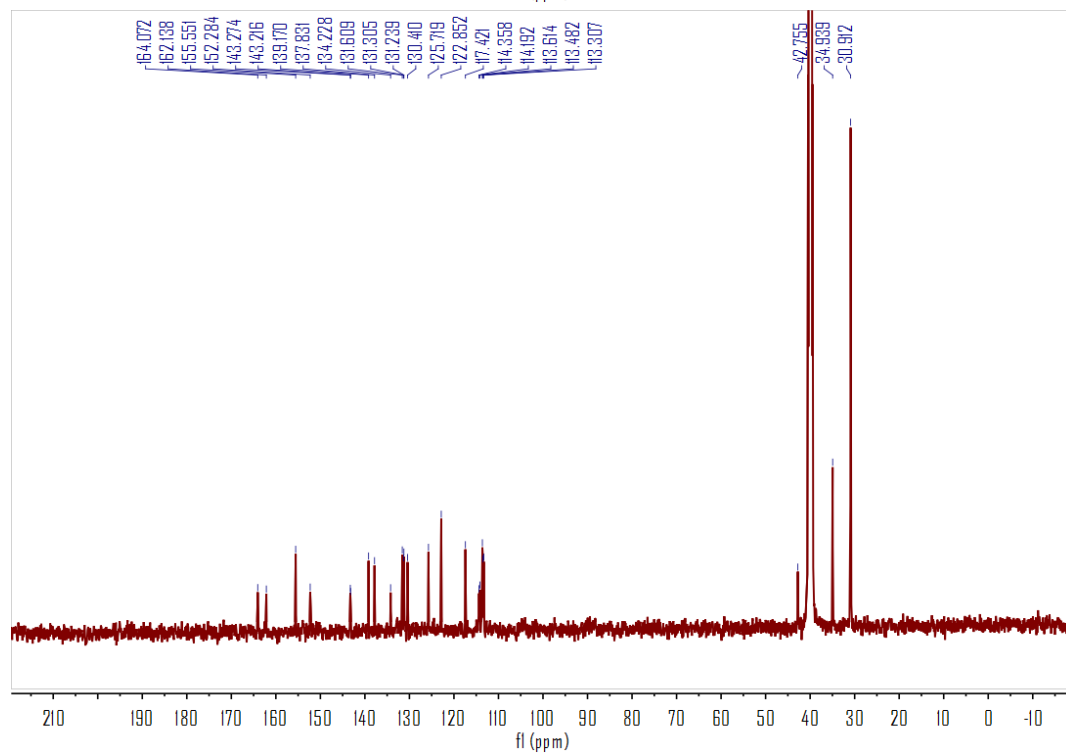



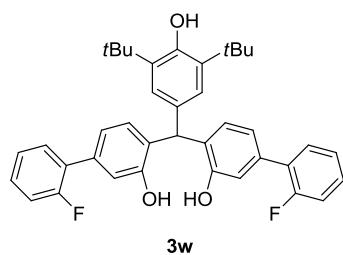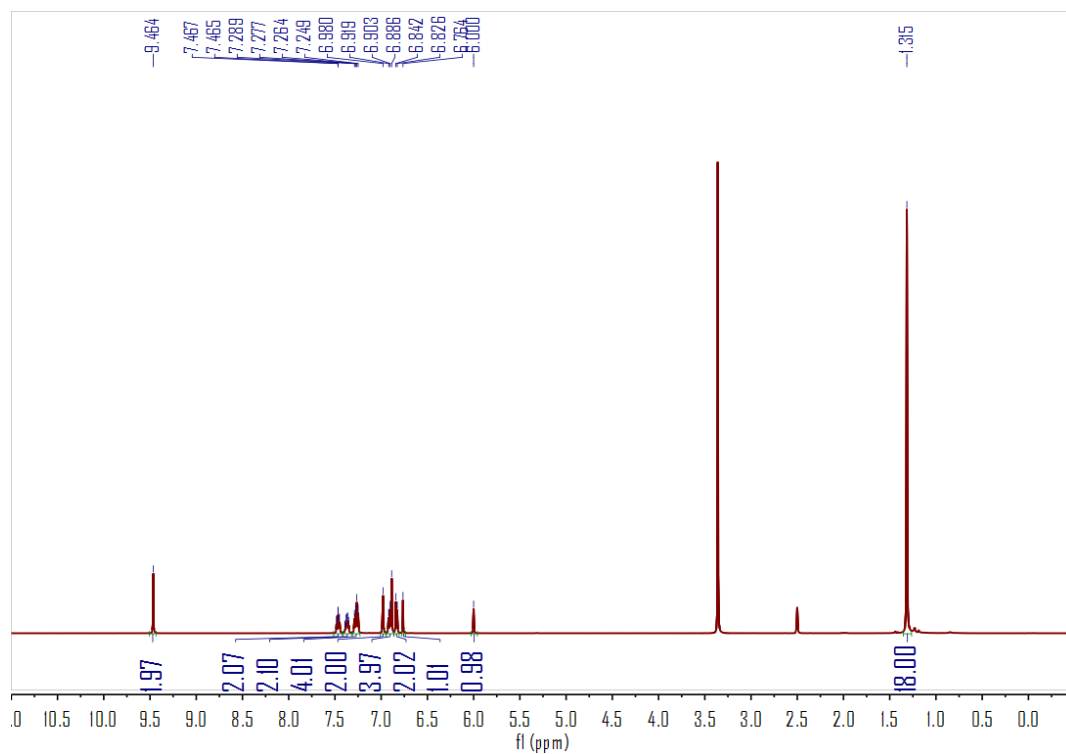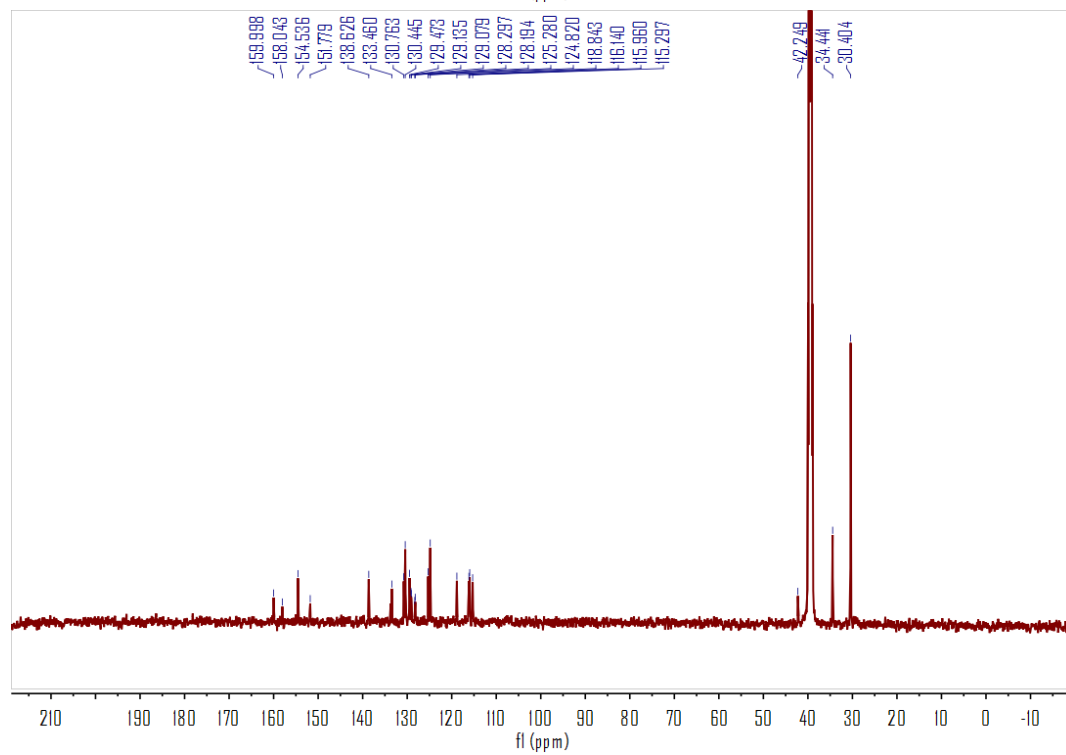

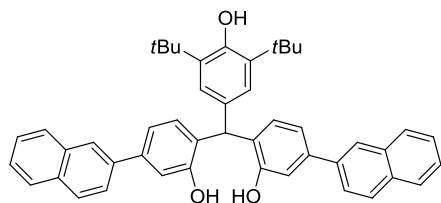

3x

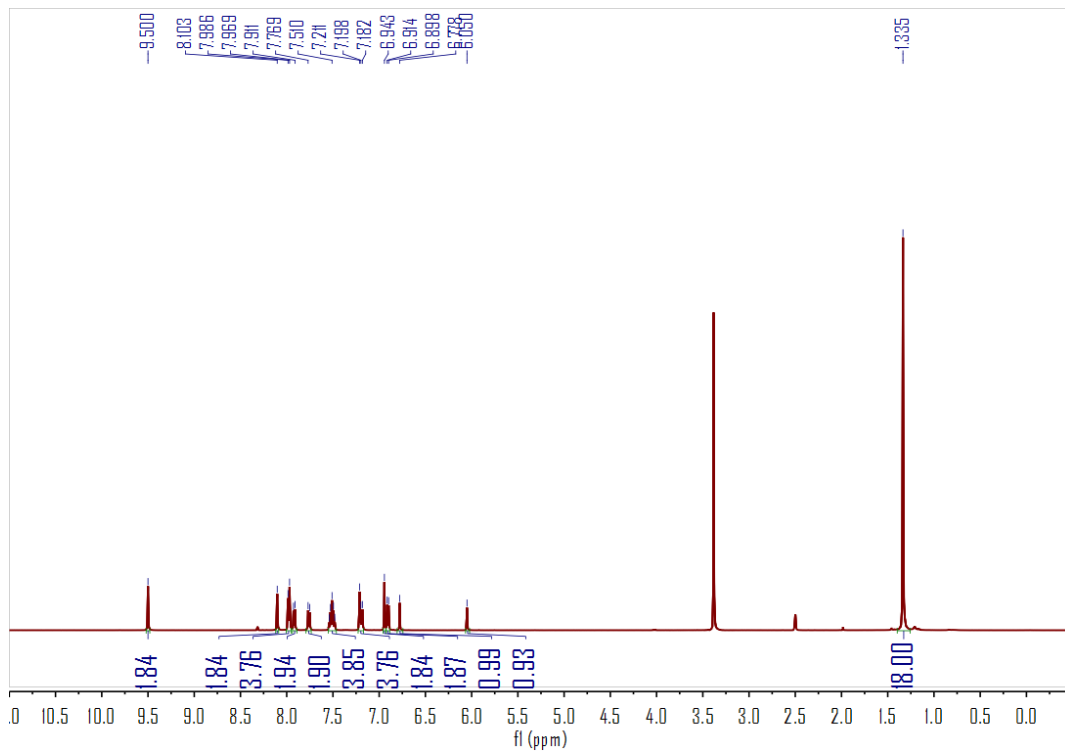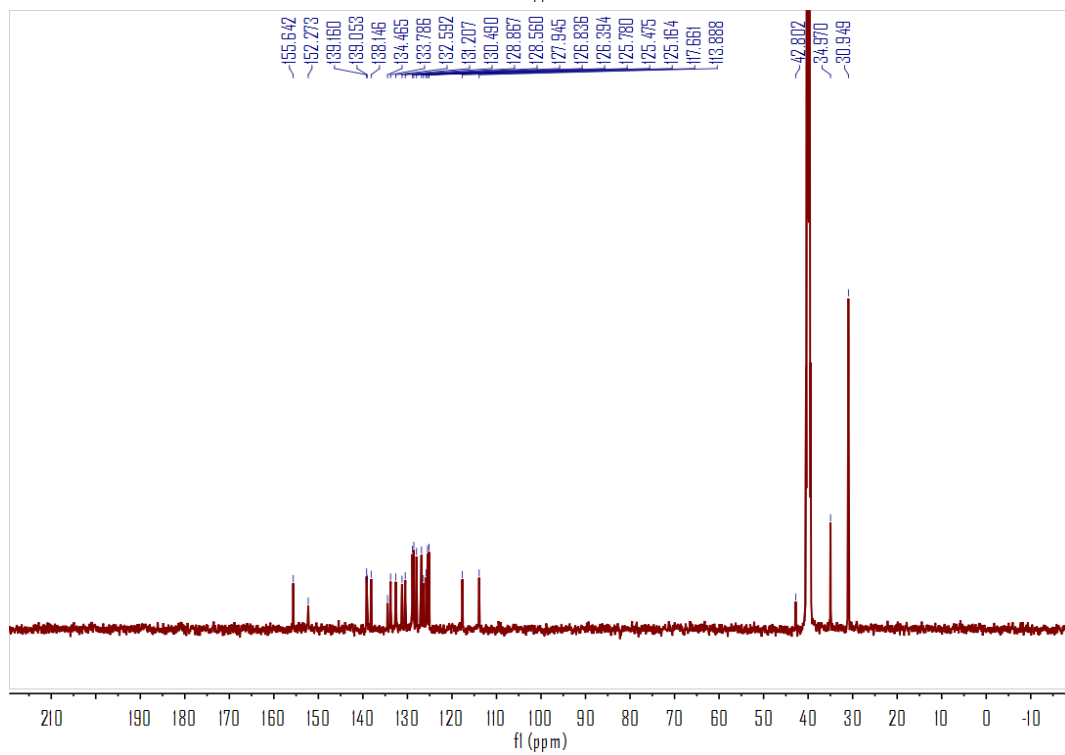

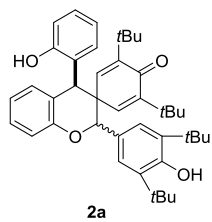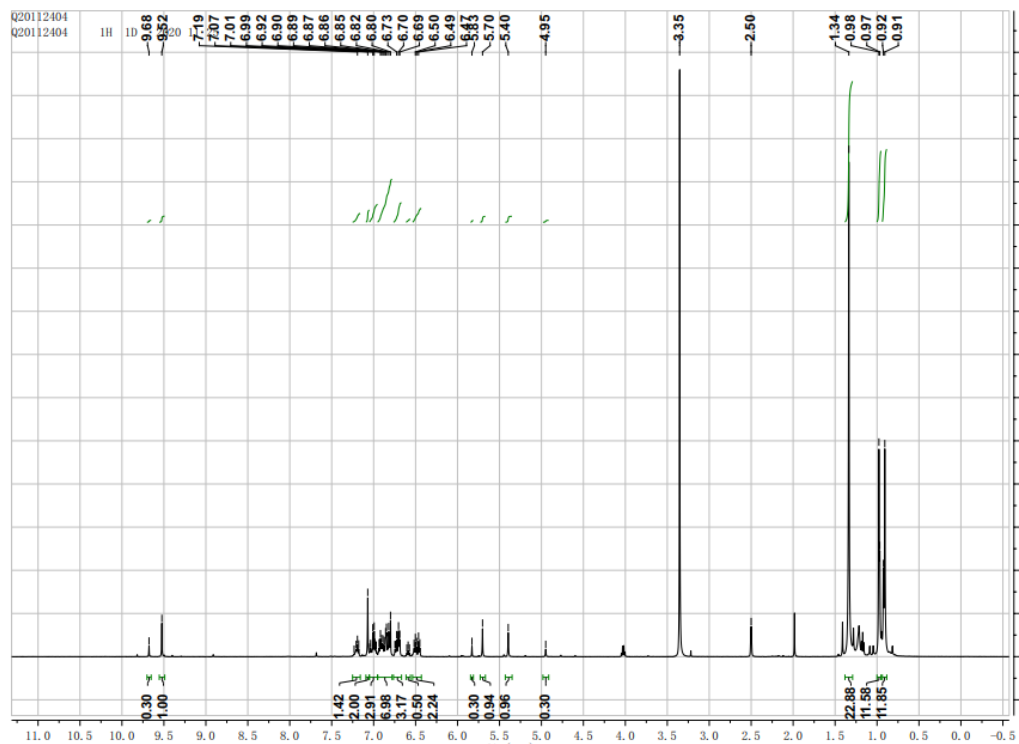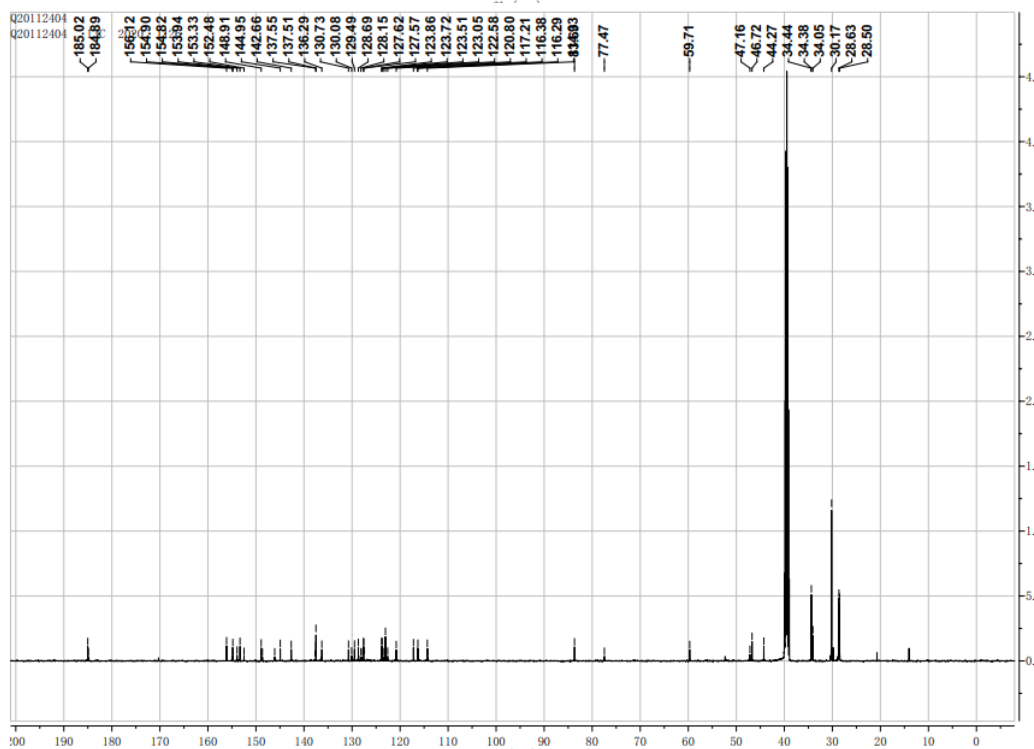

## 6. References

1. (a) Zhao, K.; Zhi, Y.; Shu, T.; Valkonen, A.; Rissanen, K.; Enders, D. *Angew. Chem. Int. Ed.* **2016**, *55*, 12104-12108. (b) Liu, S.; Lan, X.-C.; Chen, K.; Hao, W.-J.; Li, G.; Tu, S.-J.; Jiang, B. *Org. Lett.* **2017**, *19*, 3831-3834.
2. Sun, P.; Gao, S.; Yang, C.; Guo, S.; Lin, A.; Yao, H.; *Org. Lett.* **2016**, *18*, 6464-6467.
